# Supplementary material
Source: publisher figshare collection journal article supplement (https://acs.figshare.com/ndownloader/files/4071229)

# Supporting Information

## Regioselective and Stereospecific Copper-Catalyzed Aminoboration of Styrenes with Bis(pinacolato)diboron and *O*-Benzoyl-*N,N*-dialkylhydroxylamines

Naoki Matsuda, Koji Hirano,\* Tetsuya Satoh, and Masahiro Miura\*

*Department of Applied Chemistry, Faculty of Engineering, Osaka University, Suita, Osaka 565-0871, Japan*

### Contents

|                                                  |         |
|--------------------------------------------------|---------|
| <b>Instrumentation and Chemicals</b>             | S1–2    |
| <b>Experimental Procedures</b>                   | S3–S9   |
| <b>Stereochemical Assignment</b>                 | S10–S11 |
| <b>Detailed Optimization Studies</b>             | S12–S14 |
| <b>Complete Citations in References 2 and 10</b> | S15     |
| <b>Characterization Data for Products</b>        | S16–S61 |

### Instrumentation and Chemicals

<sup>1</sup>H, <sup>13</sup>C, and <sup>19</sup>F NMR spectra were recorded at 400 MHz, 100 MHz, and 373 MHz respectively, for CDCl<sub>3</sub> solutions. MS data were obtained by EI, CI, or FAB. GC analysis was carried out using a silicon OV-17 column (i. d. 2.6 mm x 1.5 m) or a CBP-1 capillary column (i. d. 0.5 mm x 25 m). TLC analyses were performed on commercial glass plates bearing 0.25-mm layer of Merck Silica gel 60F<sub>254</sub>. Silica gel (60 N, spherical neutral, Kanto Chemical) was used for column chromatography. Gel permeation chromatography (GPC) was performed by LC-6AD (SHIMADZU, two in-line Shodex, CHCl<sub>3</sub>, 3.5 mL/min, UV detector).

Unless otherwise noted, materials obtained from commercial suppliers were used without further purification. CuCl available from Wako Pure Chemical Co. was washed sequentially with 1M aq. HCl, EtOH, and Et<sub>2</sub>O three times at each steps and dried under high vacuum for 6 h before use. Dppbz was also obtained from Wako Pure Chemical Co. (*S,S*)-Me-Duphos and LiO-*t*-Bu were purchased from Aldrich. *O*-Benzoyl-*N,N*-diethylhydroxylamine (**2a**) was obtained by the reaction of *N,N*-diethylhydroxylamine with benzoyl chloride, while other *O*-benzoyl-*N,N*-dialkylhydroxylamines **2b–i** were synthesized through the nucleophilic substitution of the corresponding amines with benzoyl

peroxide.<sup>1</sup> Styrenes **1c** and **1k** were prepared according to the literature.<sup>2</sup> All reactions were carried out under nitrogen atmosphere.

---

<sup>1</sup> (a) Berman, A. M.; Johnson, J. S. *J. Am. Chem. Soc.* **2004**, *126*, 5680. (b) Berman, A. M.; Johnson, J. *Org. Chem.* **2006**, *71*, 219.

<sup>2</sup> Kabalka, G. W.; Tejedor, D.; Li, N.-S.; Malladi, R. R.; Trotman, S. *Tetrahedron* **1998**, *54*, 15525.

## Experimental Procedures

### 1. General procedure

A typical experiment procedure for copper-catalyzed aminoboration of *trans*- $\beta$ -methylstyrene ((*E*)-**1a**) with bis(pinacolato)diboron and *O*-benzoyl-*N,N*-diethylhydroxylamine (**2a**) (Table 1, entry 1): CuCl (2.5 mg, 0.025 mmol), 1,2-bis(diphenylphosphino)benzene (dppbz, 11 mg, 0.025 mmol), and LiO-*t*-Bu (60 mg, 0.75 mmol) were placed in a 20 mL two-necked reaction flask, which was filled with nitrogen by using the standard Schlenk technique. THF (0.50 mL) was then added to the flask, and the suspension was stirred for 15 min at ambient temperature. Finally, a solution of *trans*- $\beta$ -methylstyrene ((*E*)-**1a**, 30 mg, 0.25 mmol), bis(pinacolato)diboron (95 mg, 0.375 mmol), and *O*-benzoyl-*N,N*-diethylhydroxylamine (**2a**, 73 mg, 0.375 mmol) in THF (1.0 mL) was added dropwise. The solution was stirred at ambient temperature for additional 4 h. The resulting mixture was quenched with water. The mixture was extracted with ethyl acetate, and the combined organic layer was dried over sodium sulfate. Concentration under reduced pressure afforded the crude product. 1-Methylnaphthalene (ca. 25 mg) was then added as an internal standard, and the resulting mixture was analyzed by  $^1\text{H}$  NMR in  $\text{CDCl}_3$  solution. The yield of (1*S*\*,2*R*\*)-*N,N*-diethyl-1-phenyl-2-(4,4,5,5-tetramethyl-1,3,2-dioxaborolan-2-yl)propan-1-amine (**3aa**) was estimated to be 81% by comparison with integrated intensity of 1-methylnaphthalene. After the above  $^1\text{H}$  NMR analysis, the volatiles were evaporated, and the residue was purified by gel permeation chromatography (GPC) to give (1*S*\*,2*R*\*)-*N,N*-diethyl-1-phenyl-2-(4,4,5,5-tetramethyl-1,3,2-dioxaborolan-2-yl)propan-1-amine (**3aa**, 52 mg, 0.17 mmol) in 66% yield.

### 2. Sequential aminoboration/conversion into borate salt (Scheme 3)

Synthesis of **3aa-BF<sub>3</sub>**: CuCl (2.5 mg, 0.025 mmol), 1,2-bis(diphenylphosphino)benzene (dppbz, 11 mg, 0.025 mmol), and LiO-*t*-Bu (60 mg, 0.75 mmol) were placed in a 20 mL two-necked reaction flask, which was filled with nitrogen by using the standard Schlenk technique. THF (0.50 mL) was then added to the flask, and the suspension was stirred for 15 min at ambient temperature. Finally, a solution of *trans*- $\beta$ -methylstyrene ((*E*)-**1a**, 30 mg, 0.25 mmol), bis(pinacolato)diboron (95 mg, 0.375 mmol), and *O*-benzoyl-*N,N*-diethylhydroxylamine (**2a**, 73 mg, 0.375 mmol) in THF (1.0 mL) was added dropwise. The solution was stirred at ambient temperature for additional 4 h. The resulting mixture was quenched with water. The mixture was extracted with ethyl acetate, and the combined organic layer was dried over sodium sulfate and concentrated in vacuo to give the crude

aminoborated product. The crude aminoborated product was dissolved in THF/H<sub>2</sub>O (1.0/0.2 mL) and KHF<sub>2</sub> (156 mg, 2.0 mmol) was added. After the resulting mixture was stirred at ambient temperature for 2 h, the mixture was concentrated in vacuo. The dried solids were triturated with acetone and filtered to remove inorganic salts. The resulting filtrate was concentrated, and the residual solids was collected and rinsed with Et<sub>2</sub>O to give (1*S*\*,2*R*\*)-1-*N,N*-diethylammonio-1-phenyl-2-(trifluoroboryl)propane (**3aa-BF<sub>3</sub>**, 54 mg, 0.21 mmol) in 83% yield.

### 3. Sequential aminoboration/oxidation to 1,2-aminoalcohol (Scheme 4)

Synthesis of **4aa**: CuCl (2.5 mg, 0.025 mmol), 1,2-bis(diphenylphosphino)benzene (dppbz, 11 mg, 0.025 mmol), and LiO-*t*-Bu (60 mg, 0.75 mmol) were placed in a 20 mL two-necked reaction flask, which was filled with nitrogen by using the standard Schlenk technique. THF (0.50 mL) was then added to the flask, and the suspension was stirred for 15 min at ambient temperature. Finally, a solution of *trans*- $\beta$ -methylstyrene ((*E*)-**1a**, 30 mg, 0.25 mmol), bis(pinacolato)diboron (95 mg, 0.375 mmol), and *O*-benzoyl-*N,N*-diethylhydroxylamine (**2a**, 73 mg, 0.375 mmol) in THF (1.0 mL) was added dropwise. The solution was stirred at ambient temperature for additional 4 h. The resulting mixture was quenched with water. The mixture was extracted with ethyl acetate, and the combined organic layer was dried over sodium sulfate and concentrated in vacuo to give the crude aminoborated product. To the crude aminoborated product in THF (1.5 mL) and H<sub>2</sub>O (1.5 mL) was added NaBO<sub>3</sub>·OH<sub>2</sub> (349 mg, 3.5 mmol). The resulting mixture was stirred at ambient temperature for 5 h. The resulting mixture was quenched with sat. Na<sub>2</sub>S<sub>2</sub>O<sub>3</sub> aq. The mixture was extracted with Et<sub>2</sub>O, and the combined organic layer was dried over sodium sulfate. An aqueous solution of 4 M HCl (60 mL) was added to the organic layer. The aqueous layer was washed four times with Et<sub>2</sub>O, neutralized with 6 M NaOH aq. (40 mL), and then extracted four times with Et<sub>2</sub>O. The combined organic layer was dried over sodium sulfate and concentrated in vacuo to give (1*R*\*,2*R*\*)-1-(*N,N*-diethylamino)-1-phenylpropan-2-ol (**4aa**, 28 mg, 0.13 mmol) in 54% yield.

### 4. Sequential aminoboration/amination to 1,2-diamine (Scheme 4)

Synthesis of **5aa**: CuCl (2.5 mg, 0.025 mmol), 1,2-bis(diphenylphosphino)benzene (dppbz, 11 mg, 0.025 mmol), and LiO-*t*-Bu (60 mg, 0.75 mmol) were placed in a 20 mL two-necked reaction flask, which was filled with nitrogen by using the standard Schlenk technique. THF (0.50 mL) was then added to the flask, and the suspension was stirred for 15 min at ambient temperature. Finally, a

solution of *trans*- $\beta$ -methylstyrene ((*E*)-**1a**, 30 mg, 0.25 mmol), bis(pinacolato)diboron (95 mg, 0.375 mmol), and *O*-benzoyl-*N,N*-diethylhydroxylamine (**2a**, 73 mg, 0.375 mmol) in THF (1.0 mL) was added dropwise. The solution was stirred at ambient temperature for additional 4 h. The resulting mixture was quenched with water. The mixture was extracted with ethyl acetate, the combined organic layer was dried over sodium sulfate, and concentrated in vacuo to give the crude aminoborated product. *O*-Methylhydroxylamine (2.70 M THF solution, 0.56 mL, 1.50 mmol) in THF (2.0 mL) were placed in an another 20 mL two-necked reaction flask, which was filled with nitrogen by using the standard Schlenk technique. *n*-BuLi (1.6 M hexane solution, 0.91 mL, 1.50 mmol) was added to the flask at -78 °C, and the suspension was stirred for 30 min at -78 °C. A THF (1.0 mL) solution of the crude aminoborated product prepared in advance was then added dropwise to the solution, and the solution was stirred at 60 °C for additional 24 h. The resulting mixture was allowed to cool to room temperature, and Boc<sub>2</sub>O (0.34 mL, 1.50 mmol) was then added via a syringe. After being stirred at room temperature for 2 h, the resulting mixture was quenched with water. The mixture was extracted with ethyl acetate, and the combined organic layer was dried over sodium sulfate. Concentration in vacuo and purification by silica gel column chromatography with *n*-hexane/ethyl acetate (10:1, v/v) as an eluent gave *tert*-butyl [(1*R*\*,2*R*\*)-1-(*N,N*-diethylamino)-1-phenylpropan-2-yl]carbamate (**5aa**, 41 mg, 0.13 mmol) in 52% yield.

## 5. Enantioselective aminoboration (Scheme 5)

Synthesis of (1*S*,2*S*)-**4aa**: CuCl (2.5 mg, 0.025 mmol), (-)-1,2-bis[(2*S*,5*S*)-2,5-dimethylphospholano]benzene ((*S,S*)-Me-Duphos, 7.7 mg, 0.025 mmol), and LiO-*t*-Bu (60 mg, 0.75 mmol) were placed in a 20 mL two-necked reaction flask, which was filled with nitrogen by using the standard Schlenk technique. THF (0.50 mL) was then added to the flask, and the suspension was stirred for 15 min at ambient temperature. Finally, a solution of *trans*- $\beta$ -methylstyrene ((*E*)-**1a**, 30 mg, 0.25 mmol), bis(pinacolato)diboron (95 mg, 0.375 mmol), and *O*-benzoyl-*N,N*-diethylhydroxylamine (**2a**, 73 mg, 0.375 mmol) in THF (1.0 mL) was added dropwise. The solution was stirred at ambient temperature for additional 4 h. The resulting mixture was quenched with water. The mixture was extracted with ethyl acetate, and the combined organic layer was dried over sodium sulfate. Concentration under reduced pressure afforded the crude product. 1-Methylnaphthalene (ca. 25 mg) was then added as an internal standard, and the resulting mixture was analyzed by <sup>1</sup>H NMR in CDCl<sub>3</sub> solution. The yield of (1*S*,2*R*)-*N,N*-diethyl-1-phenyl-2-(4,4,5,5-tetramethyl-1,3,2-dioxaborolan-2-yl)propan-1-amine (1*S*,

*2R*)-**3aa**) was estimated to be 83% by comparison with integrated intensity of 1-methylnaphthalene. After the above  $^1\text{H}$  NMR analysis, the volatiles were evaporated. The enantiomer ratio was determined after the conversion of the residue into the corresponding aminoalcohol under identical conditions in page S4.

**4aa** (74% two-step yield): The enantiomeric ratio was determined by HPLC analysis in comparison with authentic racemic material (CHIRALCEL OD-3 column, 99.8/0.2 *n*-hexane/2-propanol, 1.0 mL/min, major isomer:  $t_R = 9.0$  min, minor isomer:  $t_R = 8.3$  min, UV detection at 231.9 nm, 30 °C.)

***rac*-4aa**

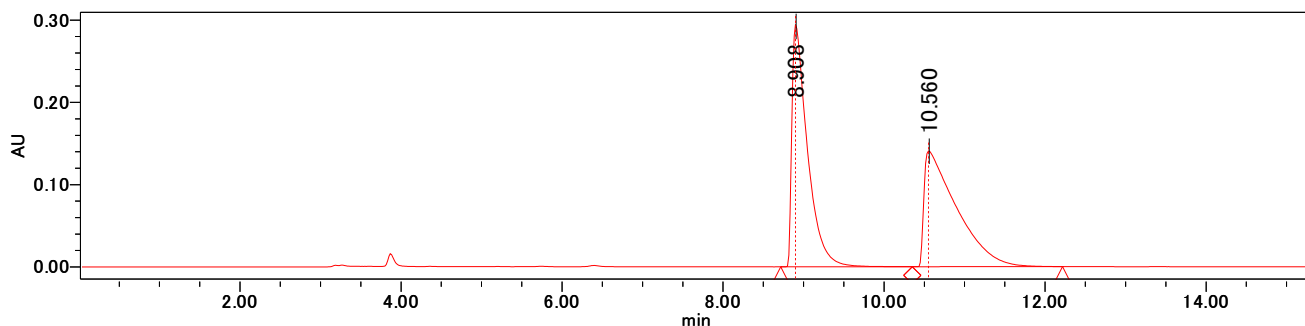

| Peak # | Ret. Time | Area    | Area % |
|--------|-----------|---------|--------|
| 1      | 8.908     | 3947945 | 49.98  |
| 2      | 10.56     | 3951598 | 50.02  |

**(1*S*,2*S*)-4aa**

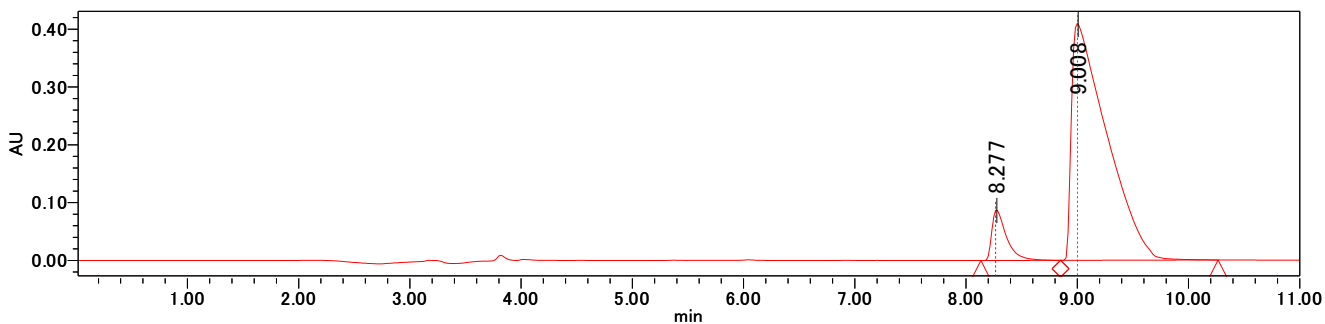

| Peak # | Ret. Time | Area    | Area % |
|--------|-----------|---------|--------|
| 1      | 8.277     | 795692  | 8.14   |
| 2      | 9.008     | 8976570 | 91.86  |

**4ab** (27% yield in the oxidation step, not optimized): The enantiomeric ratio was determined by HPLC analysis in comparison with authentic racemic material (CHIRALCEL OJ column, 99.9/0.1 *n*-hexane/2-propanol, 1.0 mL/min, major isomer:  $t_R$  = 21.7 min, minor isomer:  $t_R$  = 15.5 min, UV detection at 214.6 nm, 30 °C.)

***rac*-4ab**

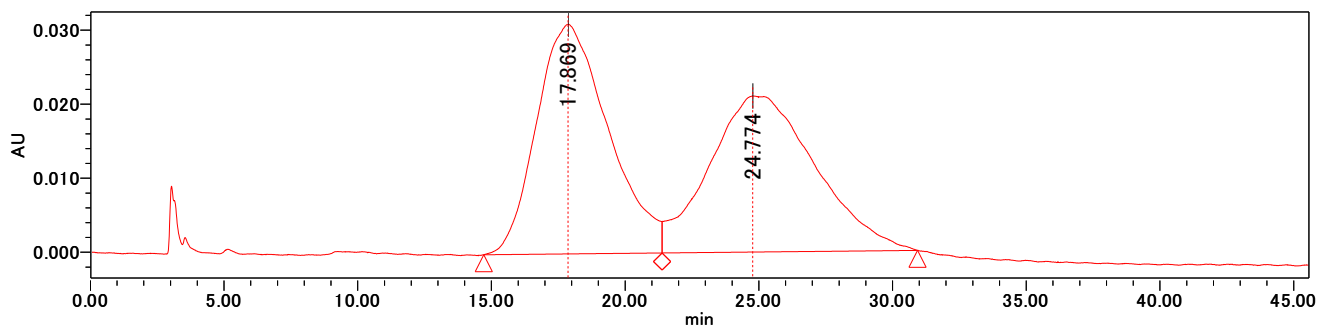

| Peak # | Ret. Time | Area    | Area % |
|--------|-----------|---------|--------|
| 1      | 17.869    | 5803167 | 49.93  |
| 2      | 24.774    | 5818437 | 50.07  |

**(1*S*,2*S*)-4ab**

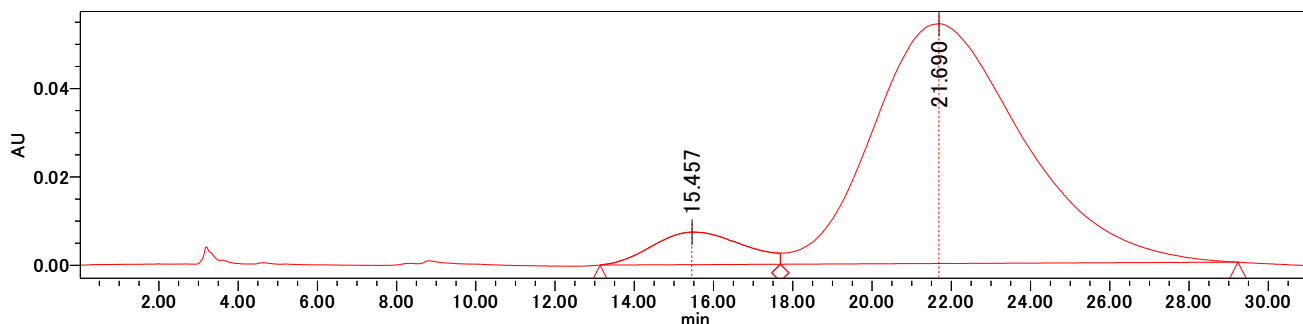

| Peak # | Ret. Time | Area     | Area % |
|--------|-----------|----------|--------|
| 1      | 15.457    | 1171454  | 7.61   |
| 2      | 21.69     | 14214121 | 92.39  |

**4bb** (29% yield in the oxidation step, not optimized): The enantiomeric ratio was determined by HPLC analysis in comparison with authentic racemic material (CHIRALCEL OD-3 column, 99.9/0.1 *n*-hexane/2-propanol, 1.0 mL/min, major isomer:  $t_R$  = 17.9 min, minor isomer:  $t_R$  = 20.4 min, UV detection at 220.0 nm, 30 °C.)

***rac*-4bb**

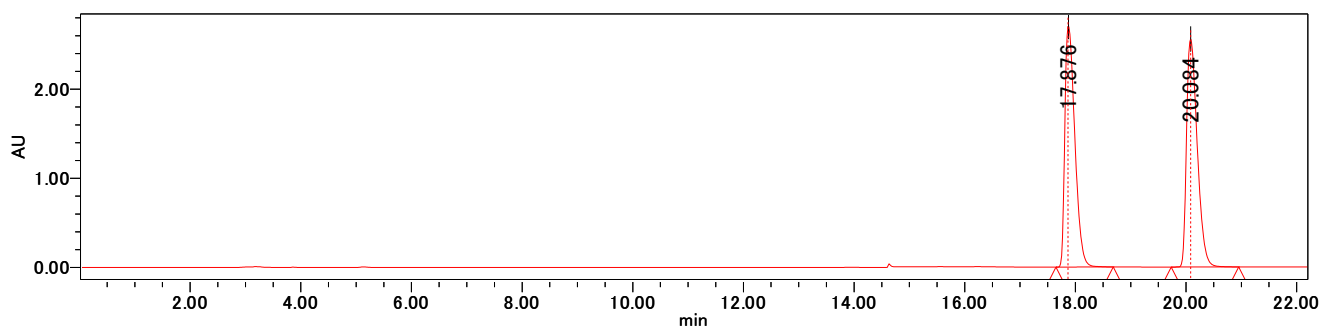

| Peak # | Ret. Time | Area     | Area % |
|--------|-----------|----------|--------|
| 1      | 17.876    | 33804181 | 49.69  |
| 2      | 20.084    | 34220689 | 50.31  |

**(1*S*,2*S*)-4bb**

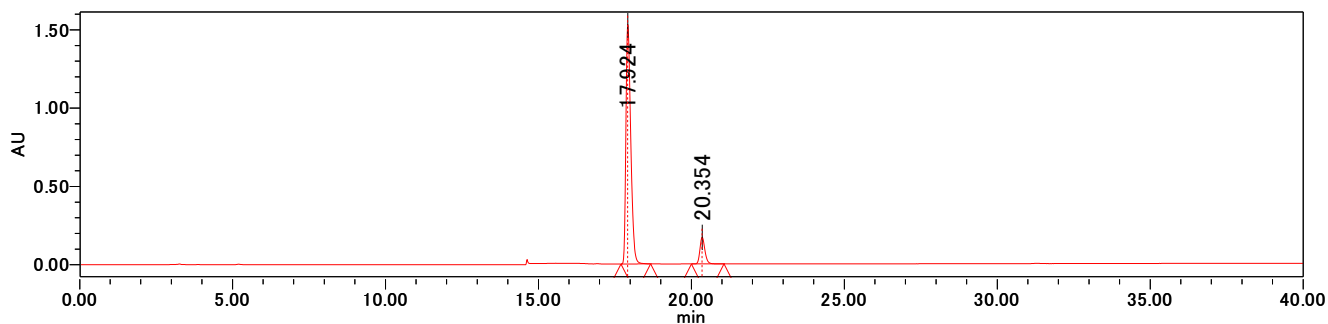

| Peak # | Ret. Time | Area     | Area % |
|--------|-----------|----------|--------|
| 1      | 17.924    | 16708513 | 89.76  |
| 2      | 20.354    | 1906053  | 10.24  |

## Stereochemical Assignment

### 1. Assignment of relative stereochemistry

Assignment of *syn*-**3aa** (Table 1, entry 1): The aminoboration of *trans*-*b*-methylstyrene ((*E*)-**1a**) with bis(pinacolato)diboron and *O*-benzoyl-*N,N*-diethylhydroxylamine (**2a**) was carried out according to the general procedure, and the crude material obtained was oxidized as follows. To the crude aminoborated product in THF (1.5 mL) and H<sub>2</sub>O (1.5 mL) was added NaBO<sub>3</sub>·OH<sub>2</sub> (349 mg, 3.5 mmol). The resulting mixture was stirred at ambient temperature for 5 h. The resulting mixture was quenched with sat. Na<sub>2</sub>S<sub>2</sub>O<sub>3</sub> aq. The mixture was extracted with Et<sub>2</sub>O, the combined organic layer was dried over sodium sulfate. An aqueous solution of 4 M HCl (60 mL) was added to the organic layer. The aqueous layer was washed four times with Et<sub>2</sub>O, neutralized with 6 M NaOH aq. (40 mL), and then extracted four times with Et<sub>2</sub>O. The combined organic layer was dried over sodium sulfate, and concentrated in vacuo to give (1*R*\*,2*R*\*)-1-(*N,N*-diethylamino)-1-phenylpropan-2-ol (**4aa**, 28 mg, 0.13 mmol, *syn/anti* = >99:1) in 54% yield as an analytically pure form. The relative stereochemistry of **4aa** was confirmed by the literature.<sup>3</sup>

The stereochemistry of other aminoborated products from *E*-alkenes is tentatively assigned by the result of **3aa**.

Assignment of *anti*-**3ab** (Scheme 2): The aminoboration of *cis*-*b*-methylstyrene ((*Z*)-**1a**) with bis(pinacolato)diboron and *O*-benzoyl-*N,N*-benzylhydroxylamine (**2b**) was carried out according to the general procedure to form *anti*-**3ab** in 52% yield. The isolated *anti*-**3ab** was oxidized under the same conditions as those for *syn*-**3aa**. The crude material was purified by silica gel column chromatography with *n*-hexane/ethyl acetate (3:1, v/v) as an eluent to give (1*R*\*,2*R*\*)-1-(*N,N*-dibenzylamino)-1-phenylpropan-2-ol (*anti*-**4ab**, 52 mg, 0.16 mmol, *syn/anti* = <1:99) in 63% yield. The relative stereochemistry of *anti*-**4ab** was confirmed by the literature.<sup>4</sup>

Assignment of *cis*-**3me** (Scheme 2): CuCl (2.5 mg, 0.025 mmol), 1,2-bis(diphenylphosphino)benzene (dppbz, 11 mg, 0.025 mmol), and NaO-*t*-Bu (48 mg, 0.50 mmol) were placed in a 20 mL two-necked reaction flask, which was filled with nitrogen by using the standard Schlenk technique. THF (0.50 mL) was then added to the flask, and the suspension was stirred for 15

<sup>3</sup> Xie, J.-H.; Liu, S.; Kong, W.-L.; Bai, W.-J.; Wang, X.-C.; Wang, L.-X.; Zhou, Q.-L. *J. Am. Chem. Soc.* **2009**, *131*, 4222.

<sup>4</sup> Schwerdtfeger, J.; Kolczewski, S.; Weber, B.; Fröhlich, R.; Hoppe, D. *Synthesis* **1999**, *9*, 1573.

min at ambient temperature. Finally, a solution of indene (**1m**, 29 mg, 0.25 mmol), bis(pinacolato)diboron (76 mg, 0.30 mmol), 1-piperidinyl benzoate (**2e**, 62 mg, 0.30 mmol), and 1-methylnaphthalene (ca. 25 mg, internal standard) in THF (1.0 mL) was added dropwise. The solution was stirred at ambient temperature for additional 4 h. The resulting mixture was quenched with water. The mixture was extracted with ethyl acetate, the combined organic layer was dried over sodium sulfate, and concentrated in vacuo to give the crude aminoborated product. The crude material was oxidized under the same conditions as those for *syn*-**3aa** to give (1*R*\*,2*S*\*)-1-(piperidin-1-yl)-2,3-dihydroinden-2-ol (**4me**, 24 mg, 0.11 mmol, *cis/trans* = >99:1) in 45% overall yield. The relative stereochemistry of **4me** was confirmed by the literature.<sup>5</sup>

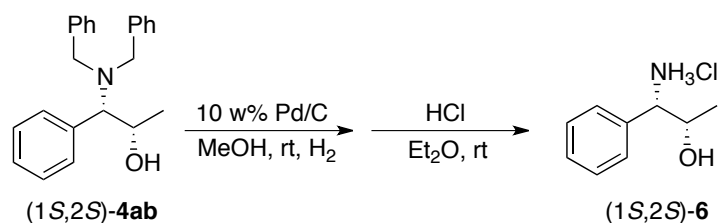

<sup>5</sup> Soh, J. Y.-T.; Tan, C.-H. *J. Am. Chem. Soc.* **2009**, *131*, 6904.

## Detailed Optimization Studies

**Table S1.** Optimization Studies for Copper-Catalyzed Aminoboration of *trans*- $\beta$ -Methylstyrene ((*E*)-**1a**) with Bis(pinacolato)diboron and *O*-Benzoyl-*N,N*-diethylhydroxylamine (**2a**).<sup>[a]</sup>

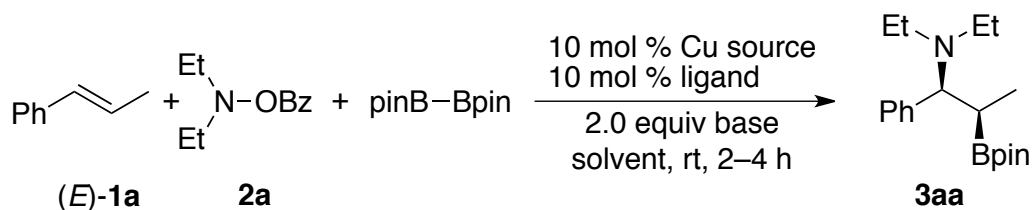

| entry | Cu source/ligand            | base                   | solvent     | yield [%] <sup>[b]</sup> |
|-------|-----------------------------|------------------------|-------------|--------------------------|
| 1     | CuCl/IMes•HCl               | LiO- <i>t</i> -Bu      | THF         | 27                       |
| 2     | CuCl/IPr•HCl                | LiO- <i>t</i> -Bu      | THF         | 0                        |
| 3     | CuCl/SIMes•HBF <sub>4</sub> | LiO- <i>t</i> -Bu      | THF         | 25                       |
| 4     | CuCl/SIPr•HCl               | LiO- <i>t</i> -Bu      | THF         | 0                        |
| 5     | CuCl/IMes                   | LiO- <i>t</i> -Bu      | THF         | 43                       |
| 6     | CuCl/ <i>It</i> -Bu         | LiO- <i>t</i> -Bu      | THF         | 0                        |
| 7     | <b>CuCl/dppbz</b>           | <b>LiO-<i>t</i>-Bu</b> | <b>THF</b>  | <b>78</b>                |
| 8     | CuCl/dppm                   | LiO- <i>t</i> -Bu      | THF         | 0                        |
| 9     | CuCl/dppe                   | LiO- <i>t</i> -Bu      | THF         | 44                       |
| 10    | CuCl/dppp                   | LiO- <i>t</i> -Bu      | THF         | 28                       |
| 11    | CuCl/dppb                   | LiO- <i>t</i> -Bu      | THF         | trace                    |
| 12    | CuCl/dpppen                 | LiO- <i>t</i> -Bu      | THF         | trace                    |
| 13    | CuCl/binap                  | LiO- <i>t</i> -Bu      | THF         | trace                    |
| 14    | CuCl/dppf                   | LiO- <i>t</i> -Bu      | THF         | 49                       |
| 15    | CuCl/xantphos               | LiO- <i>t</i> -Bu      | THF         | 19                       |
| 16    | CuCl/2PPh <sub>3</sub>      | LiO- <i>t</i> -Bu      | THF         | 0                        |
| 17    | CuCl/dppbz                  | LiO- <i>t</i> -Bu      | 1,4-dioxane | 0                        |
| 18    | CuCl/dppbz                  | LiO- <i>t</i> -Bu      | DME         | 53                       |

|                       |                              |                        |                   |                |
|-----------------------|------------------------------|------------------------|-------------------|----------------|
| 19                    | CuCl/dppbz                   | LiO- <i>t</i> -Bu      | CPME              | 35             |
| <b>20</b>             | <b><i>CuCl/dppbz</i></b>     | <b><i>NaO-t-Bu</i></b> | <b><i>THF</i></b> | <b>82</b>      |
| 21                    | CuCl/dppbz                   | NaO- <i>t</i> -Bu      | toluene           | 34             |
| 22                    | CuCl/dppbz                   | KO- <i>t</i> -Bu       | THF               | 36             |
| 23                    | CuCl/dppbz                   | NaOMe                  | THF               | 49             |
| 24                    | CuCl <sub>2</sub> /dppbz     | LiO- <i>t</i> -Bu      | THF               | 67             |
| 25                    | CuI/dppbz                    | LiO- <i>t</i> -Bu      | THF               | 33             |
| 26                    | CuBr•SMe <sub>2</sub> /dppbz | LiO- <i>t</i> -Bu      | THF               | 75             |
| 27                    | CuOAc/dppbz                  | LiO- <i>t</i> -Bu      | THF               | trace          |
| 28                    | Cu(OAc) <sub>2</sub> /dppbz  | LiO- <i>t</i> -Bu      | THF               | 61             |
| 29                    | Cu(OTf) <sub>2</sub> /dppbz  | LiO- <i>t</i> -Bu      | THF               | 41             |
| <b>30<sup>c</sup></b> | <b><i>CuCl/dppbz</i></b>     | <b><i>LiO-t-Bu</i></b> | <b><i>THF</i></b> | <b>81 (66)</b> |
| 31 <sup>c</sup>       | CuCl/dppbz                   | NaO- <i>t</i> -Bu      | THF               | 57             |
| 32 <sup>c</sup>       | none/dppbz                   | LiO- <i>t</i> -Bu      | THF               | 0              |
| 33 <sup>c</sup>       | CuCl/none                    | LiO- <i>t</i> -Bu      | THF               | 0              |
| 34 <sup>c</sup>       | none/none                    | LiO- <i>t</i> -Bu      | THF               | 0              |

[a] Reaction conditions: Cu source (0.025 mmol), ligand (0.025 mmol), (*E*)-**1a** (0.25 mmol), **2a** (0.30 mmol), bis(pinacolato)diboron (0.30 mmol), base (0.50 mmol), solvent (1.5 mL), N<sub>2</sub>, rt, 2–4 h. [b] Yield estimated by <sup>1</sup>H NMR. Yield of isolated product given in parenthesis. [c] With 0.375 mmol of **2a** and bis(pinacolato)diboron and 0.75 mmol of base.

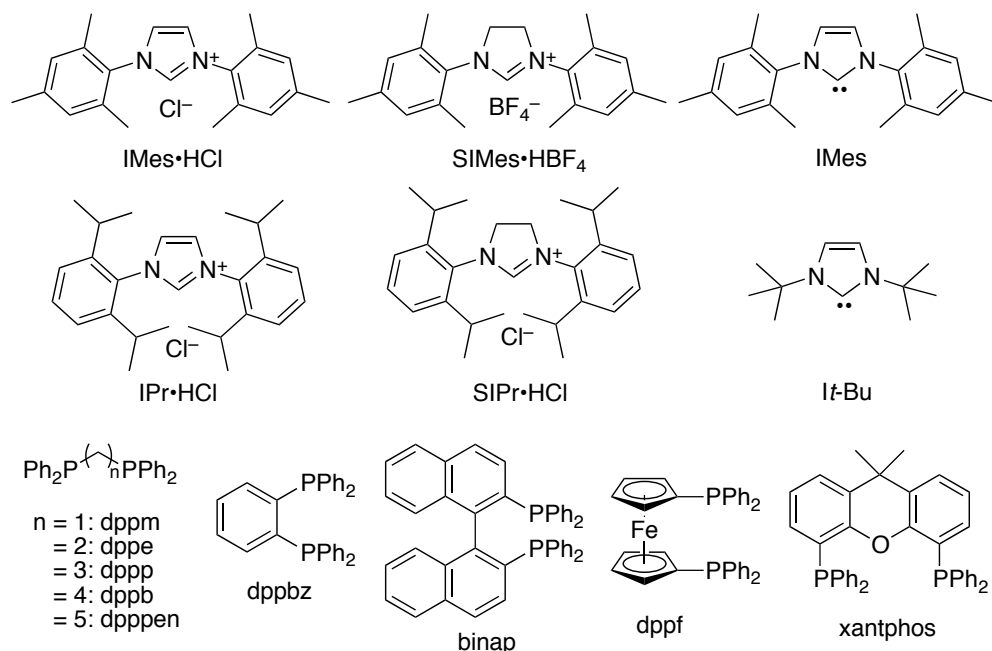

We chose *trans*- $\beta$ -methylstyrene ((*E*)-**1a**) and *O*-benzoyl-*N,N*-diethylhydroxylamine (**2a**) as model substrates and first investigated ligand effects in the presence of a CuCl salt and a LiO-*t*-Bu base in THF (Table S1, entries 1–16). Some mesityl-substituted NHCs formed a detectable amount of the desired aminoborated product **3aa** (entries 1, 3, and 5), while more bulky NHCs, IPr and *It*-Bu showed no activity (entries 2, 4, and 6). Subsequent survey of phosphorous ligands (entries 7–14) revealed that bidentate biphosphines bearing a relatively small bite angle were more effective. In particular, 1,2-bis(diphenylphosphino)benzene (dppbz) was promising (entry 7). On the other hand, a monodentate ligand, PPh<sub>3</sub>, resulted in no formation of **3aa** (entry 15). Solvent screening showed that other ethereal solvents were also tolerated, but THF was still superior (entries 17–19). As an alternative base, NaO-*t*-Bu gave a comparable result (entry 20), whereas other alkoxide bases were inferior (entries 22 and 23). Evaluation of copper salts identified CuCl to be the best catalyst precursor (entries 24–29). Finally, an increase in the amount of **2a**, bis(pinacolato)diboron, and LiO-*t*-Bu improved the yield to 86% (entry 30), while no positive effect was observed in the case of NaO-*t*-Bu (entry 31). On the basis of above studies, we determined conditions indicated of entries 20 and 30 to be optimal. Additionally notable is that in all cases *syn*-isomer was obtained exclusively. On the other hand, in the absence of CuCl, dppbz, or CuCl/dppbz, the aminoborated product was not detected at all (entries 32–34).

## Complete Citations in References 2 and 10

(2) Pd: (a) Pelz, N. F.; Woodward, A. R.; Burks, H. E.; Sieber, J. D.; Morken, J. P. *J. Am. Chem. Soc.* **2004**, *126*, 16328. (b) Burks, H. E.; Liu, S.; Morken, J. P. *J. Am. Chem. Soc.* **2007**, *129*, 8766. Pt: (c) Ishiyama, T.; Matsuda, N.; Miyaura, N.; Suzuki, A. *J. Am. Chem. Soc.* **1993**, *115*, 11018. (d) Iverson, C. N.; Smith, M. R., III *Organometallics* **1997**, *16*, 2757. (e) Marder, T. B.; Norman, N. C.; Rice, C. R. *Tetrahedron Lett.* **1998**, *39*, 155. (f) Burks, H. E.; Kliman, L. T.; Morken, J. P. *J. Am. Chem. Soc.* **2009**, *131*, 9134. (g) Kliman, L. T.; Mlynarski, S. N.; Morken, J. P. *J. Am. Chem. Soc.* **2009**, *131*, 13210. Rh: (h) Dai, C.; Robins, E. G.; Scott, A. J.; Clegg, W.; Yufit, D. S.; Howard, J. A. K.; Marder, T. B. *Chem. Commun.* **1998**, 1983. (i) Nguyen, P.; Coapes, R. B.; Woodward, A. D.; Taylor, N. J.; Burke, J. M.; Howard, J. A. K.; Marder, T. B. *J. Organomet. Chem.* **2002**, *652*, 77. (j) Morgan, J. B.; Miller, S. P.; Morken, J. P. *J. Am. Chem. Soc.* **2003**, *125*, 8702. Au: (k) Baker, R. T.; Nguyen, P.; Marder, T. B.; Westcott, S. A. *Angew. Chem., Int. Ed. Engl.* **1995**, *34*, 1336. Ag: (l) Ramírez, J.; Corberán, R.; Sanaú, M.; Peris, E.; Fernandez, E. *Chem. Commun.* **2005**, 3056. Cu: (m) Yoshida, H.; Kawashima, S.; Takemoto, Y.; Okada, K.; Ohshita, J.; Takaki, K. *Angew. Chem., Int., Ed.* **2012**, *51*, 235. Organocatalytic process: (n) Bonet, A.; Pubill-Ulldemolins, C.; Bo, C.; Gulyás, H.; Fernández, E. *Angew. Chem., Int. Ed.* **2011**, *50*, 7158.

(10) (a) Lee, Y.; Hoveyda, A. H. *J. Am. Chem. Soc.* **2009**, *131*, 3160. (b) Sasaki, Y.; Zhong, C.; Sawamura, M.; Ito, H. *J. Am. Chem. Soc.* **2010**, *132*, 1226. (c) Sasaki, Y.; Horita, Y.; Zhong, C.; Sawamura, M.; Ito, H. *Angew. Chem., Int. Ed.* **2011**, *50*, 2778. (d) Corberán, R.; Mszar, N. W.; Hoveyda, A. H. *Angew. Chem., Int. Ed.* **2011**, *50*, 7079. (e) Jang, H.; Zhugralin, A. R.; Lee, Y.; Hoveyda, A. H. *J. Am. Chem. Soc.* **2011**, *133*, 7859. (f) Jung, H.-Y.; Yun, J. *Org. Lett.* **2012**, *14*, 2606. (g) Park, J. K.; Ondrusek, B. A.; McQuade, D. T. *Org. Lett.* **2012**, *14*, 4790. (h) Semba, K.; Fujihara, T.; Terao, J.; Tsuji, Y. *Chem.–Eur. J.* **2012**, *18*, 4179. (i) Yuan, W.; Ma, S. *Org. Biomol. Chem.* **2012**, *10*, 7266. (j) Moure, A. L.; Arrayás, R. G.; Cárdenas, D. J.; Alonso, I.; Carretero, J. C. *J. Am. Chem. Soc.* **2012**, *134*, 7219. (k) Yuan, W.; Ma, S. *Adv. Synth. Catal.* **2012**, *354*, 1867.

## Characterization Data for Products

$^1\text{H}$  and  $^{13}\text{C}$  NMR spectra for all compounds are attached in the last part.

**(1*S*\*,2*R*\*)-*N,N*-Diethyl-1-phenyl-2-(4,4,5,5-tetramethyl-1,3,2-dioxaborolan-2-yl)propan-1-amine (3aa)** oil;  $^1\text{H}$  NMR (400 MHz,  $\text{CDCl}_3$ )  $\delta$  0.73 (d,  $J = 7.3$  Hz, 3H), 1.06 (t,  $J = 7.3$  Hz, 6H), 1.29 (s, 12H), 1.87-1.97 (m, 3H), 2.67 (qd,  $J = 12.8, 7.3$  Hz, 2H), 3.78 (d,  $J = 12.4$  Hz, 1H), 7.15 (d,  $J = 7.3$  Hz, 2H), 7.22 (t,  $J = 7.3$  Hz, 1H), 7.30 (t,  $J = 7.3$  Hz, 2H);  $^{13}\text{C}$  NMR (100 MHz,  $\text{CDCl}_3$ )  $\delta$  13.04, 13.85, 25.04, 25.25, 43.61, 66.66, 82.93, 126.86, 127.84, 129.42, 137.30; HRMS (CI)  $m/z$  ( $[\text{M}+\text{H}]^+$ ) calcd for  $\text{C}_{19}\text{H}_{33}\text{BNO}_2$ : 318.2604, found: 318.2600.

**(1*S*\*,2*R*\*)-*N,N*-Dibenzyl-1-phenyl-2-(4,4,5,5-tetramethyl-1,3,2-dioxaborolan-2-yl)propan-1-amine (*syn*-3ab)** m.p. 144.0-145.0  $^\circ\text{C}$ ;  $^1\text{H}$  NMR (400 MHz,  $\text{CDCl}_3$ )  $\delta$  0.66 (d,  $J = 7.3$  Hz, 3H), 1.36 (s, 6H), 1.37 (s, 6H), 2.10 (qd,  $J = 12.4, 7.3$  Hz, 1H), 2.94 (d,  $J = 13.7$  Hz, 2H), 3.85 (d,  $J = 12.4$  Hz, 1H), 3.95 (d,  $J = 13.7$  Hz, 2H), 7.14 (d,  $J = 7.3$  Hz, 2H), 7.18-7.23 (m, 2H), 7.25-7.31 (m, 5H), 7.38 (t,  $J = 7.3$  Hz, 2H), 7.42 (d,  $J = 7.3$  Hz, 4H);  $^{13}\text{C}$  NMR (100 MHz,  $\text{CDCl}_3$ )  $\delta$  14.09, 25.36, 25.51, 54.37, 65.80, 83.24, 126.79, 127.10, 127.96, 128.08, 129.38, 129.79, 136.46, 140.14; HRMS (CI)  $m/z$  ( $[\text{M}+\text{H}]^+$ ) calcd for  $\text{C}_{29}\text{H}_{37}\text{BNO}_2$ : 442.2917, found: 442.2913.

**(1*S*\*,2*S*\*)-*N,N*-Dibenzyl-1-phenyl-2-(4,4,5,5-tetramethyl-1,3,2-dioxaborolan-2-yl)propan-1-amine (*anti*-3ab)** m.p. 113.0-114.0  $^\circ\text{C}$ ;  $^1\text{H}$  NMR (400 MHz,  $\text{CDCl}_3$ )  $\delta$  0.77 (s, 6H), 0.86 (s, 6H), 1.28 (d,  $J = 7.3$  Hz, 3H), 2.03 (qd,  $J = 12.4, 7.3$  Hz, 1H), 2.97 (d,  $J = 13.7$  Hz, 2H), 3.66 (d,  $J = 12.4$  Hz, 1H), 3.92 (d,  $J = 13.7$  Hz, 2H), 7.13-7.35 (m, 11H), 7.42 (d,  $J = 7.3$  Hz, 4H);  $^{13}\text{C}$  NMR (100 MHz,  $\text{CDCl}_3$ )  $\delta$  13.62, 24.14, 24.39, 53.23, 64.56, 82.83, 126.81, 127.12, 127.77, 128.41, 129.03, 129.84, 138.15, 140.75; HRMS (CI)  $m/z$  ( $[\text{M}+\text{H}]^+$ ) calcd for  $\text{C}_{29}\text{H}_{37}\text{BNO}_2$ : 442.2917, found: 442.2919.

**(1*S*\*,2*R*\*)-*N*-Benzyl-*N*-methyl-1-phenyl-2-(4,4,5,5-tetramethyl-1,3,2-dioxaborolan-2-yl)propan-1-amine (3ac)** m.p. 65.0-66.5  $^\circ\text{C}$ ;  $^1\text{H}$  NMR (400 MHz,  $\text{CDCl}_3$ )  $\delta$  0.77 (d,  $J = 7.3$  Hz, 3H), 1.30 (s, 6H), 1.31 (s, 6H), 2.01 (qd,  $J = 12.4, 7.3$  Hz, 1H), 2.05 (s, 3H), 3.07 (d,  $J = 12.4$  Hz, 1H), 3.43 (d,  $J = 12.4$  Hz, 1H), 3.77 (d,  $J = 12.4$  Hz, 1H), 7.19-7.30 (m, 6H), 7.34-7.37 (m, 4H);  $^{13}\text{C}$  NMR (100 MHz,  $\text{CDCl}_3$ )  $\delta$  12.91, 24.99 (two signals are overlapped.), 37.83, 58.81, 71.76, 83.14, 126.81, 127.13, 127.94 (two signals are overlapped.), 129.54, 129.63, 136.54, 140.11; HRMS (CI)  $m/z$  ( $[\text{M}+\text{H}]^+$ ) calcd for  $\text{C}_{23}\text{H}_{33}\text{BNO}_2$ : 366.2604, found: 366.2596.

***N*-Butyl-*N*-[(1*S*\*,2*R*\*)-1-phenyl-2-(4,4,5,5-tetramethyl-1,3,2-dioxaborolan-2-yl)propyl]-4-penten-1-amine (3ad)** oil; <sup>1</sup>H NMR (400 MHz, CDCl<sub>3</sub>) δ 0.71 (d, *J* = 7.3 Hz, 3H), 0.90 (t, *J* = 7.3 Hz, 3H), 1.21-1.62 (m, 6H), 1.29 (s, 12H), 1.88-2.10 (m, 5H), 2.48-2.58 (m, 2H), 3.74 (d, *J* = 12.4 Hz, 1H), 4.93 (dd, *J* = 10.1, 1.8 Hz, 1H), 5.00 (dd, 16.9, 1.8 Hz, 1H), 5.83 (tdd, *J* = 16.9, 10.1, 6.4 Hz, 1H), 7.14 (d, *J* = 7.3 Hz, 2H), 7.21-7.33 (m, 3H); <sup>13</sup>C NMR (100 MHz, CDCl<sub>3</sub>) δ 13.28, 14.44, 21.07, 25.18, 25.20, 28.11, 31.13, 32.10, 50.28, 50.52, 67.48, 82.97, 114.33, 126.85, 127.83, 129.49, 137.40, 139.31; HRMS (EI) *m/z* (*M*<sup>+</sup>) calcd for C<sub>24</sub>H<sub>40</sub>BNO<sub>2</sub>: 385.3152, found: 385.3152.

**4-[(1*S*\*,2*R*\*)-1-Phenyl-2-(4,4,5,5-tetramethyl-1,3,2-dioxaborolan-2-yl)propyl]morpholine (3ag)** m.p. 59.0-60.0 °C; <sup>1</sup>H NMR (400 MHz, CDCl<sub>3</sub>) δ 0.75 (d, *J* = 7.3 Hz, 3H), 1.31 (s, 6H), 1.32 (s, 6H), 1.92 (qd, *J* = 11.9, 7.3 Hz, 1H), 2.27 (m, 2H), 2.51 (m, 2H), 3.55 (d, *J* = 11.9 Hz, 1H), 3.58-3.68 (m, 4H), 7.13 (d, *J* = 7.3 Hz, 2H), 7.25 (t, *J* = 7.3 Hz, 1H), 7.33 (t, *J* = 7.3 Hz, 2H); <sup>13</sup>C NMR (100 MHz, CDCl<sub>3</sub>) δ 12.56, 24.93, 25.36 (two signals are overlapped.), 67.37, 73.02, 83.07, 127.32, 127.98, 129.41, 135.95; HRMS (CI) *m/z* ([*M*+H]<sup>+</sup>) calcd for C<sub>19</sub>H<sub>31</sub>BNO<sub>3</sub>: 332.2397, found: 332.2398.

***tert*-Butyl 4-[(1*S*\*,2*R*\*)-1-phenyl-2-(4,4,5,5-tetramethyl-1,3,2-dioxaborolan-2-yl)propyl]piperazine-1-carboxylate (3ah)** m.p. 142.0-143.0 °C; <sup>1</sup>H NMR (400 MHz, CDCl<sub>3</sub>) δ 0.74 (d, *J* = 7.3 Hz, 3H), 1.30 (s, 6H), 1.31 (s, 6H), 1.38 (s, 9H), 1.92 (qd, *J* = 12.2, 7.3 Hz, 1H), 2.19 (m, 2H), 2.46 (m, 2H), 3.34 (m, 4H), 3.60 (d, *J* = 12.2 Hz, 1H), 7.11 (d, *J* = 7.3 Hz, 2H), 7.25 (t, *J* = 7.3 Hz, 1H), 7.32 (t, *J* = 7.3 Hz, 2H); <sup>13</sup>C NMR (100 MHz, CDCl<sub>3</sub>) δ 12.73, 24.92, 25.41, 28.56, 49.22, 73.00 (two signals are overlapped.), 79.54, 83.05, 127.33, 128.00, 129.33, 135.82, 154.82; HRMS (EI) *m/z* (*M*<sup>+</sup>) calcd for C<sub>24</sub>H<sub>39</sub>BN<sub>2</sub>O<sub>4</sub>: 430.3003, found: 430.3007.

**2-[(1*S*\*,2*R*\*)-1-Phenyl-2-(4,4,5,5-tetramethyl-1,3,2-dioxaborolan-2-yl)propyl]-1,2,3,4-tetrahydroisoquinoline (3ai)** m.p. 55.0-56.0 °C; <sup>1</sup>H NMR (400 MHz, CDCl<sub>3</sub>) δ 0.81 (d, *J* = 7.3 Hz, 3H), 1.13 (s, 12H), 2.06 (qd, *J* = 11.9, 7.3 Hz, 1H), 2.26-2.34 (m, 1H), 2.72-2.79 (m, 1H), 2.85-2.92 (m, 2H), 3.57 (d, *J* = 14.7 Hz, 1H), 3.68 (d, *J* = 14.7 Hz, 1H), 3.76 (d, *J* = 11.9 Hz, 1H), 6.95-7.04 (m, 4H), 7.23-7.26 (m, 3H), 7.33 (t, *J* = 7.3 Hz, 2H); <sup>13</sup>C NMR (100 MHz, CDCl<sub>3</sub>) δ 12.61, 24.62, 25.05, 29.77, 46.40, 52.70, 72.50, 82.98, 125.32, 125.68, 126.61, 127.27, 127.99, 128.51, 129.39, 134.82, 136.03, 136.18; HRMS (CI) *m/z* ([*M*+H]<sup>+</sup>) calcd for C<sub>24</sub>H<sub>33</sub>BNO<sub>2</sub>: 378.2604, found: 378.2603.

**(1*S*\*,2*R*\*)-*N,N*-Dibenzyl-1-(4-methoxyphenyl)-2-(4,4,5,5-tetramethyl-1,3,2-dioxaborolan-2-yl)propan-1-amine (3bb)** m.p. 159.5-161.0 °C; <sup>1</sup>H NMR (400 MHz, CDCl<sub>3</sub>) δ 0.65 (d, *J* = 7.3 Hz, 3H), 1.36 (s, 6H), 1.37 (s, 6H), 2.05 (qd, *J* = 12.2, 7.3 Hz, 1H), 2.93 (d, *J* = 13.6 Hz, 2H), 3.81 (d, *J* = 12.2 Hz, 1H), 3.83 (s, 3H), 3.92 (d, *J* = 13.6 Hz, 2H), 6.92 (d, *J* = 7.3 Hz, 2H), 7.06 (d, *J* = 7.3 Hz, 2H), 7.17-7.28 (m, 6H), 7.42 (d, *J* = 7.3 Hz, 4H); <sup>13</sup>C NMR (100 MHz, CDCl<sub>3</sub>) δ 14.13, 25.35, 25.50, 54.38, 55.35, 65.15, 83.20, 113.26, 126.76, 128.06, 128.57, 129.38, 130.75, 140.21, 158.61; HRMS (CI) *m/z* ([*M*+*H*]<sup>+</sup>) calcd for C<sub>30</sub>H<sub>39</sub>BNO<sub>3</sub>: 472.3023, found: 472.3018.

**A 96:4 mixture of (1*S*\*,2*R*\*) and (1*S*\*,2*S*\*)-*N,N*-dibenzyl-2-(4,4,5,5-tetramethyl-1,3,2-dioxaborolan-2-yl)-1-[4-(trifluoromethyl)phenyl]propan-1-amine (*syn*- and *anti*-3cb)** m.p. 165.0-166.0 °C; <sup>1</sup>H NMR (400 MHz, CDCl<sub>3</sub>) δ 0.65 (d, *J* = 7.3 Hz, 0.96×3H for *syn*-3cb), 0.77 (s, 0.04×6H for *anti*-3cb), 0.85 (s, 0.04×6H for *anti*-3cb), 1.30 (d, *J* = 7.3 Hz, 0.04×3H for *anti*-3cb), 1.36 (s, 0.96×6H for *syn*-3cb), 1.38 (s, 0.96×6H for *syn*-3cb), 2.03 (qd, *J* = 12.4, 7.3 Hz, 0.04×1H for *anti*-3cb), 2.10 (qd, *J* = 12.4, 7.3 Hz, 0.96×1H for *syn*-3cb), 2.90 (d, *J* = 13.7 Hz, 0.96×2H for *syn*-3cb), 2.93 (d, *J* = 13.7 Hz, 0.04×2H for *anti*-3cb), 3.74 (d, *J* = 12.4 Hz, 0.04×1H for *anti*-3cb), 3.93 (d, *J* = 12.4 Hz, 0.96×1H for *syn*-3cb), 3.95 (d, *J* = 13.7 Hz, 0.04×2H for *anti*-3cb), 3.96 (d, *J* = 13.7 Hz, 0.96×2H for *syn*-3cb), 7.19-7.31 (m, 8H), 7.41 (d, *J* = 7.3 Hz, 4H), 7.64 (d, *J* = 7.8 Hz, 2H); <sup>13</sup>C NMR (100 MHz, CDCl<sub>3</sub>) for *syn*-3cb: δ 13.94, 25.37, 25.49, 54.37, 65.43, 83.41, 124.56 (q, *J* = 272.2 Hz), 124.97 (q, *J* = 3.8 Hz), 127.01, 128.22, 129.31 (q, *J* = 32.6 Hz), 129.32, 129.88, 139.64, 140.92; <sup>19</sup>F NMR (373 MHz, CDCl<sub>3</sub>) δ -62.14 (s); HRMS (CI) *m/z* ([*M*+*H*]<sup>+</sup>) calcd for C<sub>30</sub>H<sub>36</sub>BF<sub>3</sub>NO<sub>2</sub>: 510.2791, found: 510.2799.

***N,N*-Dibenzyl-1-phenyl-2-(4,4,5,5-tetramethyl-1,3,2-dioxaborolan-2-yl)ethanamine (3db)** m.p. 99.0-100.0 °C; <sup>1</sup>H NMR (400 MHz, CDCl<sub>3</sub>) δ 1.04 (s, 6H), 1.10 (s, 6H), 1.41 (dd, *J* = 14.9, 10.4 Hz, 1H), 1.57 (dd, *J* = 14.9, 6.3 Hz, 1H), 3.27 (d, *J* = 14.0 Hz, 2H), 3.70 (d, *J* = 14.0 Hz, 2H), 4.08 (dd, *J* = 10.4, 6.3 Hz, 1H), 7.17-7.31 (m, 11H), 7.37 (d, *J* = 7.3 Hz, 4H); <sup>13</sup>C NMR (100 MHz, CDCl<sub>3</sub>) δ 24.73, 24.97, 53.84, 59.05, 83.19, 126.78, 126.93, 127.89, 128.25, 128.90, 128.99, 140.73, 141.42; HRMS (EI) *m/z* (*M*<sup>+</sup>) calcd for C<sub>28</sub>H<sub>34</sub>BNO<sub>2</sub>: 427.2683, found: 427.2685.

***N,N*-Dibenzyl-1-(4-methoxyphenyl)-2-(4,4,5,5-tetramethyl-1,3,2-dioxaborolan-2-yl)ethanamine (3eb)** m.p. 97.5-99.0 °C; <sup>1</sup>H NMR (400 MHz, CDCl<sub>3</sub>) δ 1.06 (s, 6H), 1.11 (s, 6H), 1.37 (dd, *J* = 15.1, 10.1 Hz, 1H), 1.55 (dd, *J* = 15.1, 6.4 Hz, 1H), 3.26 (d, *J* = 13.7 Hz, 2H), 3.68 (d, *J* = 13.7 Hz, 2H), 3.79

(s, 3H), 4.04 (dd,  $J = 10.1, 6.4$  Hz, 1H), 6.86 (d,  $J = 8.7$  Hz, 2H), 7.16-7.28 (m, 8H), 7.37 (d,  $J = 7.3$  Hz, 4H);  $^{13}\text{C}$  NMR (100 MHz,  $\text{CDCl}_3$ )  $\delta$  24.75, 25.00, 53.74, 55.39, 58.32, 83.16, 113.15, 126.75, 128.23, 128.97, 129.89, 133.60, 140.79, 158.53; HRMS (CI)  $m/z$  ( $[\text{M}+\text{H}]^+$ ) calcd for  $\text{C}_{29}\text{H}_{37}\text{BNO}_3$ : 458.2866, found: 458.2864.

***N,N*-Dibenzyl-2-(4,4,5,5-tetramethyl-1,3,2-dioxaborolan-2-yl)-1-[4-(trifluoromethyl)phenyl]ethanamine (3fb)** m.p. 118.0-119.0 °C;  $^1\text{H}$  NMR (400 MHz,  $\text{CDCl}_3$ )  $\delta$  1.05 (s, 6H), 1.11 (s, 6H), 1.40 (dd,  $J = 15.1, 10.1$  Hz, 1H), 1.59 (dd,  $J = 15.1, 6.0$  Hz, 1H), 3.29 (d,  $J = 13.7$  Hz, 2H), 3.68 (d,  $J = 13.7$  Hz, 2H), 4.12 (dd,  $J = 10.1, 6.0$  Hz, 1H), 7.20 (t,  $J = 7.3$  Hz, 2H), 7.28 (t,  $J = 7.3$  Hz, 4H), 7.35 (d,  $J = 7.3$  Hz, 4H), 7.42 (d,  $J = 8.2$  Hz, 2H), 7.57 (d,  $J = 8.2$  Hz, 2H);  $^{13}\text{C}$  NMR (100 MHz,  $\text{CDCl}_3$ )  $\delta$  24.72, 24.91, 53.85, 58.66, 83.38, 124.55 (q,  $J = 272.2$  Hz), 124.85 (q,  $J = 3.8$  Hz), 127.02, 128.38, 128.96, 129.06, 129.14 (q,  $J = 31.6$  Hz), 140.21, 146.10;  $^{19}\text{F}$  NMR (373 MHz,  $\text{CDCl}_3$ )  $\delta$  -62.15 (s); HRMS (EI)  $m/z$  ( $\text{M}^+$ ) calcd for  $\text{C}_{29}\text{H}_{33}\text{BF}_3\text{NO}_2$ : 495.2556, found: 495.2554.

***N,N*-Dibenzyl-1-(2-bromophenyl)-2-(4,4,5,5-tetramethyl-1,3,2-dioxaborolan-2-yl)ethanamine (3gb)** m.p. 66.0-67.0 °C;  $^1\text{H}$  NMR (400 MHz,  $\text{CDCl}_3$ )  $\delta$  0.97 (s, 6H), 1.02 (s, 6H), 1.40 (dd,  $J = 15.1, 11.0$  Hz, 1H), 1.49 (dd,  $J = 15.1, 6.0$  Hz, 1H), 3.57 (d,  $J = 14.2$  Hz, 2H), 3.73 (d,  $J = 14.2$  Hz, 2H), 4.60 (dd,  $J = 11.0, 6.0$  Hz, 1H), 7.02 (td,  $J = 7.8, 1.8$  Hz, 1H), 7.10-7.28 (m, 11H), 7.47 (dd,  $J = 7.8, 1.8$  Hz, 1H), 7.51 (dd,  $J = 7.8, 1.4$  Hz, 1H);  $^{13}\text{C}$  NMR (100 MHz,  $\text{CDCl}_3$ )  $\delta$  24.60, 24.77, 55.02, 61.10, 83.22, 126.23, 126.61, 127.02, 128.04, 128.38, 128.92, 129.85, 133.05, 140.77, 142.43; HRMS (EI)  $m/z$  ( $\text{M}^+$ ) calcd for  $\text{C}_{28}\text{H}_{33}\text{BBrNO}_2$ : 505.1788, found: 505.1790.

***N,N*-Dibenzyl-1-(naphthalen-2-yl)-2-(4,4,5,5-tetramethyl-1,3,2-dioxaborolan-2-yl)ethanamine (3hb)** oil;  $^1\text{H}$  NMR (400 MHz,  $\text{CDCl}_3$ )  $\delta$  1.00 (s, 6H), 1.07 (s, 6H), 1.51 (dd,  $J = 15.1, 10.5$  Hz, 1H), 1.66 (dd,  $J = 15.1, 6.0$  Hz, 1H), 3.39 (d,  $J = 13.7$  Hz, 2H), 3.68 (d,  $J = 13.7$  Hz, 2H), 4.25 (dd,  $J = 10.5, 6.0$  Hz, 1H), 7.19 (t,  $J = 7.3$  Hz, 2H), 7.28 (t,  $J = 7.3$  Hz, 4H), 7.37 (d,  $J = 7.3$  Hz, 4H), 7.41-7.46 (m, 2H), 7.54 (dd,  $J = 8.7, 1.8$  Hz, 1H), 7.69 (s, 1H), 7.80-7.82 (m, 3H);  $^{13}\text{C}$  NMR (100 MHz,  $\text{CDCl}_3$ )  $\delta$  24.78, 24.91, 53.86, 59.00, 83.22, 125.60, 125.89, 126.84 (two signals are overlapped.), 127.50, 127.70, 127.90, 128.07, 128.27, 129.06, 132.77, 133.16, 139.85, 140.67; HRMS (EI)  $m/z$  ( $\text{M}^+$ ) calcd for  $\text{C}_{32}\text{H}_{36}\text{BNO}_2$ : 477.2839, found: 477.2836.

**(1*S*\*,2*S*\*)-*N,N*-Diethyl-3-methoxy-1-phenyl-2-(4,4,5,5-tetramethyl-1,3,2-dioxaborolan-2-yl)pro**

**pan-1-amine (3ia)** m.p. 50.0-51.0 °C; <sup>1</sup>H NMR (400 MHz, CDCl<sub>3</sub>) δ 1.06 (t, *J* = 7.3 Hz, 6H), 1.30 (s, 6H), 1.31 (s, 6H), 1.91 (qd, *J* = 12.8, 7.3 Hz, 2H), 2.38 (ddd, *J* = 12.4, 10.5, 5.5 Hz, 1H), 2.67 (qd, *J* = 12.8, 7.3 Hz, 2H), 3.07 (dd, *J* = 8.3, 5.5 Hz, 1H), 3.17 (s, 3H), 3.27 (dd, *J* = 10.5, 8.3 Hz, 1H), 3.90 (d, *J* = 12.4 Hz, 1H), 7.16 (d, *J* = 7.3 Hz, 2H), 7.23 (t, *J* = 7.3 Hz, 1H), 7.30 (t, *J* = 7.3 Hz, 2H); <sup>13</sup>C NMR (100 MHz, CDCl<sub>3</sub>) δ 13.86, 25.11 (two signals are overlapped.), 43.47, 58.82, 62.16, 73.46, 83.21, 127.09, 127.95, 129.00, 137.26; HRMS (CI) *m/z* ([*M*+H]<sup>+</sup>) calcd for C<sub>20</sub>H<sub>35</sub>BNO<sub>3</sub>: 348.2710, found: 348.2707.

**(1*S*\*,2*S*\*)-*N,N*-Dibenzyl-3-methoxy-1-phenyl-2-(4,4,5,5-tetramethyl-1,3,2-dioxaborolan-2-yl)propan-1-amine (3ib)** m.p. 135.0-136.5 °C; <sup>1</sup>H NMR (400 MHz, CDCl<sub>3</sub>) δ 1.38 (s, 6H), 1.39 (s, 6H), 2.57 (ddd, *J* = 12.3, 10.9, 5.9 Hz, 1H), 2.91 (d, *J* = 13.6 Hz, 2H), 2.97 (dd, *J* = 8.2, 5.9 Hz, 1H), 3.108 (s, 3H), 3.111 (dd, *J* = 10.9, 8.2 Hz, 1H), 3.95 (d, *J* = 12.3 Hz, 1H), 3.96 (d, *J* = 13.6 Hz, 2H), 7.15 (d, *J* = 7.3 Hz, 2H), 7.18-7.38 (m, 9H), 7.41 (d, *J* = 7.3 Hz, 4H); <sup>13</sup>C NMR (100 MHz, CDCl<sub>3</sub>) δ 25.40, 25.68, 54.15, 58.72, 61.58, 73.96, 83.58, 126.88, 127.37, 128.09, 128.12, 129.41, 129.48, 136.31, 139.88; HRMS (EI) *m/z* (*M*<sup>+</sup>) calcd for C<sub>30</sub>H<sub>38</sub>BNO<sub>3</sub>: 471.2945, found: 471.2938.

An 88:12 mixture of *N,N*-dibenzyl-1-(4,4,5,5-tetramethyl-1,3,2-dioxaborolan-2-yl)octan-2-amine (**3jb**) and *N,N*-dibenzyl-2-(4,4,5,5-tetramethyl-1,3,2-dioxaborolan-2-yl)octan-1-amine (**3jb'**) oil; <sup>1</sup>H NMR (400 MHz, CDCl<sub>3</sub>) for mixture: δ 0.85 (t, *J* = 7.3 Hz, 3H), 1.17-1.29 (m, 10H), 1.22 (s, 12H), 1.36-1.48 (m, 1H), 1.54-1.63 (m, 0.88×1H for **3jb**), 2.39 (dd, *J* = 11.9, 7.3 Hz, 0.12×1H for **3jb'**), 2.58 (dd, *J* = 11.9, 8.2 Hz, 0.12×1H for **3jb'**), 2.83-2.90 (m, 0.88×1H for **3jb**), 3.38 (d, *J* = 13.7 Hz, 0.88×2H for **3jb**), 3.45 (d, *J* = 13.7 Hz, 0.12×2H for **3jb'**), 3.57 (d, *J* = 13.7 Hz, 0.12×2H for **3jb'**), 3.64 (d, *J* = 13.7 Hz, 0.88×2H for **3jb**), 7.18 (t, *J* = 7.3 Hz, 2H), 7.26 (t, *J* = 7.3 Hz, 4H), 7.36 (d, *J* = 7.3 Hz, 4H); <sup>13</sup>C NMR (100 MHz, CDCl<sub>3</sub>) for **3jb**: δ 14.35, 22.89, 24.96, 25.14, 26.94, 29.42, 32.07, 33.81, 53.52, 54.69, 83.08, 126.68, 128.68, 129.21, 140.98; HRMS (EI) *m/z* (*M*<sup>+</sup>) calcd for C<sub>28</sub>H<sub>42</sub>BNO<sub>2</sub>: 435.3309, found: 435.3305.

**(1*S*\*,2*R*\*)-*N,N*-Dibenzyl-1-(3-chlorophenyl)-3-methyl-2-(4,4,5,5-tetramethyl-1,3,2-dioxaborolan-2-yl)butan-1-amine (3kb)** m.p. 139.0-140.0 °C; <sup>1</sup>H NMR (400 MHz, CDCl<sub>3</sub>) δ 0.66 (d, *J* = 6.9 Hz, 3H), 0.90 (d, *J* = 6.9 Hz, 3H), 1.28-1.34 (m, 1H), 1.37 (s, 6H), 1.40 (s, 6H), 2.11 (dd, *J* = 12.8, 4.1 Hz, 1H), 2.89 (d, *J* = 13.7 Hz, 2H), 3.98 (d, *J* = 13.7 Hz, 2H), 4.08 (d, *J* = 12.8 Hz, 1H), 6.99 (dm, *J* = 6.4 Hz, 1H), 7.18-7.31 (m, 9H), 7.41 (d, *J* = 7.3 Hz, 4H); <sup>13</sup>C NMR (100 MHz, CDCl<sub>3</sub>) δ 18.21, 23.77,

25.98, 26.08, 27.19, 54.54, 62.63, 83.43, 126.81, 127.24, 127.78, 128.09, 129.12, 129.37, 129.70, 134.00, 138.52, 139.60; HRMS (CI)  $m/z$  ( $[M+H]^+$ ) calcd for  $C_{31}H_{40}BClNO_2$ : 504.2841, found: 504.2834.

**A** **90:10** **mixture** **of**  
*N,N*-dibenzyl-1-cyclohexyl-2-(4,4,5,5-tetramethyl-1,3,2-dioxaborolan-2-yl)ethanamine (**3lb**) and *N,N*-dibenzyl-2-cyclohexyl-2-(4,4,5,5-tetramethyl-1,3,2-dioxaborolan-2-yl)ethanamine (**3lb'**) oil;  
 $^1H$  NMR (400 MHz,  $CDCl_3$ ) for **3lb**:  $\delta$  0.67-0.83 (m, 3H), 1.02-1.17 (m, 3H), 1.22 (s, 6H), 1.25 (s, 6H), 1.35-1.43 (m, 1H), 1.56-1.67 (m, 5H), 2.28-2.31 (m, 1H), 2.58-2.63 (m, 1H), 3.29 (d,  $J = 13.7$  Hz, 2H), 3.71 (d,  $J = 13.7$  Hz, 2H), 7.19 (t,  $J = 7.3$  Hz, 2H), 7.27 (t,  $J = 7.3$  Hz, 4H), 7.37 (d,  $J = 7.3$  Hz, 4H);  
 $^{13}C$  NMR (100 MHz,  $CDCl_3$ ) for **3lb**:  $\delta$  24.99, 25.02, 26.85, 31.11, 31.14, 42.02, 54.17, 59.99, 83.06, 126.66, 128.10, 129.36, 140.94; HRMS (CI)  $m/z$  ( $[M+H]^+$ ) calcd for  $C_{28}H_{41}BNO_2$ : 434.3231, found: 434.3232.

**(1*S*\*,2*R*\*)**-{2-[1-(*N,N*-Diethylammonio)-1-phenyl]propyl}trifluoroborate (**3aa-BF<sub>3</sub>**) m.p. 132.0-133.0 °C;  $^1H$  NMR (400 MHz,  $CDCl_3$ )  $\delta$  0.73 (d,  $J = 7.3$  Hz, 3H), 1.36 (t,  $J = 7.3$  Hz, 3H), 1.48 (m, 1H), 1.59 (t,  $J = 7.3$  Hz, 3H), 2.15-2.26 (m, 1H), 2.83-2.94 (m, 1H), 3.11 (qd,  $J = 12.8, 7.3$  Hz, 1H), 3.58 (qd,  $J = 12.8, 7.3$  Hz, 1H), 4.41 (d,  $J = 12.3$  Hz, 1H), 7.27-7.45 (m, 5H), 7.58 (bs, 1H);  $^{13}C$  NMR (100 MHz,  $CDCl_3$ )  $\delta$  10.94, 11.43, 13.13, 13.15, 45.69, 45.72, 72.22, 129.28, 130.16, 130.90, 130.92;  $^{19}F$  NMR (373 MHz,  $CDCl_3$ )  $\delta$  -143.14 (s); HRMS (FAB)  $m/z$  ( $[M-F]^+$ ) calcd for  $C_{13}H_{21}BF_2N$ : 240.1735, found: 240.1730.

**(1*S*\*,2*R*\*)**-{2-[1-(*N*-Benzyl-*N*-methyllummonio)-1-phenyl]propyl}trifluoroborate (**3ac-BF<sub>3</sub>**) (diastereomixture associated with the chirality on nitrogen) m.p. 141.0-142.0 °C;  $^1H$  NMR (400 MHz,  $CDCl_3$ )  $\delta$  0.74 (d,  $J = 7.3$  Hz, 0.5×3H), 0.77 (d,  $J = 7.3$  Hz, 0.5×3H), 1.48 (m, 0.5×1H), 1.68 (m, 0.5×1H), 2.43 (s, 0.5×3H), 2.56 (s, 0.5×3H), 3.09 (d,  $J = 12.8$  Hz, 0.5×1H), 3.66 (d,  $J = 12.8$  Hz, 0.5×1H), 4.40 (d,  $J = 12.8$  Hz, 0.5×1H), 4.46 (d,  $J = 12.8$  Hz, 0.5×1H), 4.50 (d,  $J = 12.8$  Hz, 0.5×1H), 4.80 (d,  $J = 12.8$  Hz, 0.5×1H), 7.26-7.52 (m, 10H), 8.52 (bs, 1H);  $^{13}C$  NMR (100 MHz,  $CDCl_3$ )  $\delta$  13.11, 13.13, 13.35, 13.37, 31.16, 34.22, 39.46, 54.50, 61.00, 78.96, 129.03, 129.13, 129.19, 129.27, 129.42, 129.62, 129.84, 130.10, 130.42, 130.45 (three signals are overlapped.), 130.57, 130.63 (three signals are overlapped.);  $^{19}F$  NMR (373 MHz,  $CDCl_3$ )  $\delta$  -143.53 (s), -142.66 (s); HRMS (FAB)  $m/z$  ( $[M-F]^+$ ) calcd for  $C_{17}H_{21}BF_2N$ : 288.1735, found: 288.1737.

**(1*S*\*,2*R*\*)-[2-(1-Phenyl-1-piperidiniumyl)propyl]trifluoroborate (3ae-BF<sub>3</sub>)** m.p. 148.0-149.0 °C; <sup>1</sup>H NMR (400 MHz, CDCl<sub>3</sub>) δ 0.71 (d, *J* = 7.3 Hz, 3H), 1.12-1.23 (m, 1H), 1.45-1.53 (m, 1H), 1.76-1.94 (m, 5H), 2.18-2.29 (m, 1H), 2.58-2.67 (m, 1H), 3.47 (d, *J* = 12.8 Hz, 1H), 3.71 (d, *J* = 12.8 Hz, 1H), 4.17 (d, *J* = 12.8 Hz, 1H), 7.27-7.46 (m, 5H), 7.67 (bs, 1H); <sup>13</sup>C NMR (100 MHz, CDCl<sub>3</sub>) δ 13.14, 13.16, 22.18, 24.13, 24.76, 48.35, 54.02, 78.03, 129.21, 130.11, 131.21, 131.23; <sup>19</sup>F NMR (373 MHz, CDCl<sub>3</sub>) δ -144.30 (s); HRMS (FAB) *m/z* ([*M-F*]<sup>+</sup>) calcd for C<sub>14</sub>H<sub>21</sub>BF<sub>2</sub>N: 252.1735, found: 252.1739.

**(1*S*\*,2*R*\*)-[2-(1-Azepaniumyl-1-phenyl)propyl]trifluoroborate (3af-BF<sub>3</sub>)** m.p. 136.0-137.0 °C; <sup>1</sup>H NMR (400 MHz, CDCl<sub>3</sub>) δ 0.70 (d, *J* = 7.3 Hz, 3H), 1.45-1.55 (m, 3H), 1.73-1.94 (m, 6H), 2.46 (m, 1H), 2.92 (m, 1H), 3.59-3.72 (m, 2H), 4.28 (d, *J* = 12.4 Hz, 1H), 7.37-7.45 (m, 5H), 7.89 (bs, 1H); <sup>13</sup>C NMR (100 MHz, CDCl<sub>3</sub>) δ 13.02, 13.04, 24.91, 25.19, 25.51, 25.60, 49.41, 56.89, 79.10, 129.16, 130.06, 131.29, 131.31; <sup>19</sup>F NMR (373 MHz, CDCl<sub>3</sub>) δ -143.69 (s); HRMS (FAB) *m/z* ([*M-F*]<sup>+</sup>) calcd for C<sub>15</sub>H<sub>23</sub>BF<sub>2</sub>N: 266.1892, found: 266.1890.

**(1*S*\*,2*S*\*)-{2-[1-(*N,N*-Diethylammonio)-1-phenyl-3-methoxy]propyl}trifluoroborate (3ia-BF<sub>3</sub>)** m.p. 109.0-110.0 °C; <sup>1</sup>H NMR (400 MHz, CDCl<sub>3</sub>) δ 1.33 (t, *J* = 7.3 Hz, 3H), 1.55 (t, *J* = 7.3 Hz, 3H), 1.70 (m, 1H), 2.34-2.44 (m, 1H), 2.97-3.04 (m, 1H), 3.05 (s, 3H), 3.13-3.19 (m, 1H), 3.23-3.27 (m, 1H), 3.55 (dd, *J* = 10.6, 6.0 Hz, 2H), 4.77 (d, *J* = 11.0 Hz, 1H), 7.18 (bs, 1H), 7.37-7.40 (m, 2H), 7.42-7.44 (m, 3H); <sup>13</sup>C NMR (100 MHz, CDCl<sub>3</sub>) δ 10.65, 11.18, 45.71, 45.92, 58.83, 70.43, 72.63, 72.65, 128.99, 129.90, 130.92 (two signals are overlapped.); <sup>19</sup>F NMR (373 MHz, CDCl<sub>3</sub>) δ -140.24 (s); HRMS (FAB) *m/z* ([*M-F*]<sup>+</sup>) calcd for C<sub>14</sub>H<sub>23</sub>BF<sub>2</sub>NO: 270.1841, found: 270.1847.

**(1*R*\*,2*R*\*)-1-(*N,N*-Diethylamino)-1-phenylpropan-2-ol (4aa)** oil; <sup>1</sup>H NMR (400 MHz, CDCl<sub>3</sub>) δ 1.03 (d, *J* = 6.0 Hz, 3H), 1.10 (t, *J* = 7.3 Hz, 6H), 2.10 (qd, *J* = 12.8, 7.3 Hz, 2H), 2.71 (qd, *J* = 12.8, 7.3 Hz, 2H), 3.40 (d, *J* = 10.1 Hz, 1H), 4.15 (qd, *J* = 10.1, 6.0 Hz, 1H), 4.59 (bs, 1H), 7.14 (d, *J* = 7.8 Hz, 2H), 7.26-7.35 (m, 3H); <sup>13</sup>C NMR (100 MHz, CDCl<sub>3</sub>) δ 14.30, 19.81, 43.50, 64.03, 70.90, 127.76, 128.28, 129.75, 135.61; HRMS (CI) *m/z* ([*M+H*]<sup>+</sup>) calcd for C<sub>13</sub>H<sub>22</sub>NO: 208.1701, found: 208.1701.

**(1*R*\*,2*R*\*)-1-(*N,N*-Dibenzylamino)-1-phenylpropan-2-ol (*syn*-4ab)** oil; <sup>1</sup>H NMR (400 MHz, CDCl<sub>3</sub>) δ 0.92 (d, *J* = 6.0 Hz, 3H), 3.03 (d, *J* = 13.3 Hz, 2H), 3.40 (d, *J* = 10.1 Hz, 1H), 3.95 (d, *J* =

13.3 Hz, 2H), 4.37 (qd,  $J = 10.1, 6.0$  Hz, 1H), 4.39 (bs, 1H), 7.20 (d,  $J = 7.3$  Hz, 2H), 7.24-7.28 (m, 2H), 7.30-7.45 (m, 11H);  $^{13}\text{C}$  NMR (100 MHz,  $\text{CDCl}_3$ )  $\delta$  19.84, 53.84, 64.40, 69.46, 127.51, 128.11, 128.52, 128.82, 129.24, 130.11, 134.33, 138.95; HRMS (CI)  $m/z$  ( $[\text{M}+\text{H}]^+$ ) calcd for  $\text{C}_{23}\text{H}_{26}\text{NO}$ : 332.2014, found: 332.2012.

**(1*R*\*,2*S*\*)-1-(*N,N*-Dibenzylamino)-1-phenylpropan-2-ol (*anti*-4ab)** m.p. 115.0-116.0 °C;  $^1\text{H}$  NMR (400 MHz,  $\text{CDCl}_3$ )  $\delta$  1.43 (d,  $J = 6.4$  Hz, 3H), 3.07 (d,  $J = 13.7$  Hz, 2H), 3.50 (d,  $J = 8.7$  Hz, 1H), 3.85 (d,  $J = 13.7$  Hz, 2H), 4.49 (qd,  $J = 8.7, 6.4$  Hz, 1H), 7.22-7.46 (m, 15H);  $^{13}\text{C}$  NMR (100 MHz,  $\text{CDCl}_3$ )  $\delta$  20.91, 54.76, 67.10, 69.53, 127.22, 128.02, 128.58, 128.64, 128.98, 130.17, 135.33, 139.77; HRMS (CI)  $m/z$  ( $[\text{M}+\text{H}]^+$ ) calcd for  $\text{C}_{23}\text{H}_{26}\text{NO}$ : 332.2014, found: 332.2015.

**(1*R*\*,2*R*\*)-1-(*N,N*-Dibenzylamino)-1-(4-methoxyphenyl)propan-2-ol (4bb)** oil;  $^1\text{H}$  NMR (400 MHz,  $\text{CDCl}_3$ )  $\delta$  0.91 (d,  $J = 6.0$  Hz, 3H), 3.02 (d,  $J = 13.3$  Hz, 2H), 3.36 (d,  $J = 10.1$  Hz, 1H), 3.85 (s, 3H), 3.93 (d,  $J = 13.3$  Hz, 2H), 4.31 (qd,  $J = 10.1, 6.0$  Hz, 1H), 4.43 (bs, 1H), 6.96 (d,  $J = 8.7$  Hz, 2H), 7.12 (d,  $J = 8.7$  Hz, 2H), 7.24-7.28 (m, 2H), 7.29-7.36 (m, 8H);  $^{13}\text{C}$  NMR (100 MHz,  $\text{CDCl}_3$ )  $\delta$  19.87, 53.83, 55.44, 64.56, 68.81, 113.87, 126.31, 127.48, 128.80, 129.24, 131.14, 139.03, 159.38; HRMS (CI)  $m/z$  ( $[\text{M}+\text{H}]^+$ ) calcd for  $\text{C}_{24}\text{H}_{28}\text{NO}_2$ : 362.2120, found: 362.2116.

**(1*R*\*,2*S*\*)-1-(Piperidin-1-yl)-2,3-dihydroinden-2-ol (4me)** m.p. 102.0-103.0 °C;  $^1\text{H}$  NMR (400 MHz,  $\text{CDCl}_3$ )  $\delta$  1.40-1.43 (m, 2H), 1.51-1.67 (m, 4H), 2.37 (m, 2H), 2.55 (m, 2H), 2.76 (dd,  $J = 16.5, 7.8$  Hz, 1H), 3.29 (dd,  $J = 16.5, 8.2$  Hz, 1H), 4.04 (d,  $J = 7.8$  Hz, 1H), 4.44 (ddd,  $J = 8.2, 7.8, 7.8$  Hz, 1H), 5.01 (bs, 1H), 7.19-7.27 (m, 3H), 7.31-7.33 (m, 1H);  $^{13}\text{C}$  NMR (100 MHz,  $\text{CDCl}_3$ )  $\delta$  24.29, 26.82, 41.99, 52.81, 69.16, 70.97, 125.68, 126.57, 126.59, 128.60, 139.16, 141.90; HRMS (EI)  $m/z$  ( $\text{M}^+$ ) calcd for  $\text{C}_{14}\text{H}_{19}\text{NO}$ : 217.1467, found: 217.1470.

***tert*-Butyl [(1*R*\*,2*R*\*)-1-(*N,N*-diethylamino)-1-phenylpropan-2-yl]carbamate (5aa)** oil;  $^1\text{H}$  NMR (400 MHz,  $\text{CDCl}_3$ )  $\delta$  1.01 (d,  $J = 6.0$  Hz, 3H), 1.04 (t,  $J = 6.9$  Hz, 6H), 1.48 (s, 9H), 2.11 (qd,  $J = 13.3, 6.9$  Hz, 2H), 2.61 (qd,  $J = 13.3, 6.9$  Hz, 2H), 3.48 (d,  $J = 10.1$  Hz, 1H), 3.95-4.03 (m, 1H), 5.45 (bs, 1H), 7.18 (d,  $J = 7.3$  Hz, 2H), 7.26-7.34 (m, 3H);  $^{13}\text{C}$  NMR (100 MHz,  $\text{CDCl}_3$ )  $\delta$  13.60, 18.97, 28.72, 43.04, 46.61, 68.31, 79.04, 127.62, 128.23, 129.51, 136.52, 156.64; HRMS (CI)  $m/z$  ( $[\text{M}+\text{H}]^+$ ) calcd for  $\text{C}_{18}\text{H}_{31}\text{N}_2\text{O}_2$ : 307.2386, found: 307.2384.

[ $^1\text{H}$  and  $^{13}\text{C}$  NMR Spectra of **3aa**]

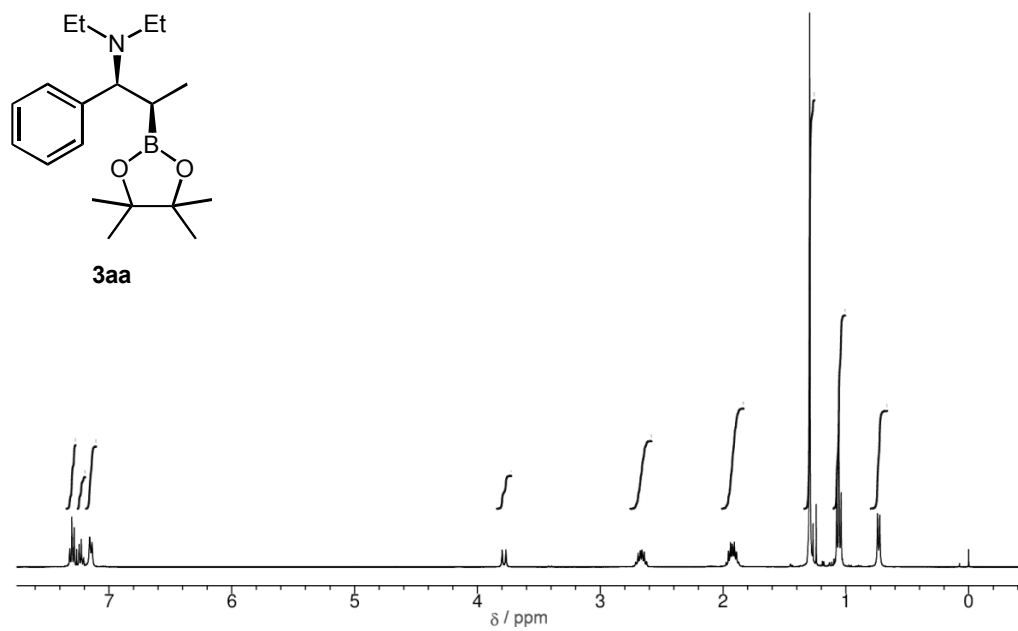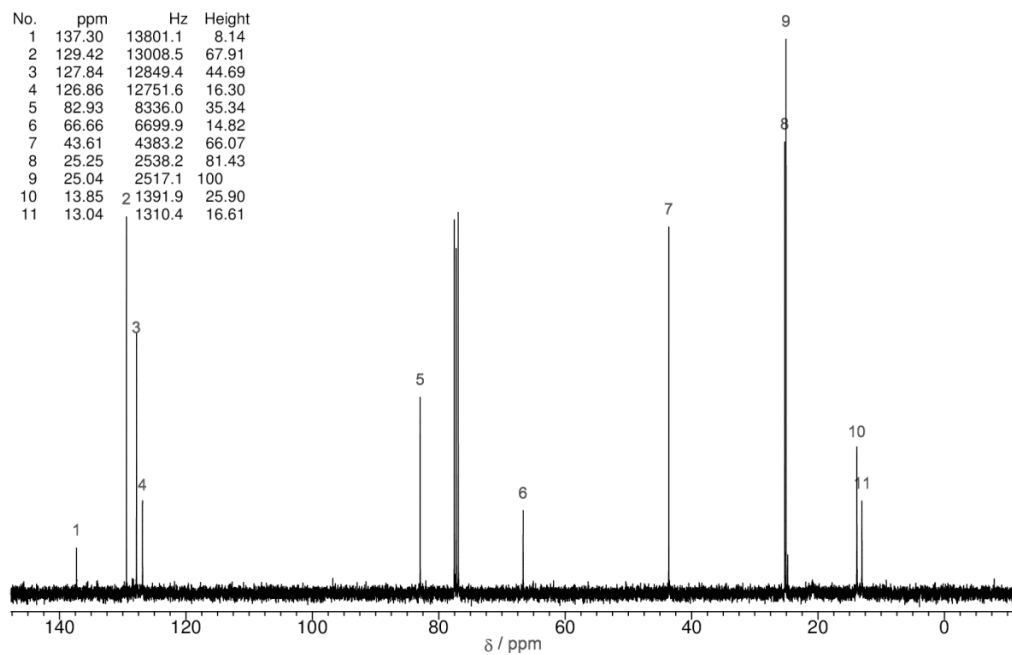

[ $^1\text{H}$  and  $^{13}\text{C}$  NMR Spectra of *syn-3ab*]

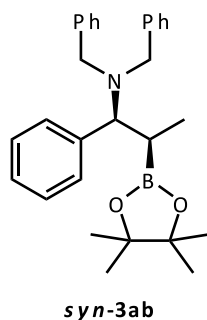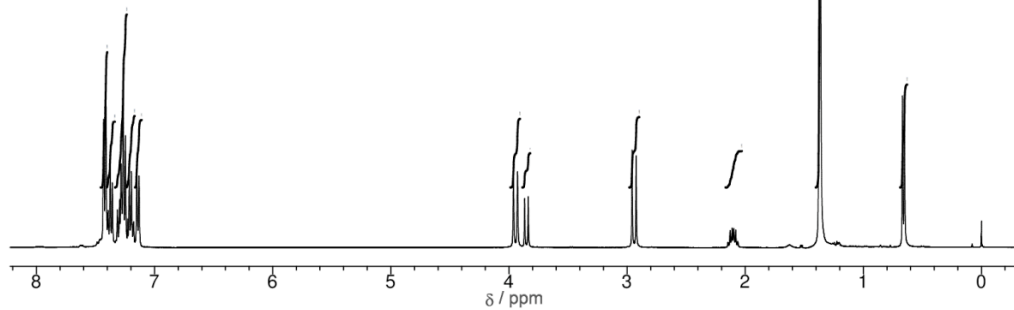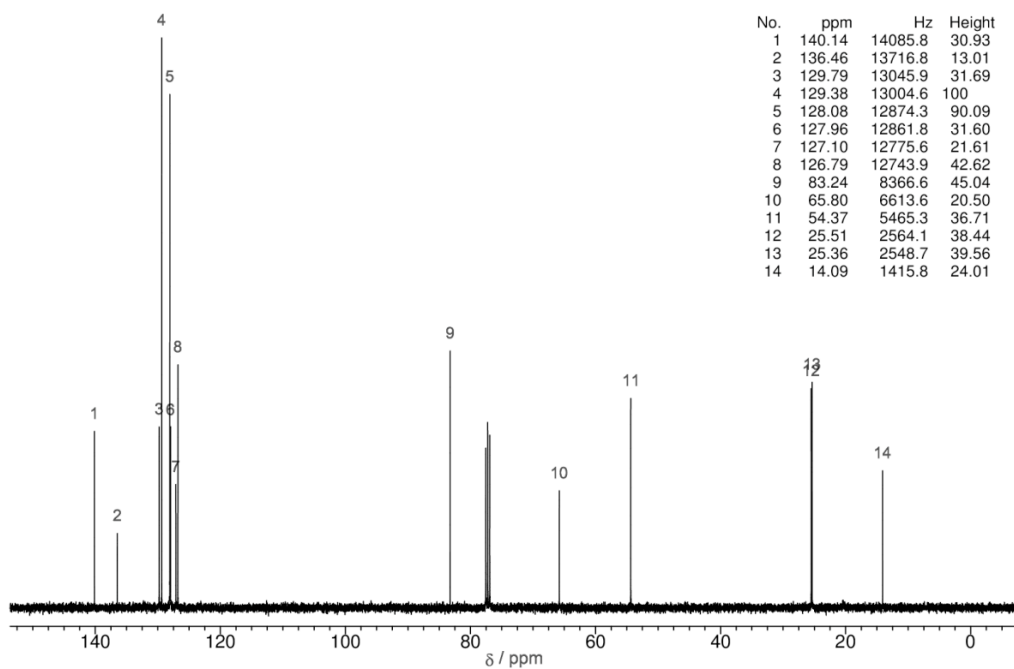

[ $^1\text{H}$  and  $^{13}\text{C}$  NMR Spectra of *anti*-3ab]

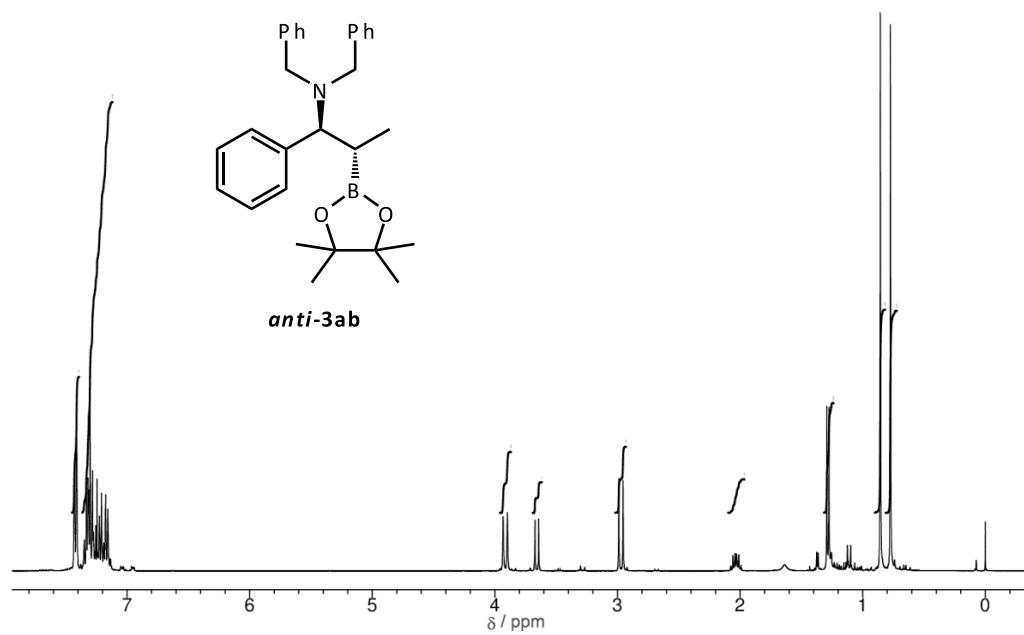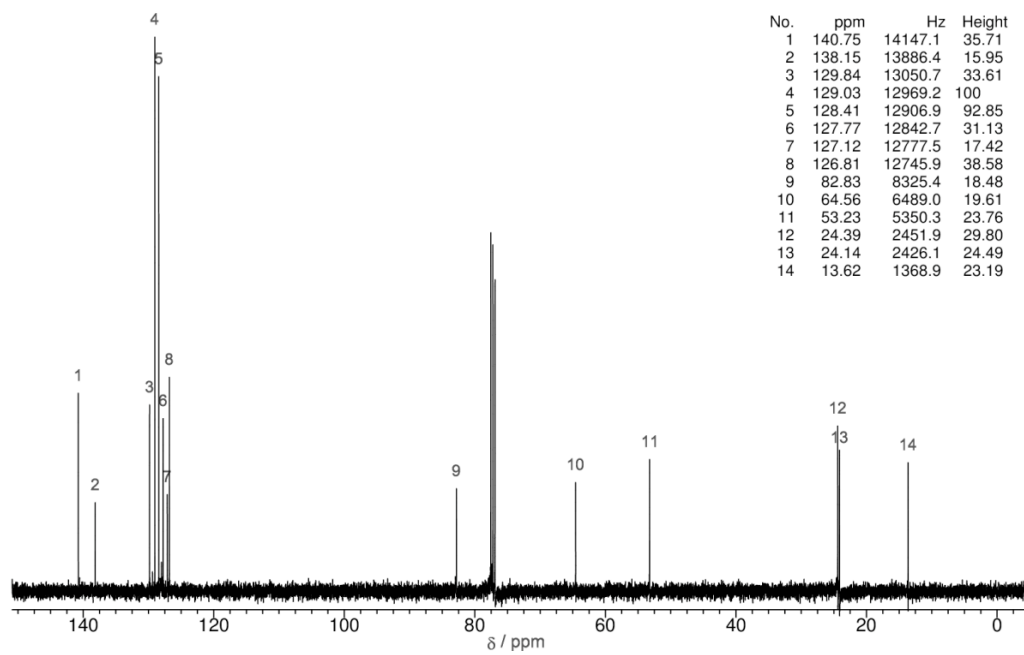

[ $^1\text{H}$  and  $^{13}\text{C}$  NMR Spectra of **3ac**]

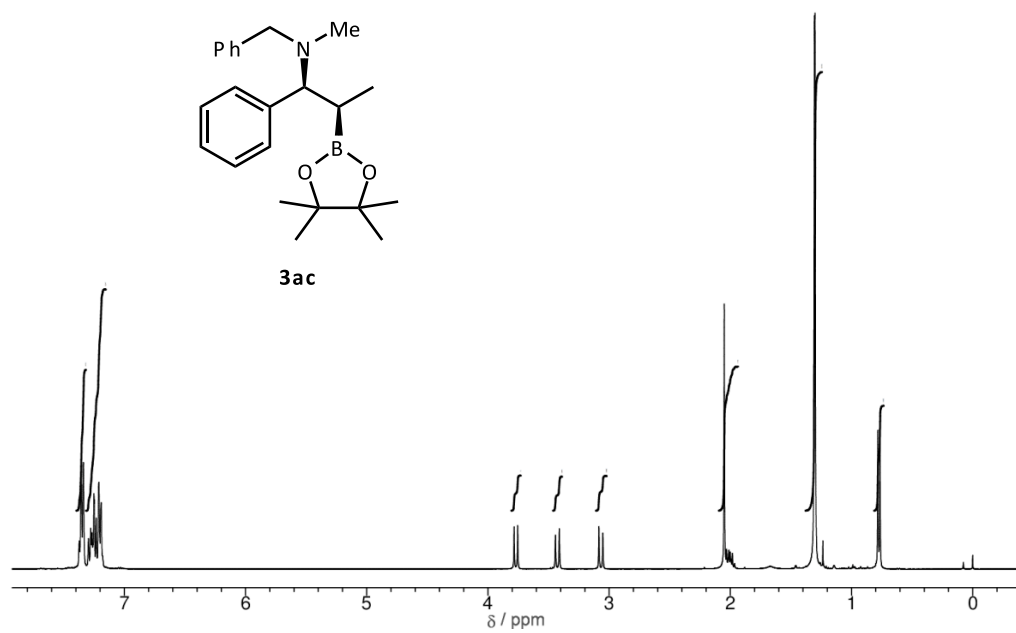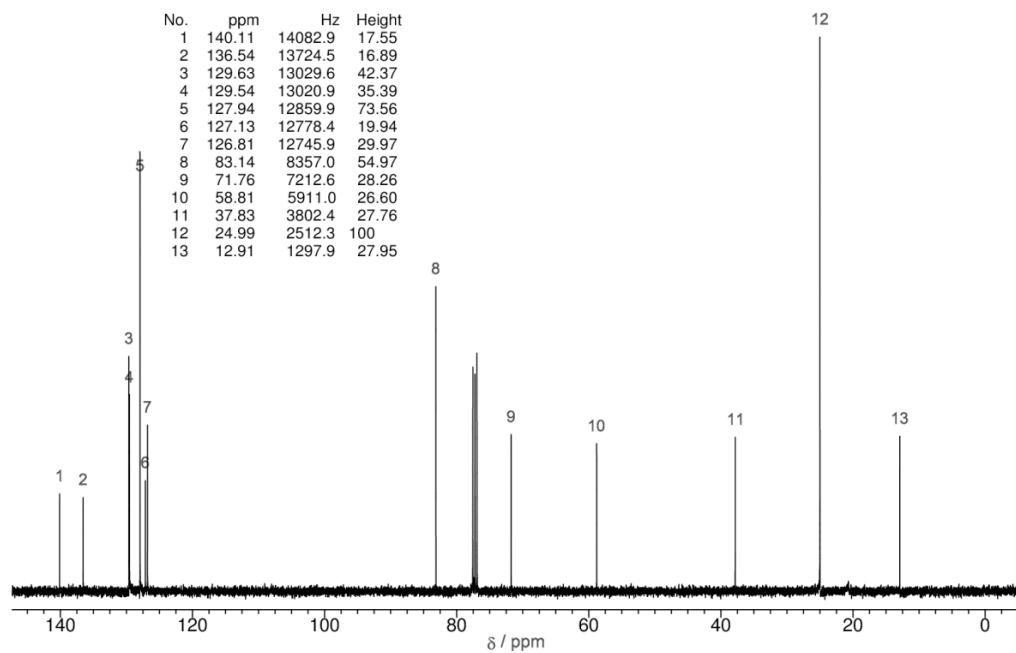

[ $^1\text{H}$  and  $^{13}\text{C}$  NMR Spectra of **3ad**]

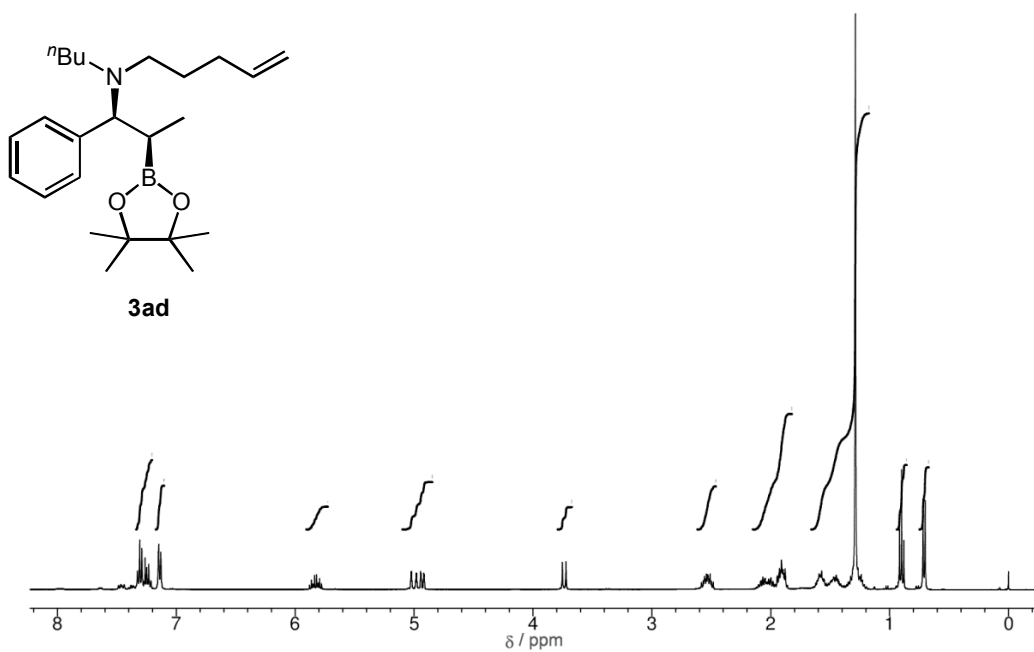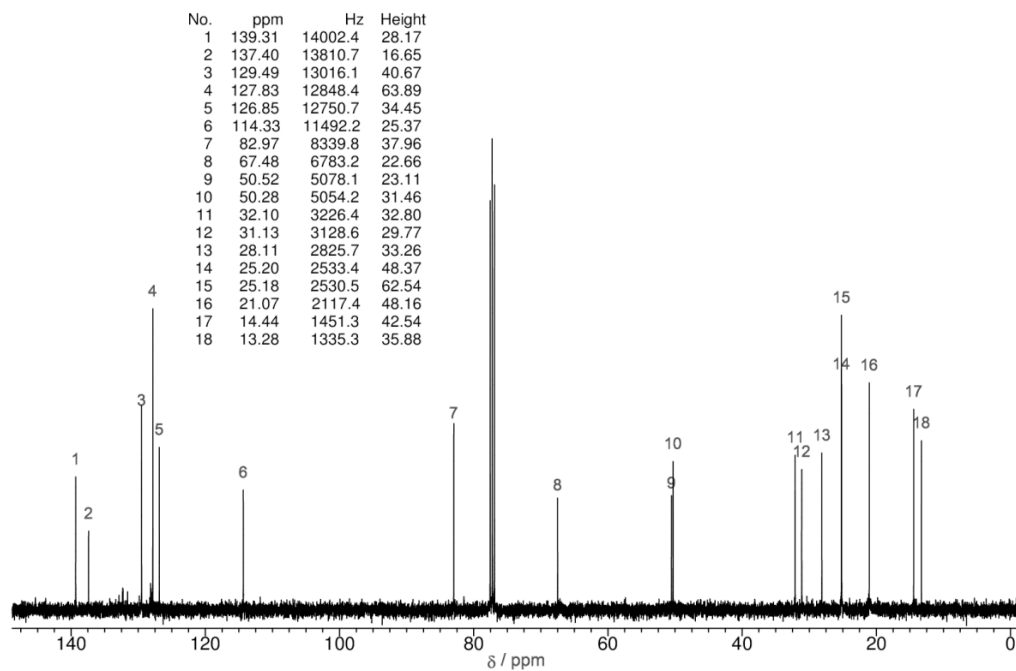

[ $^1\text{H}$  and  $^{13}\text{C}$  NMR Spectra of **3ag**]

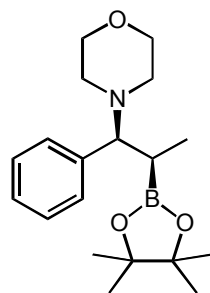

**3ag**

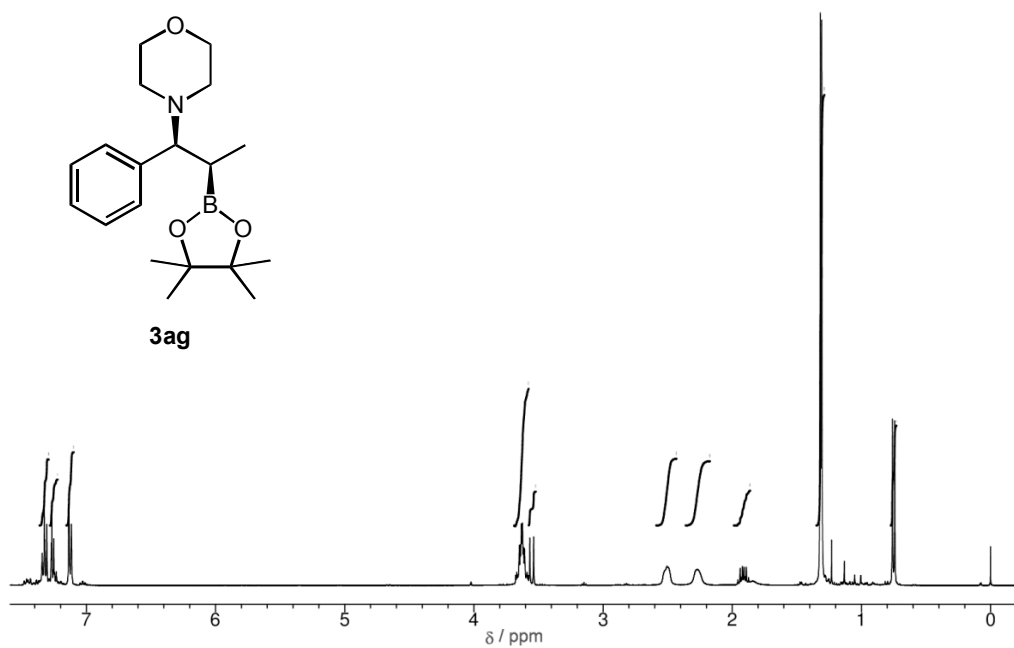

| No. | ppm    | Hz      | Height |
|-----|--------|---------|--------|
| 1   | 135.95 | 13665.0 | 23.75  |
| 2   | 129.41 | 13007.5 | 41.96  |
| 3   | 127.98 | 12863.8 | 61.40  |
| 4   | 127.32 | 12797.6 | 30.72  |
| 5   | 83.07  | 8349.4  | 81.59  |
| 6   | 73.02  | 7340.1  | 45.43  |
| 7   | 67.37  | 6771.7  | 70.81  |
| 8   | 25.36  | 2548.7  | 56.95  |
| 9   | 24.93  | 2505.6  | 52.78  |
| 10  | 12.56  | 1262.5  | 45.67  |

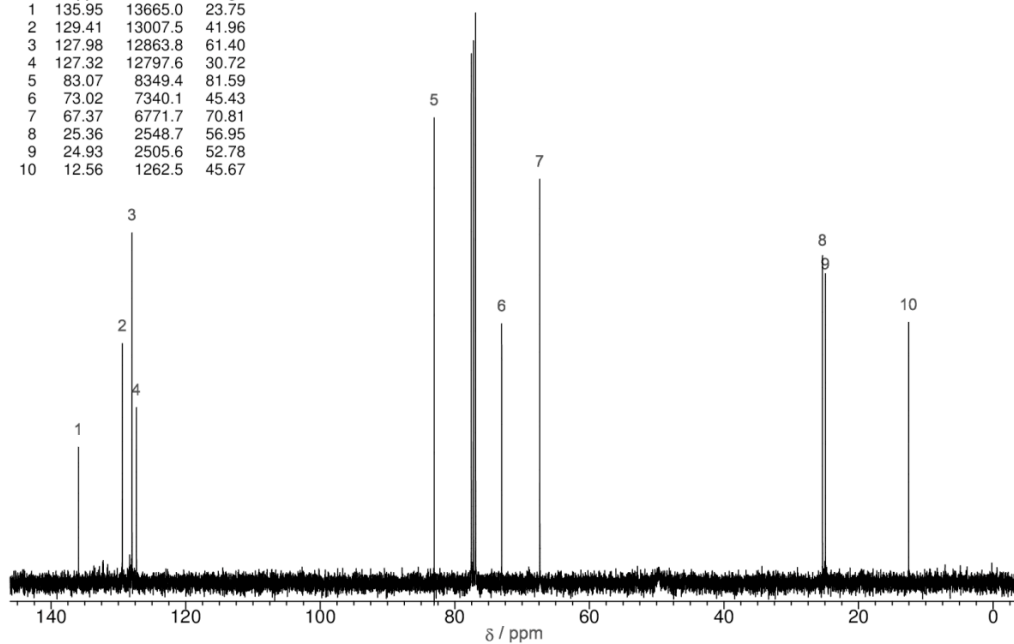

[ $^1\text{H}$  and  $^{13}\text{C}$  NMR Spectra of **3ah**]

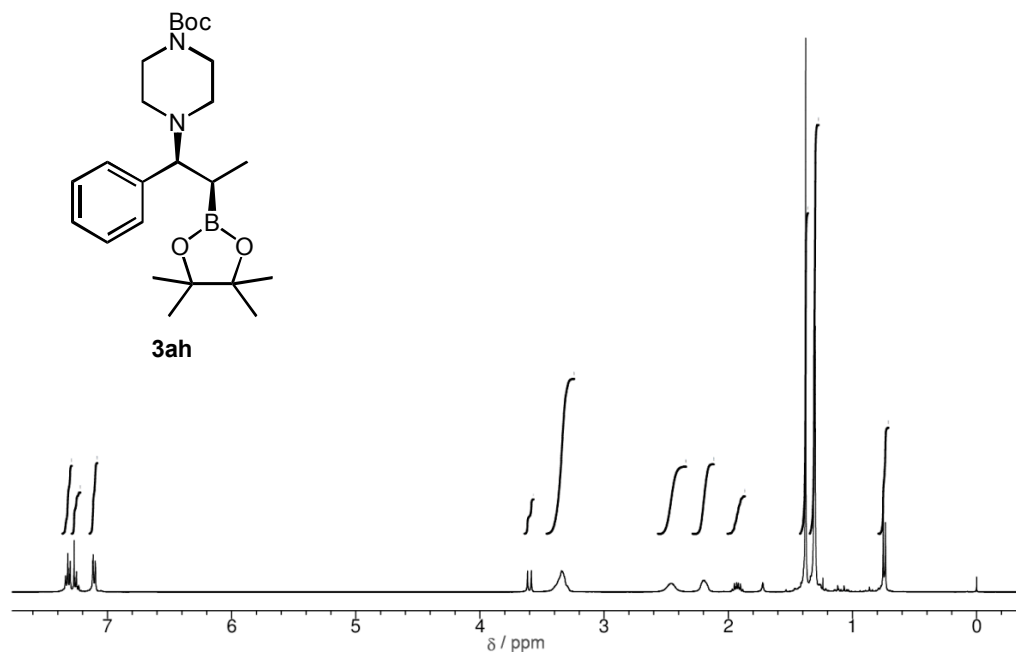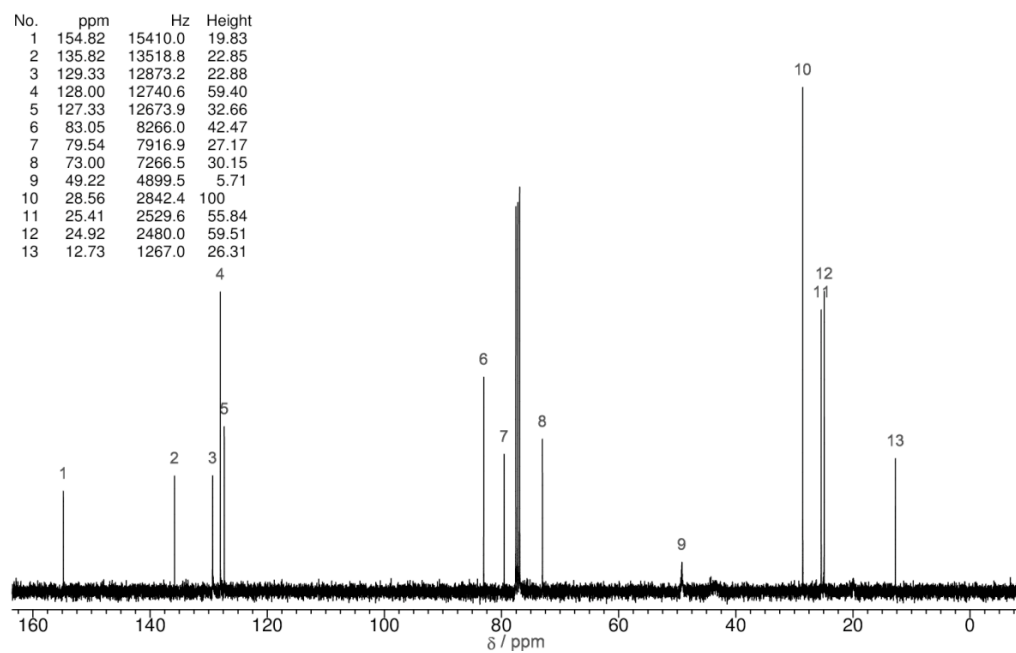

[ $^1\text{H}$  and  $^{13}\text{C}$  NMR Spectra of **3ai**]

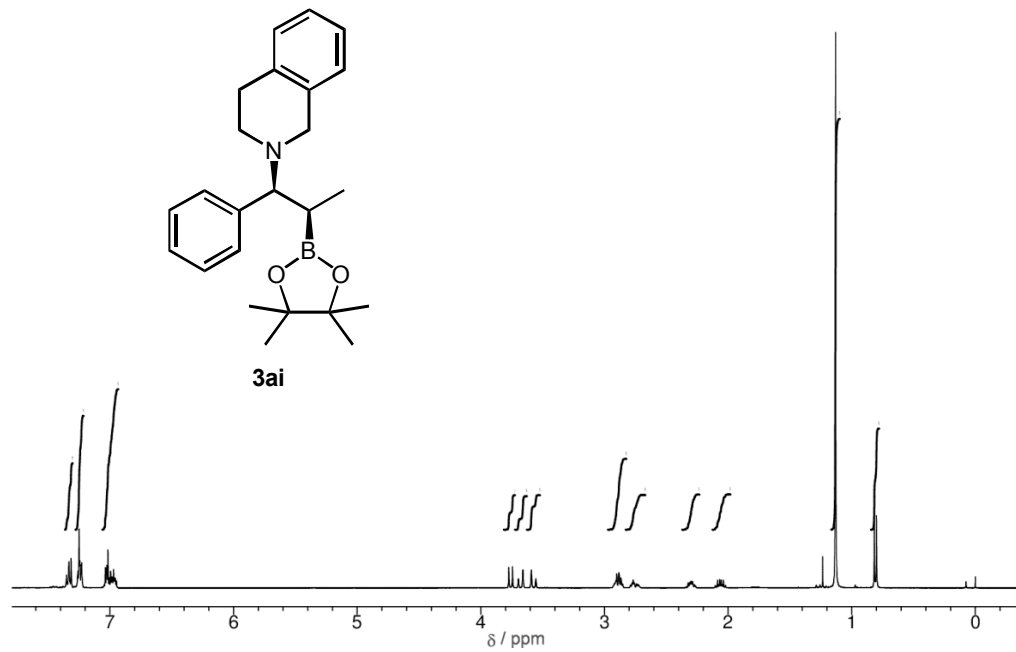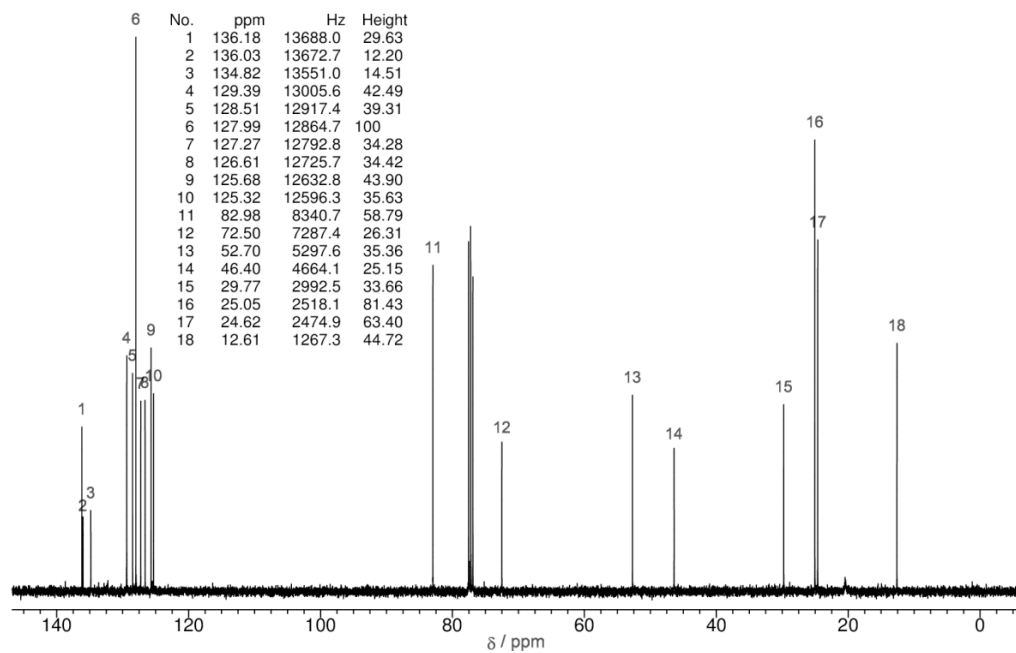

[ $^1\text{H}$  and  $^{13}\text{C}$  NMR Spectra of **3bb**]

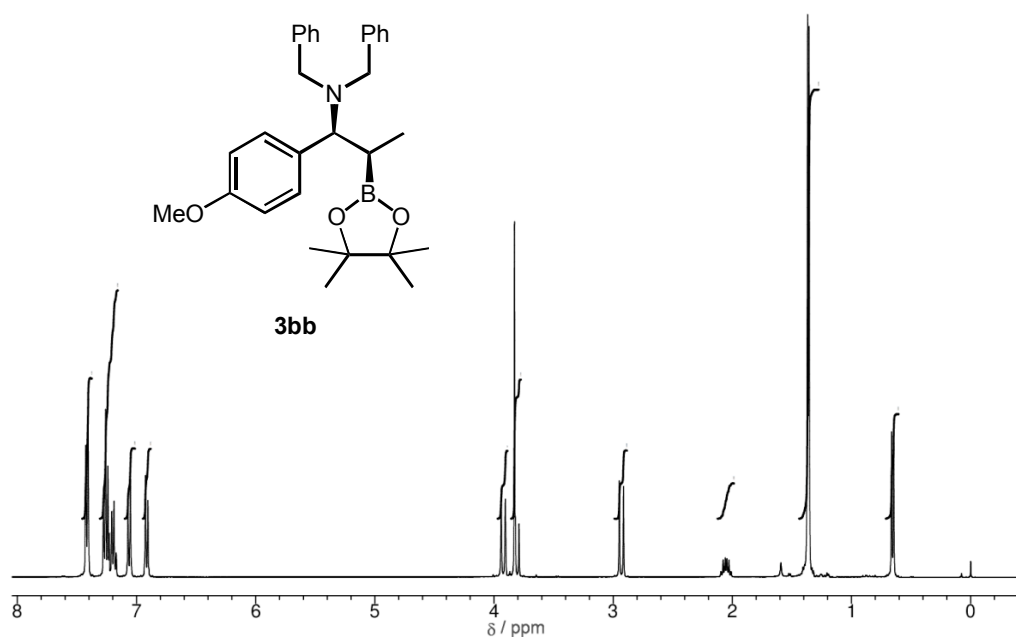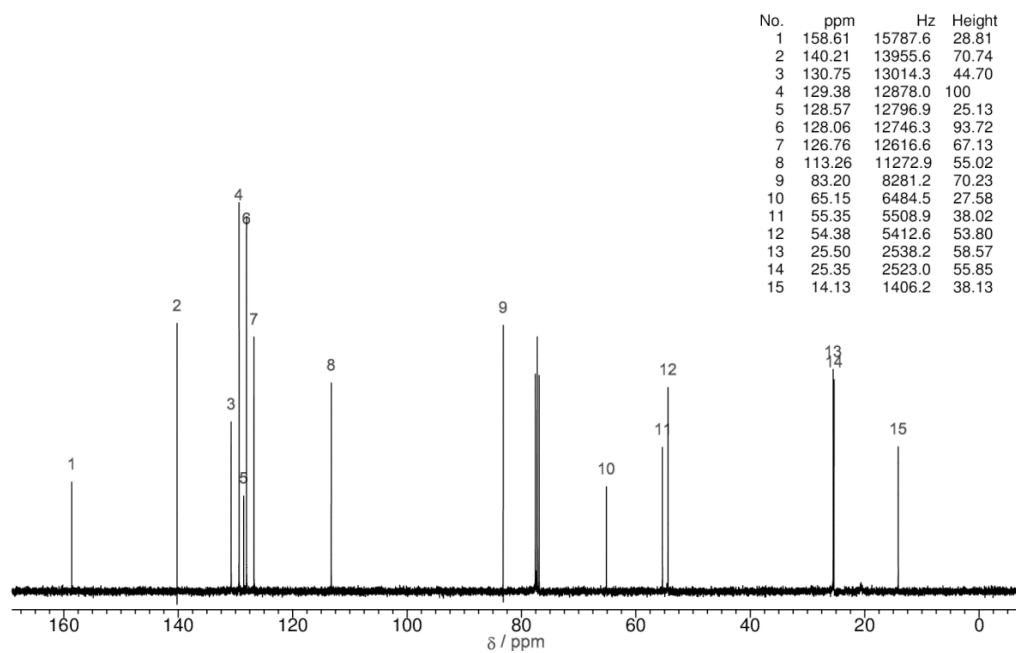

[ $^1\text{H}$ ,  $^{13}\text{C}$ , and  $^{19}\text{F}$  NMR Spectra of a 96:4 mixture of *syn*- and *anti*-3cb]

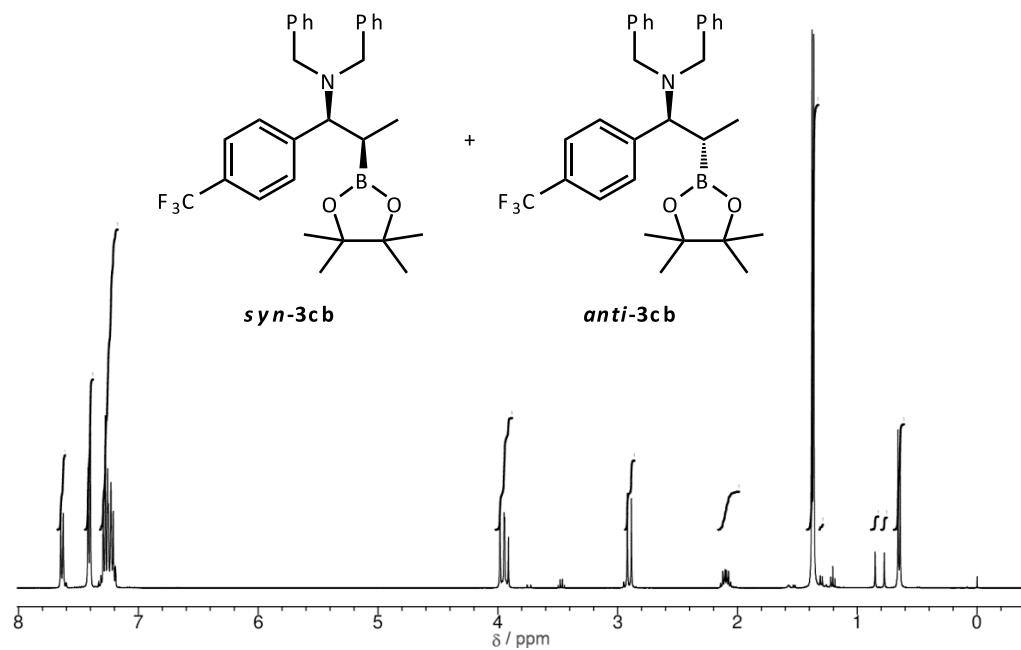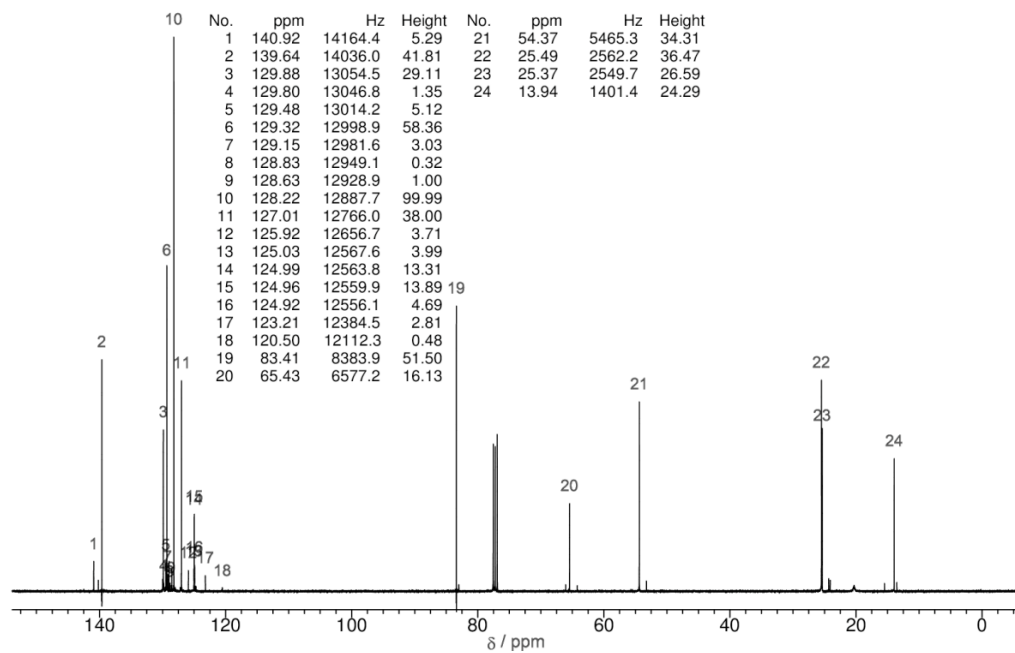

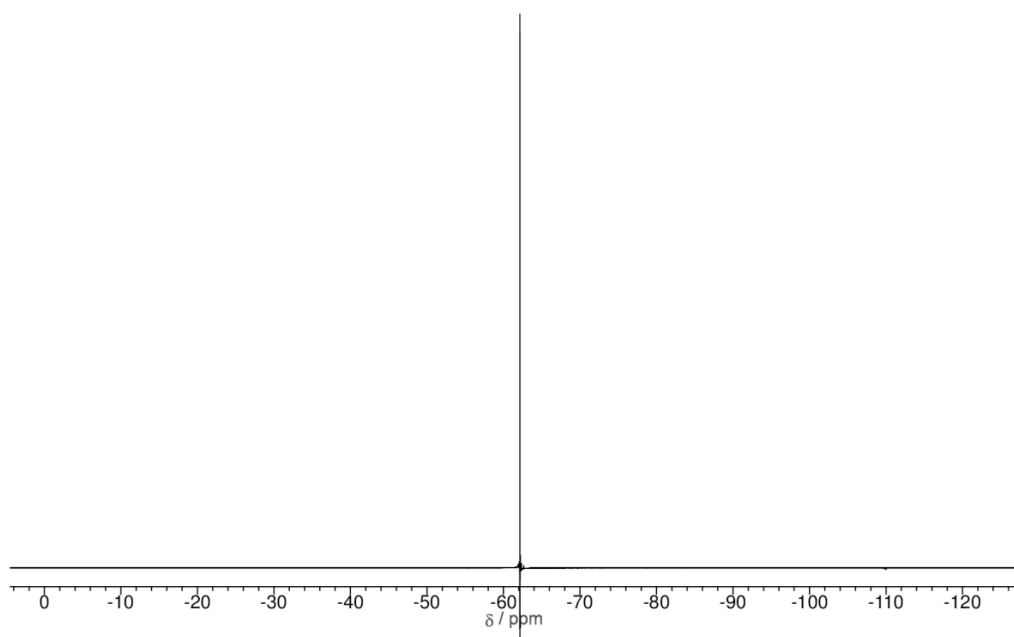

[ $^1\text{H}$  and  $^{13}\text{C}$  NMR Spectra of **3db**]

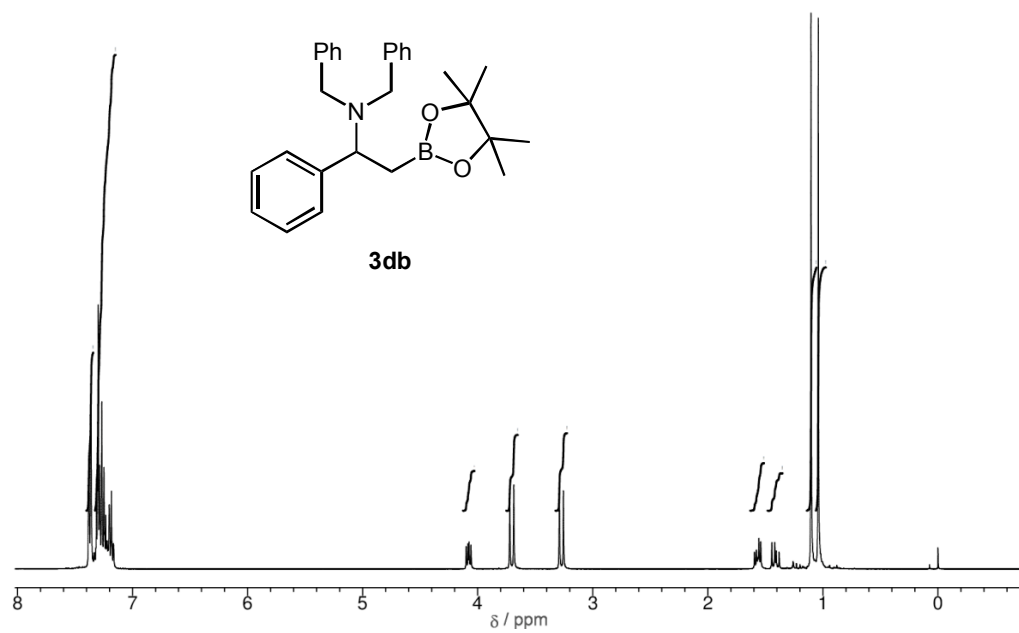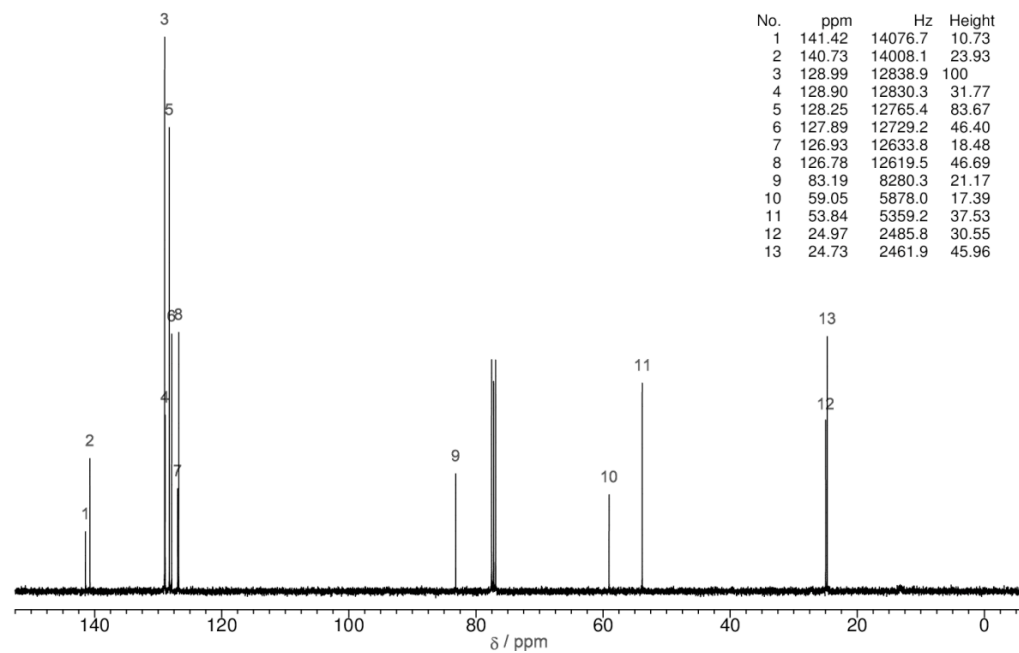

[ $^1\text{H}$  and  $^{13}\text{C}$  NMR Spectra of **3eb**]

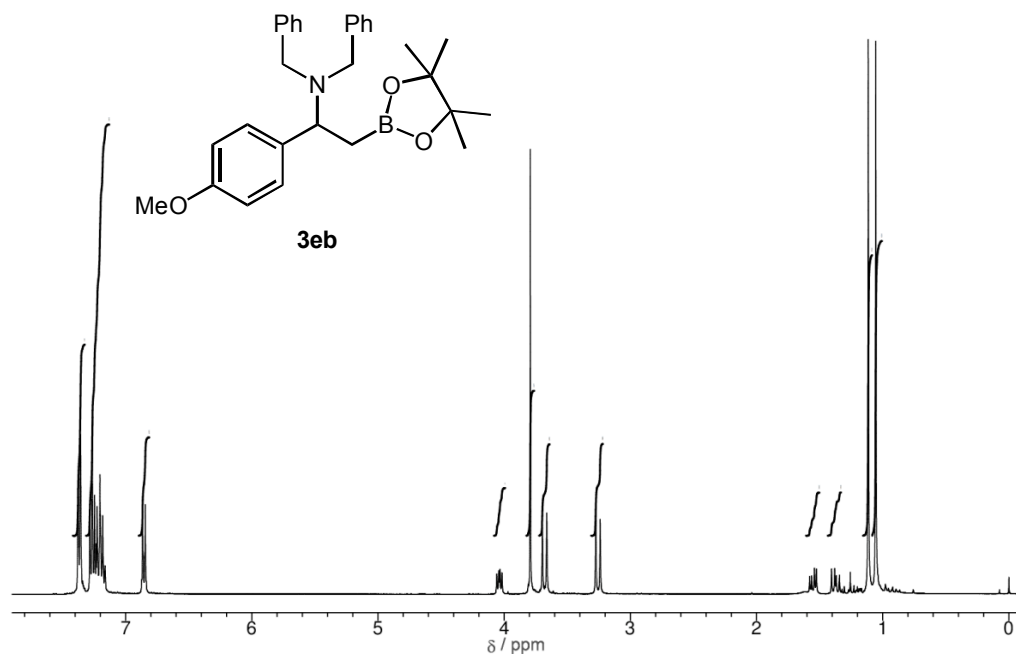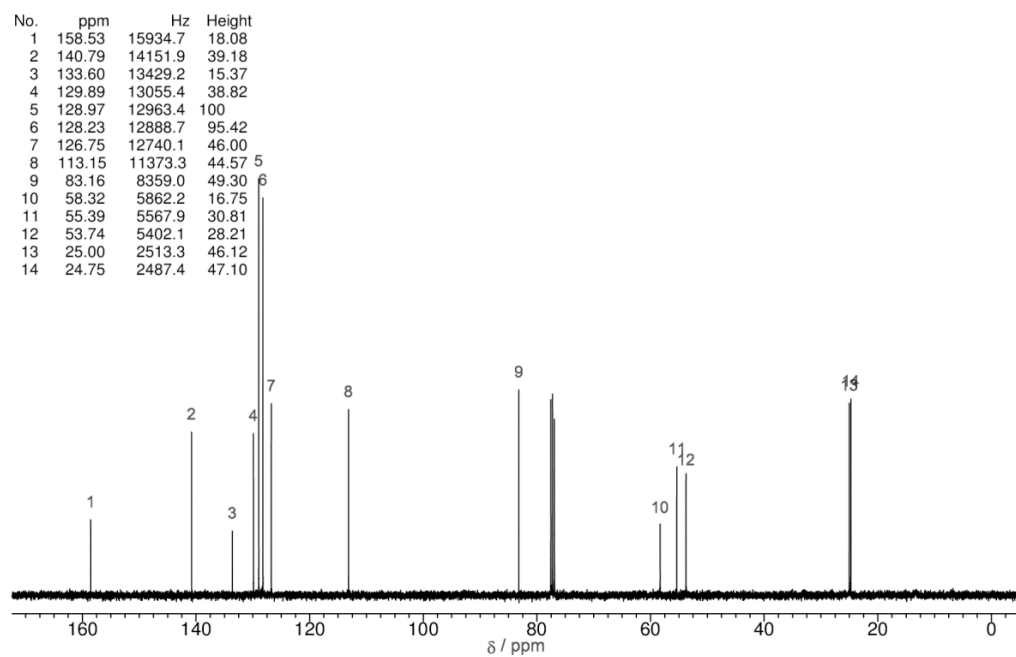

[ $^1\text{H}$ ,  $^{13}\text{C}$ , and  $^{19}\text{F}$  NMR Spectra of **3fb**]

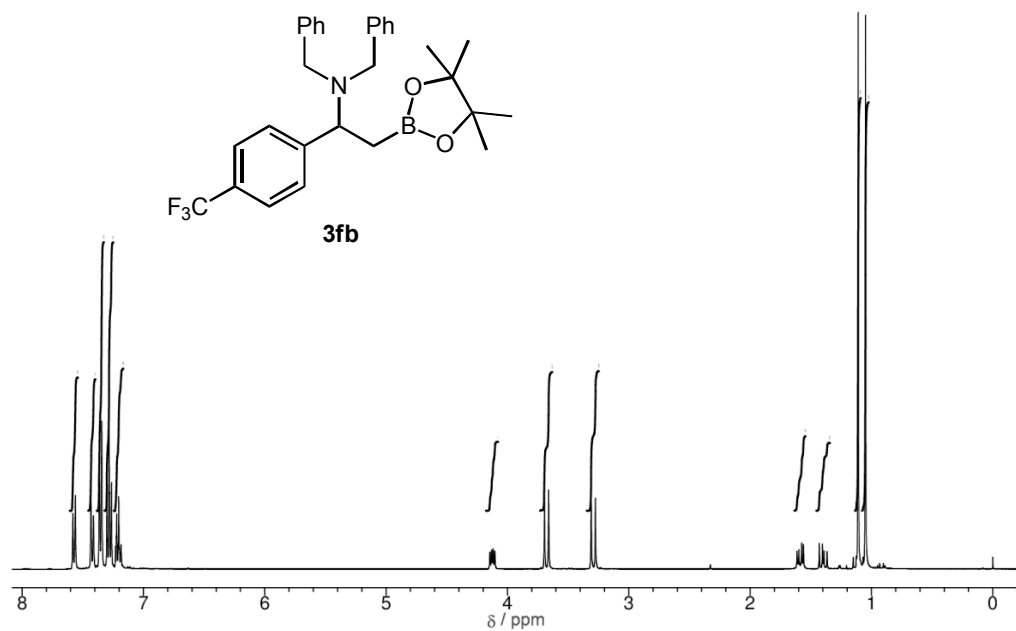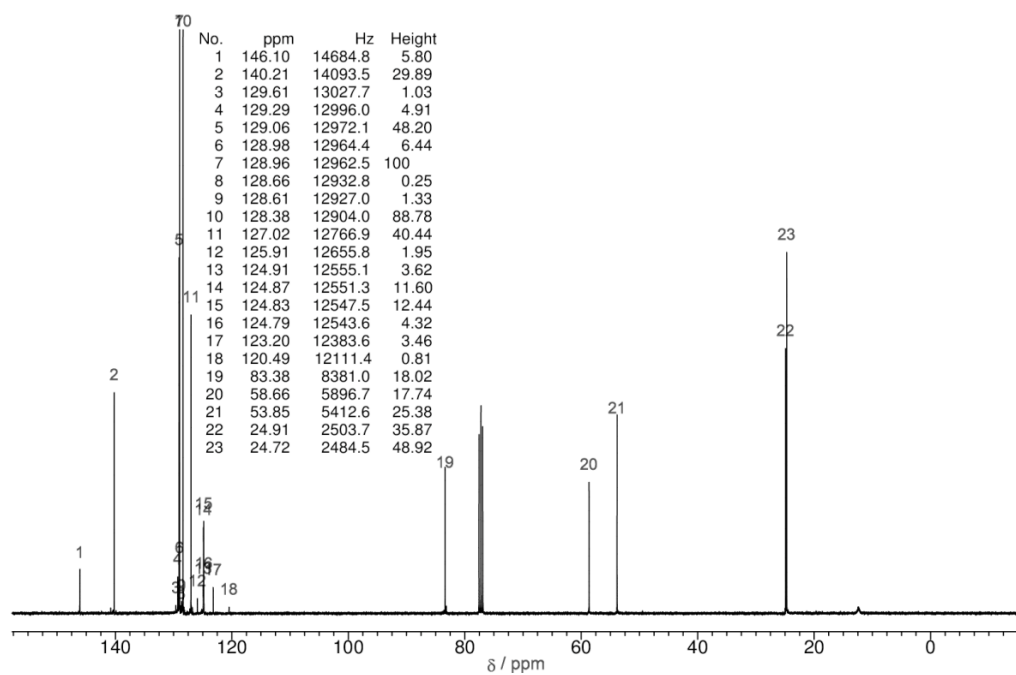

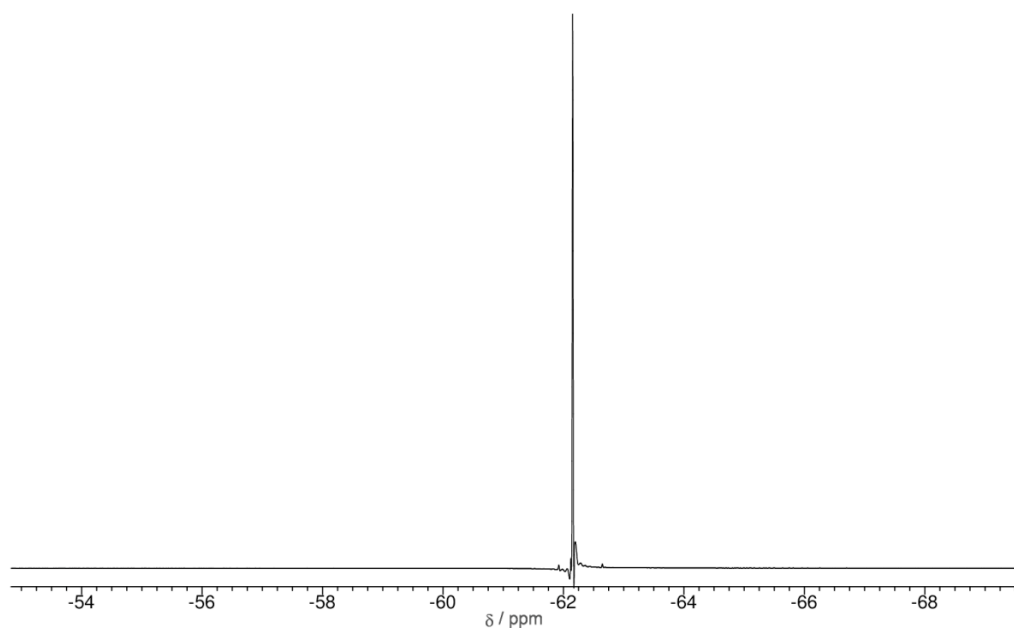

[ $^1\text{H}$  and  $^{13}\text{C}$  NMR Spectra of **3gb**]

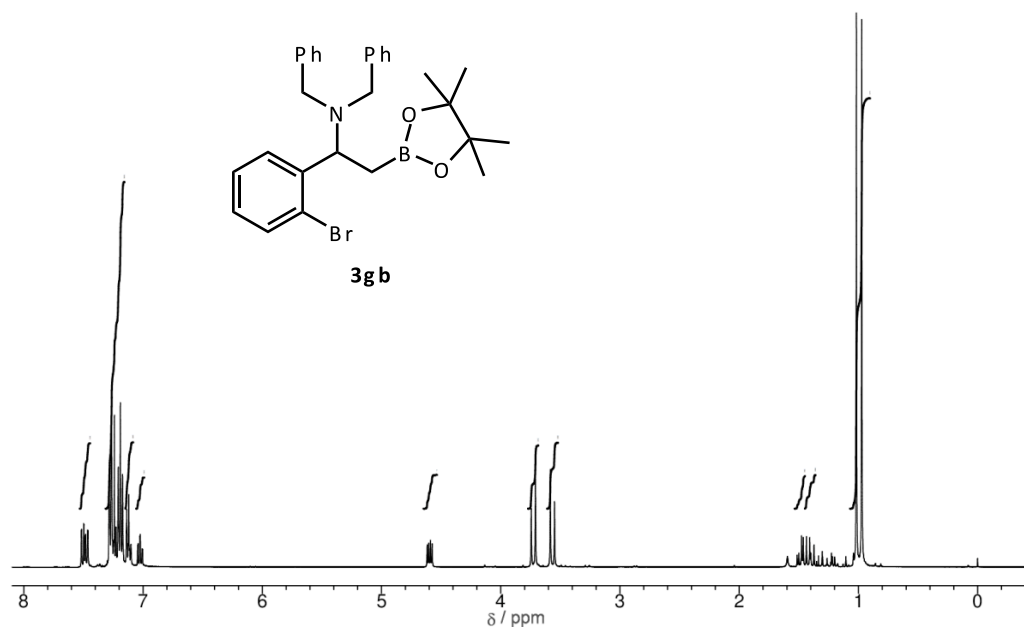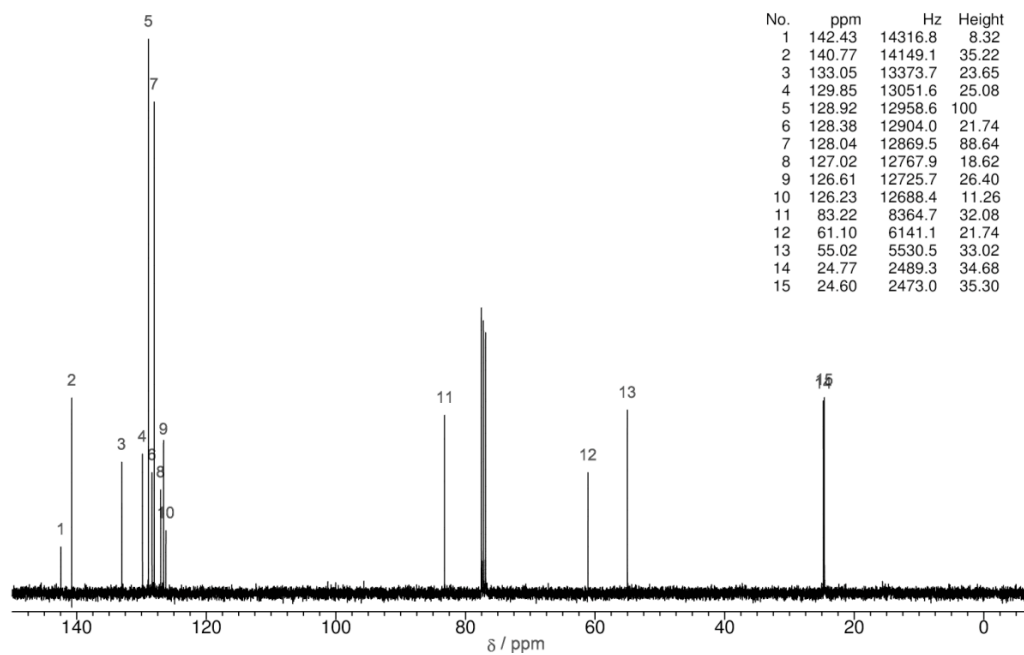

[ $^1\text{H}$  and  $^{13}\text{C}$  NMR Spectra of **3hb**]

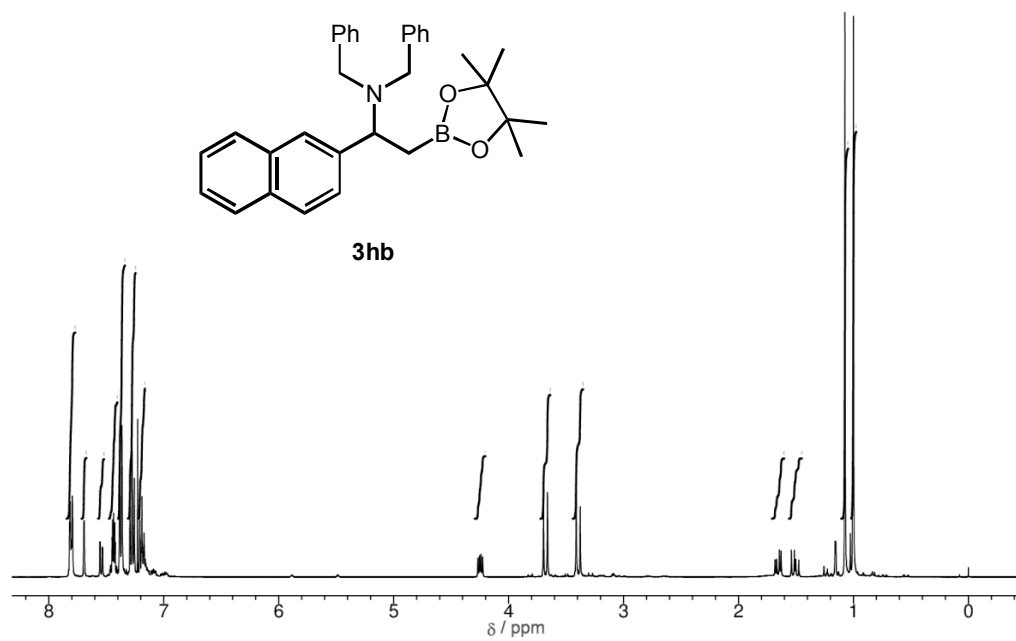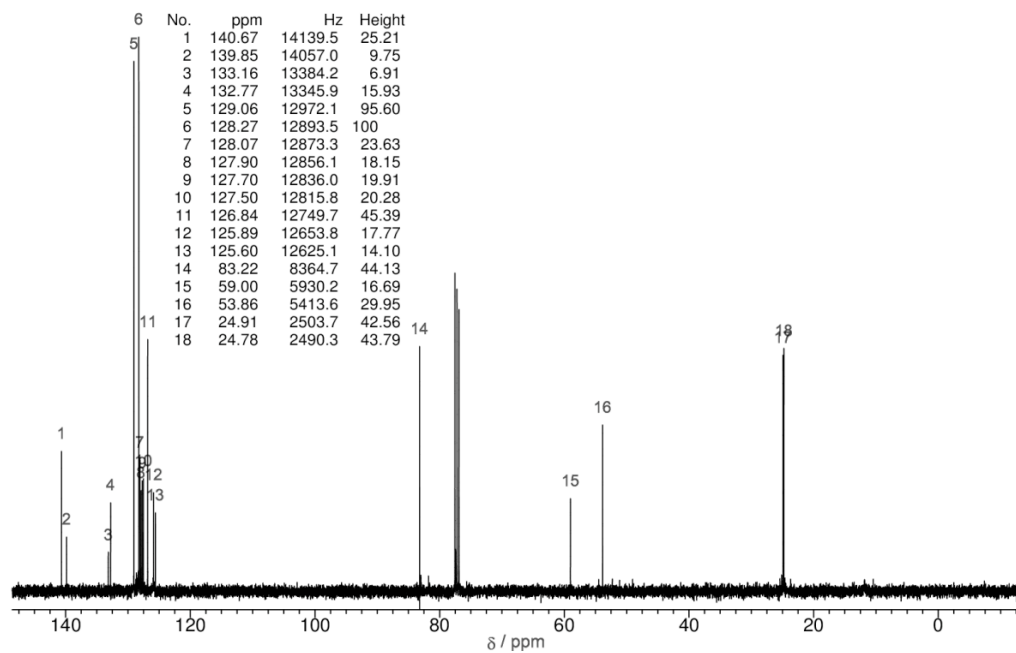

[ $^1\text{H}$  and  $^{13}\text{C}$  NMR Spectra of **3ia**]

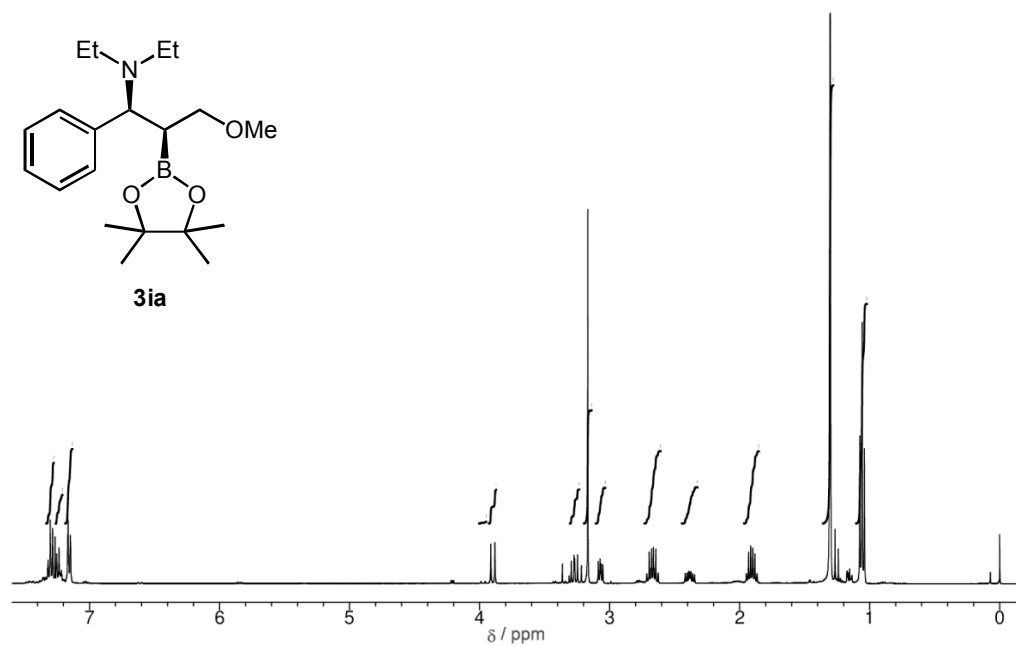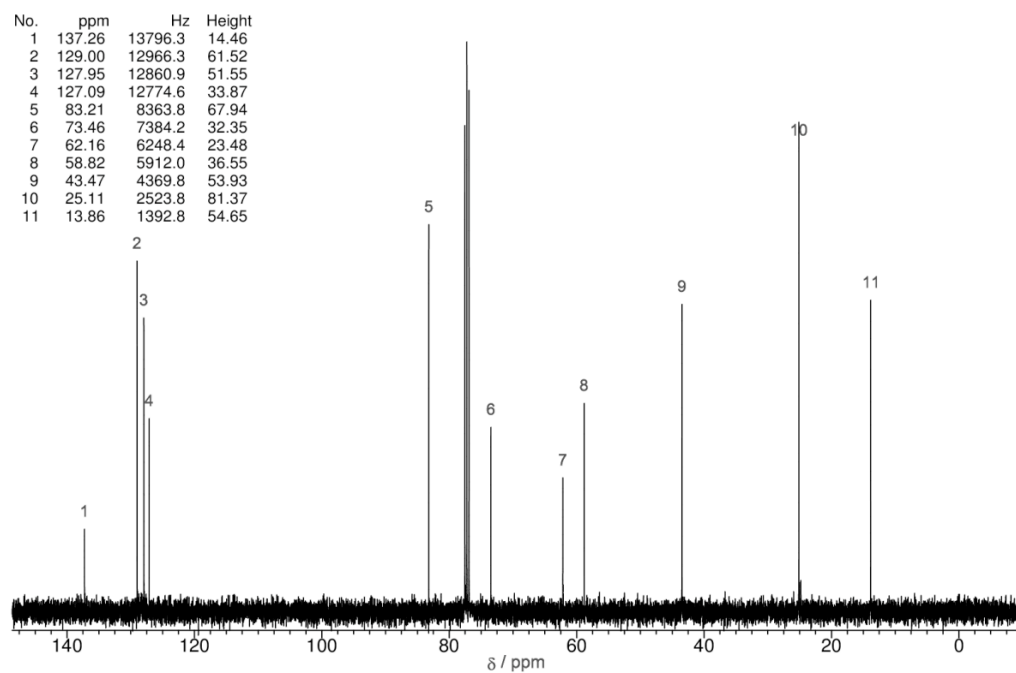

[ $^1\text{H}$  and  $^{13}\text{C}$  NMR Spectra of **3ib**]

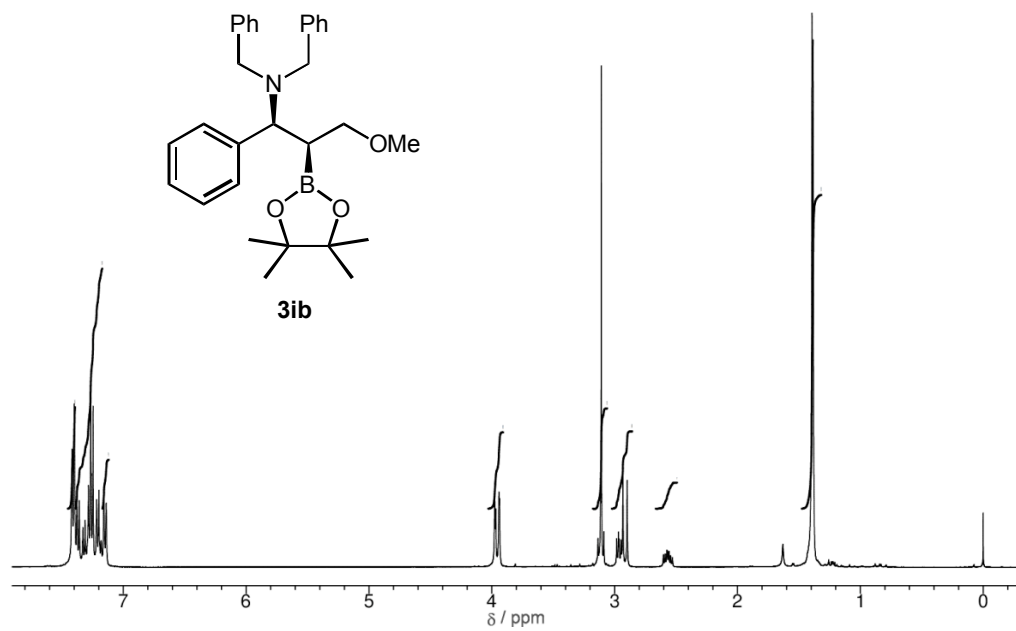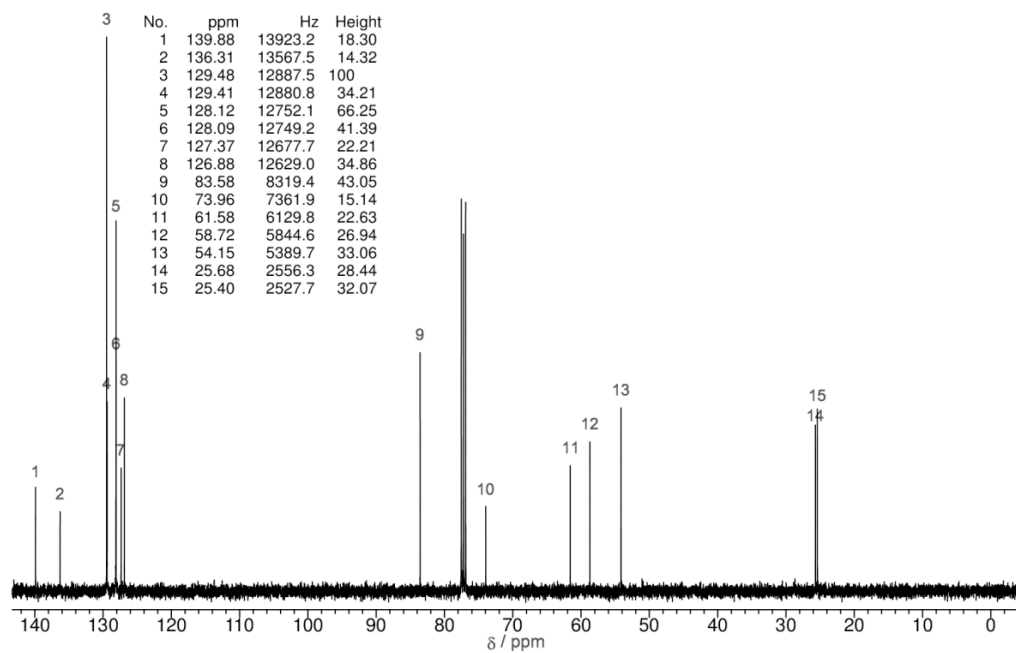

[ $^1\text{H}$  and  $^{13}\text{C}$  NMR Spectra of an 88:12 mixture of **3jb** and **3jb'**]

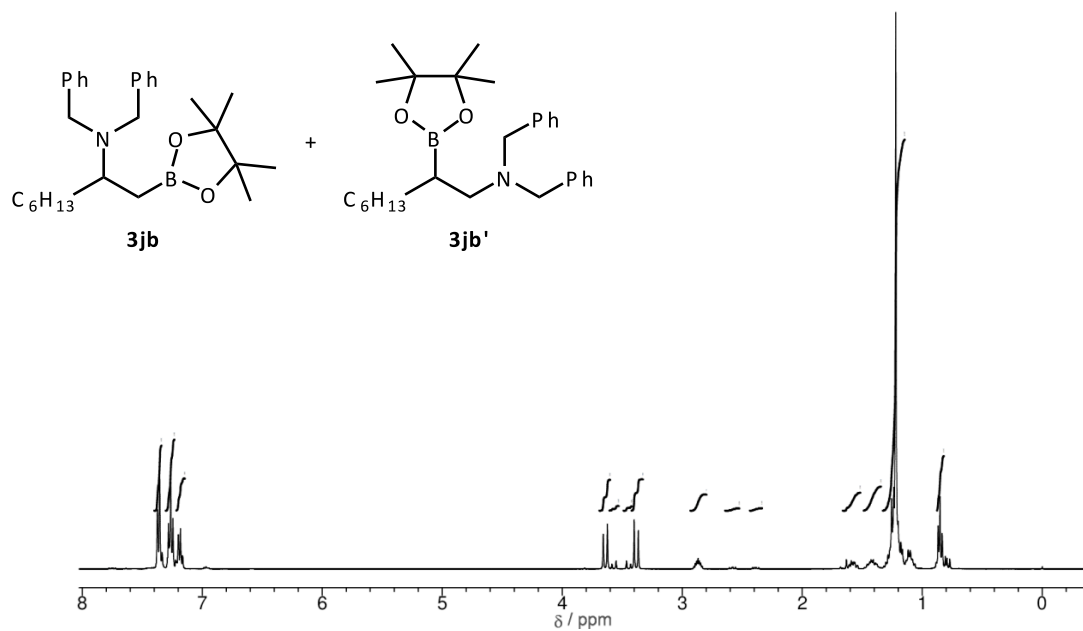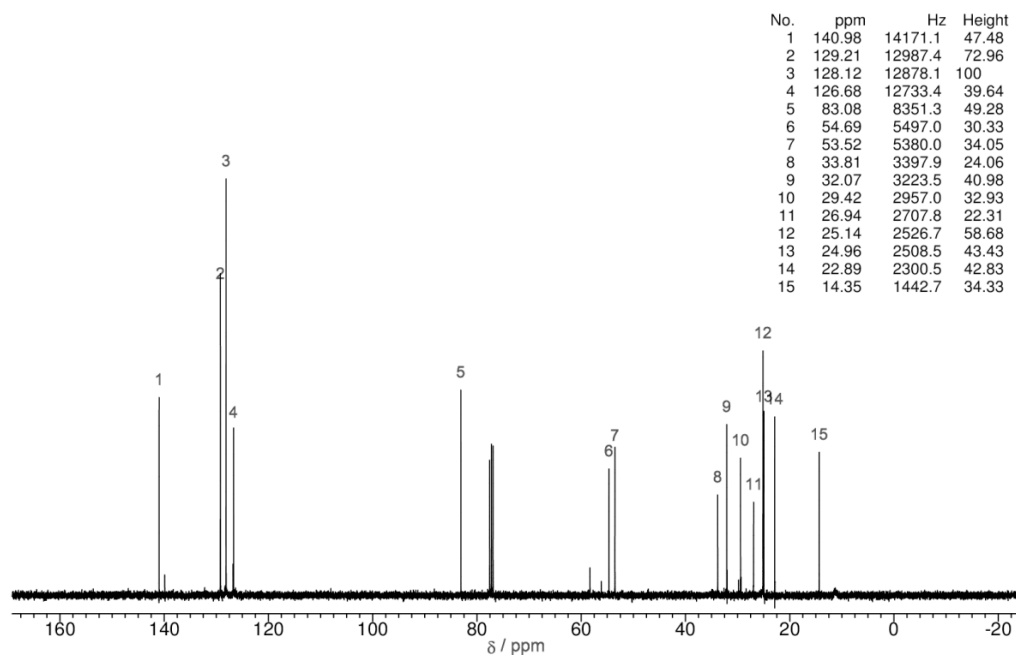

[ $^1\text{H}$  and  $^{13}\text{C}$  NMR Spectra of **3kb**]

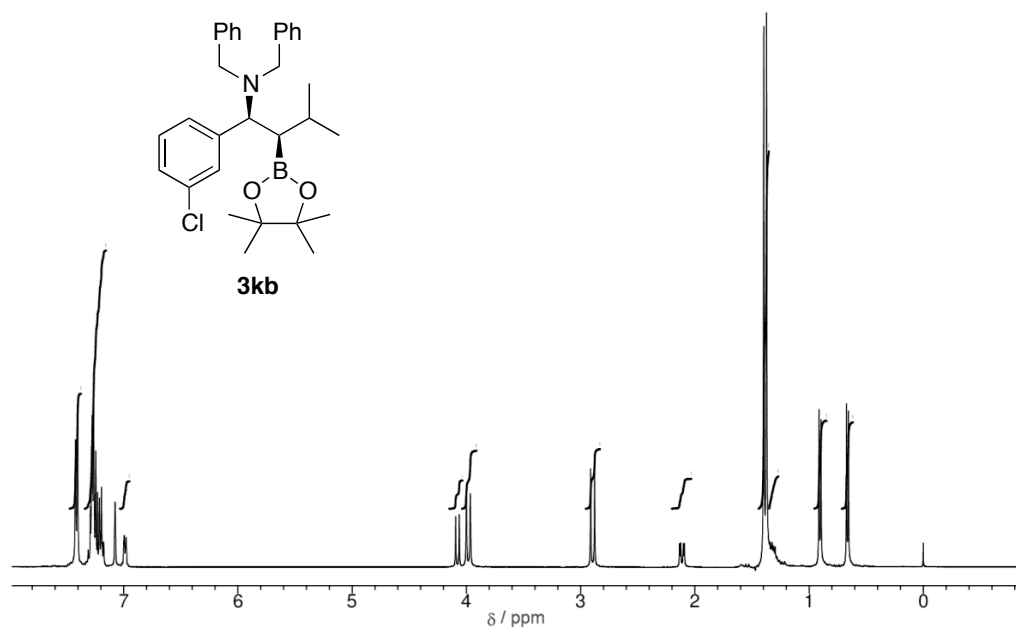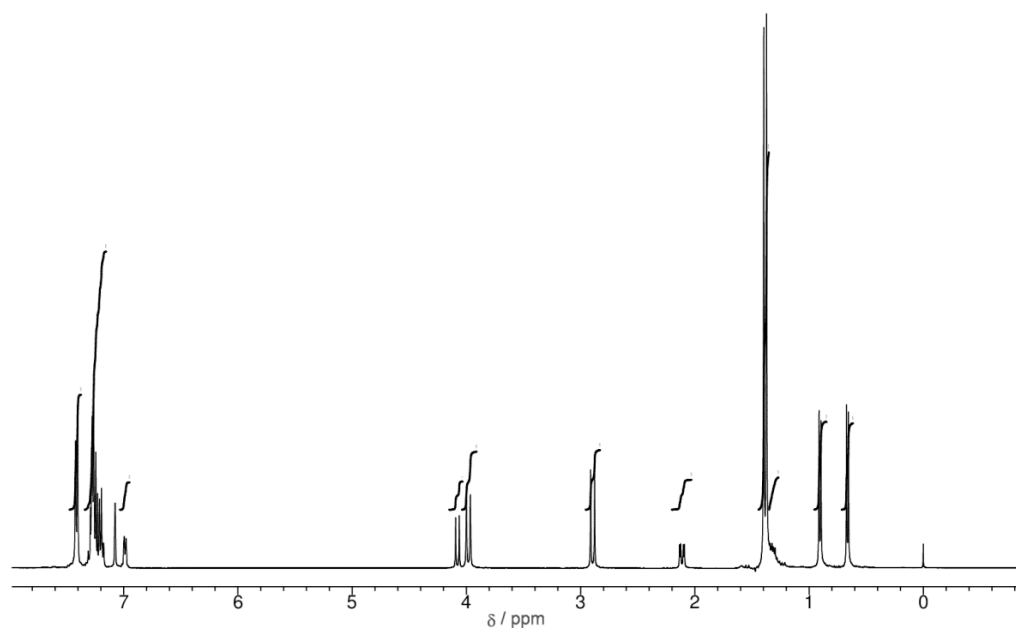

[ $^1\text{H}$  and  $^{13}\text{C}$  NMR Spectra of a 90:10 mixture of **3lb** and **3lb'**]

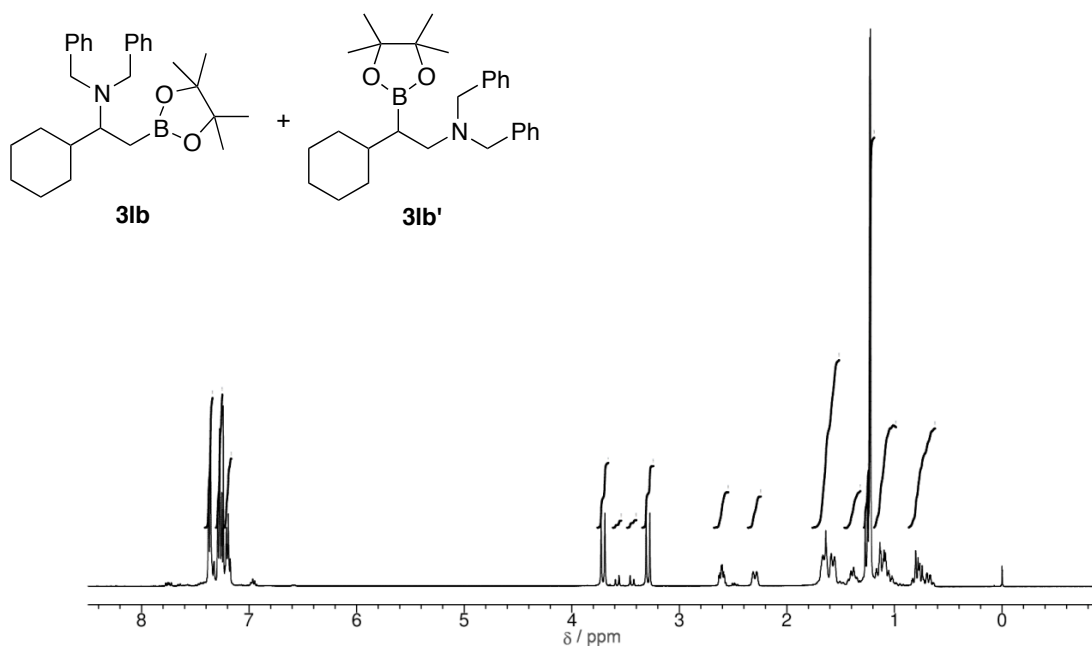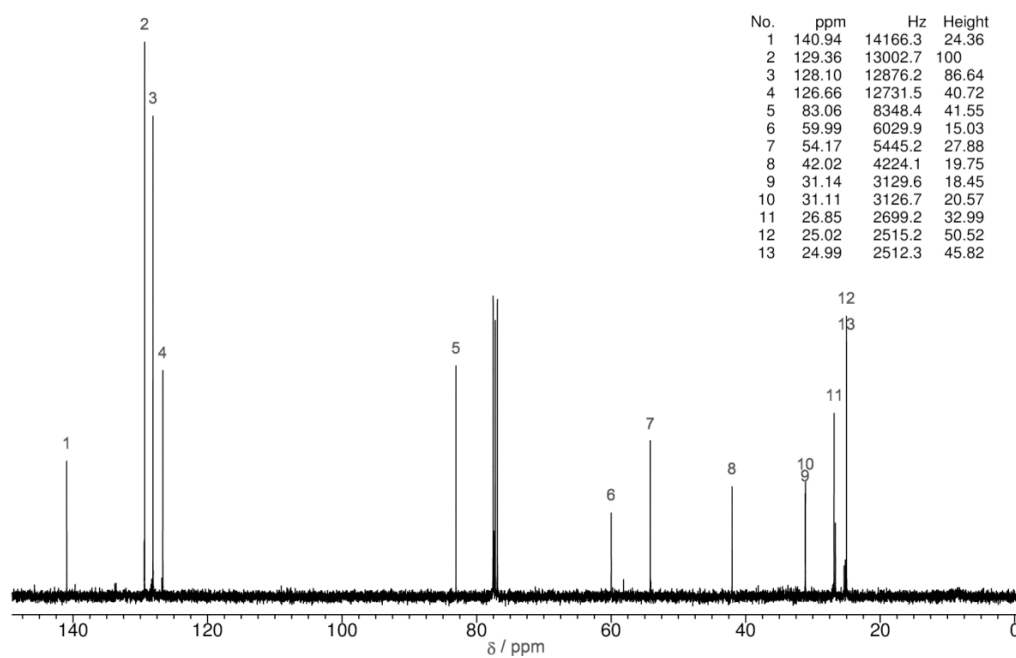

[ $^1\text{H}$ ,  $^{13}\text{C}$ , and  $^{19}\text{F}$  NMR Spectra of **3aa-BF<sub>3</sub>**]

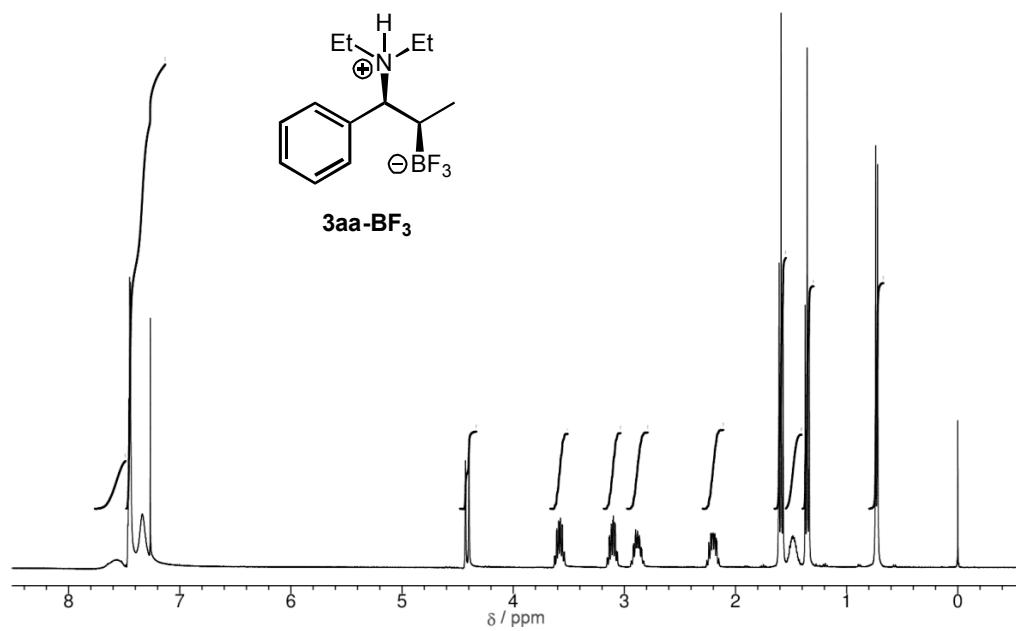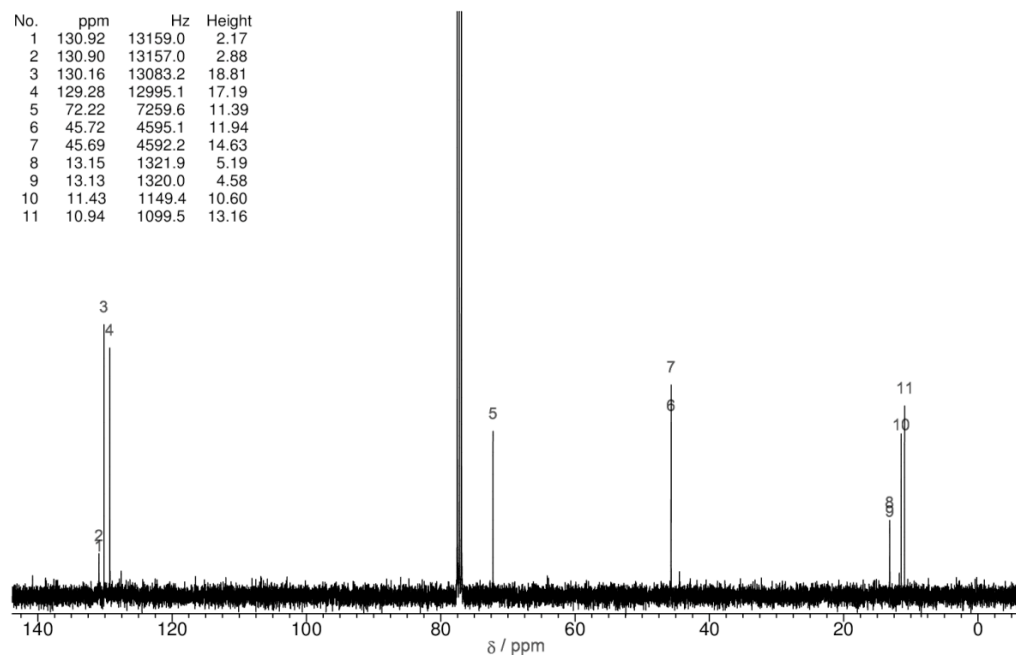

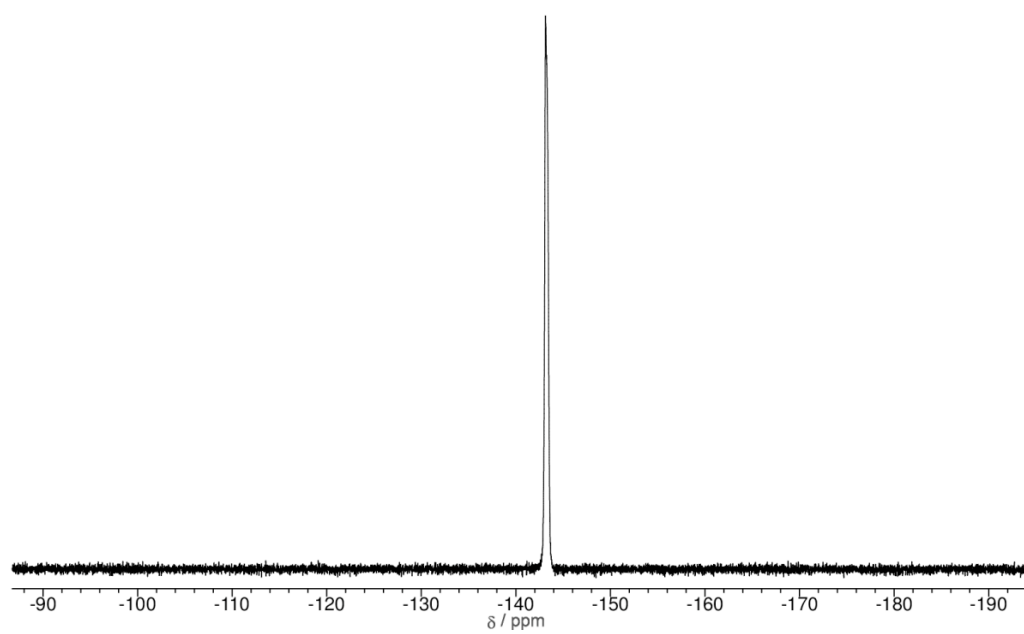

[ $^1\text{H}$ ,  $^{13}\text{C}$ , and  $^{19}\text{F}$  NMR Spectra of **3ac-BF<sub>3</sub>**]

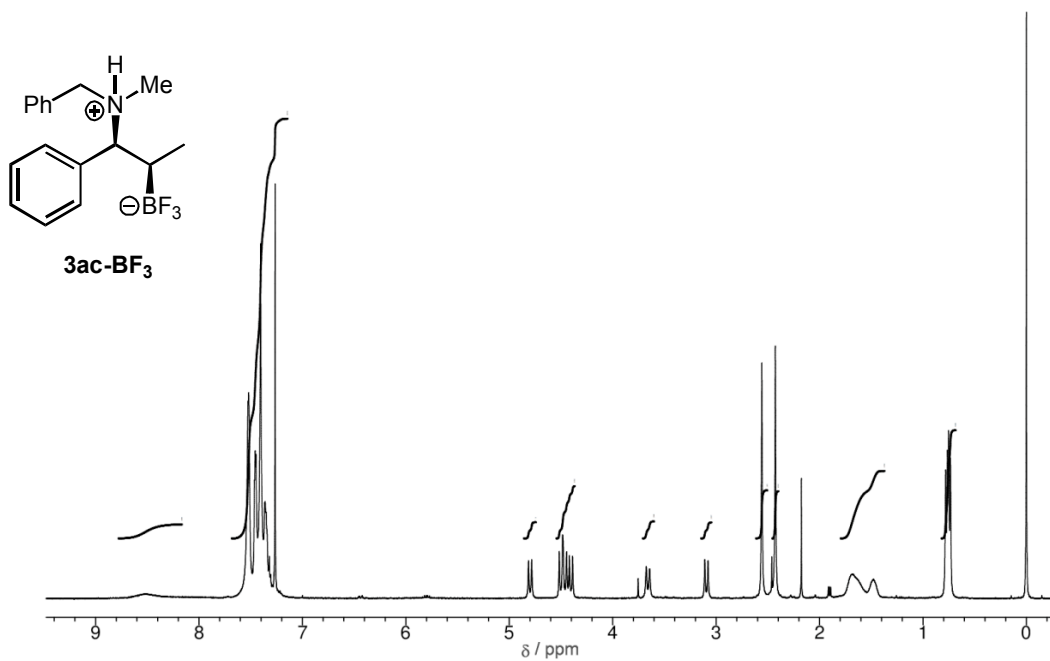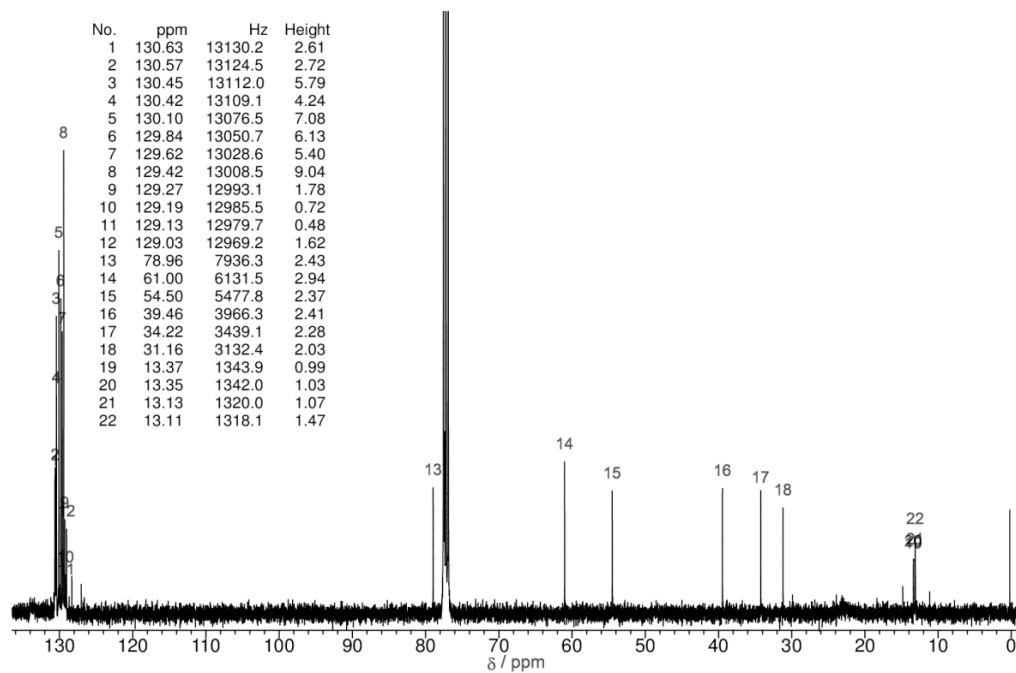

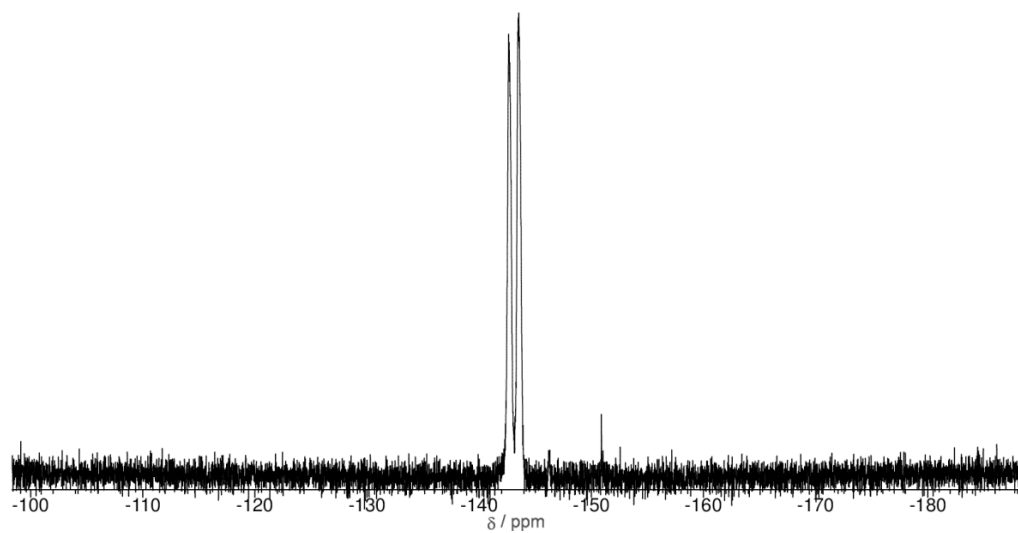

[ $^1\text{H}$ ,  $^{13}\text{C}$ , and  $^{19}\text{F}$  NMR Spectra of **3ae-BF<sub>3</sub>**]

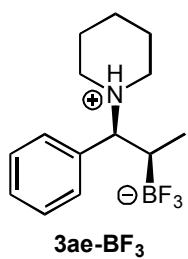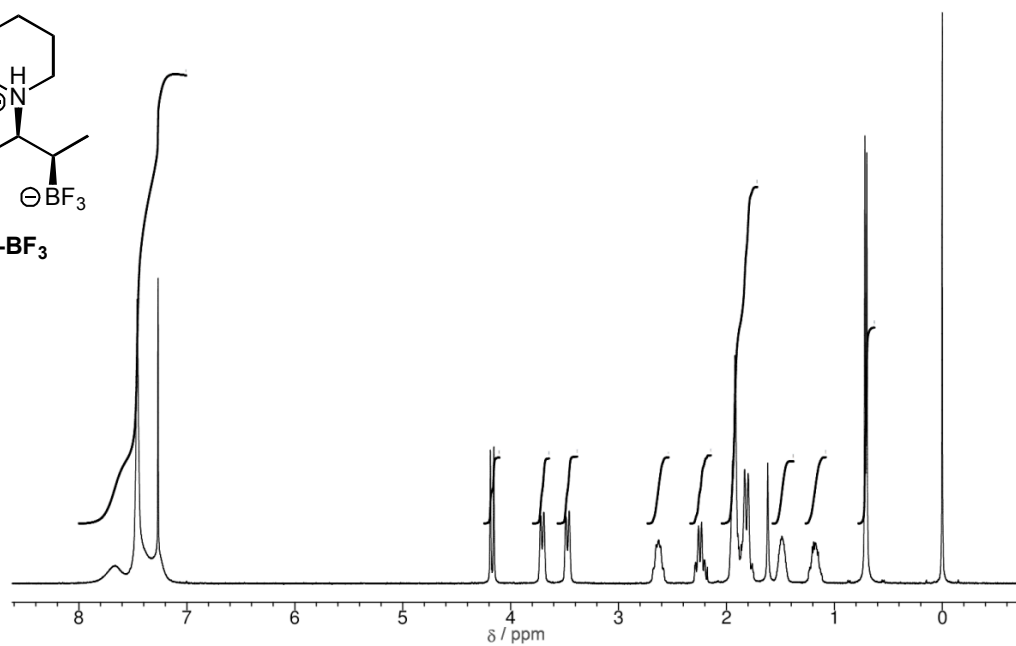

| No. | ppm    | Hz      | Height |
|-----|--------|---------|--------|
| 1   | 131.23 | 13190.6 | 2.42   |
| 2   | 131.21 | 13188.7 | 2.46   |
| 3   | 130.11 | 13078.4 | 12.29  |
| 4   | 129.21 | 12987.4 | 10.73  |
| 5   | 78.03  | 7843.3  | 6.00   |
| 6   | 54.02  | 5429.9  | 11.20  |
| 7   | 48.35  | 4859.6  | 9.10   |
| 8   | 24.76  | 2488.4  | 9.01   |
| 9   | 24.13  | 2425.1  | 10.21  |
| 10  | 22.18  | 2229.6  | 14.01  |
| 11  | 13.16  | 1322.9  | 5.24   |
| 12  | 13.14  | 1320.9  | 4.58   |

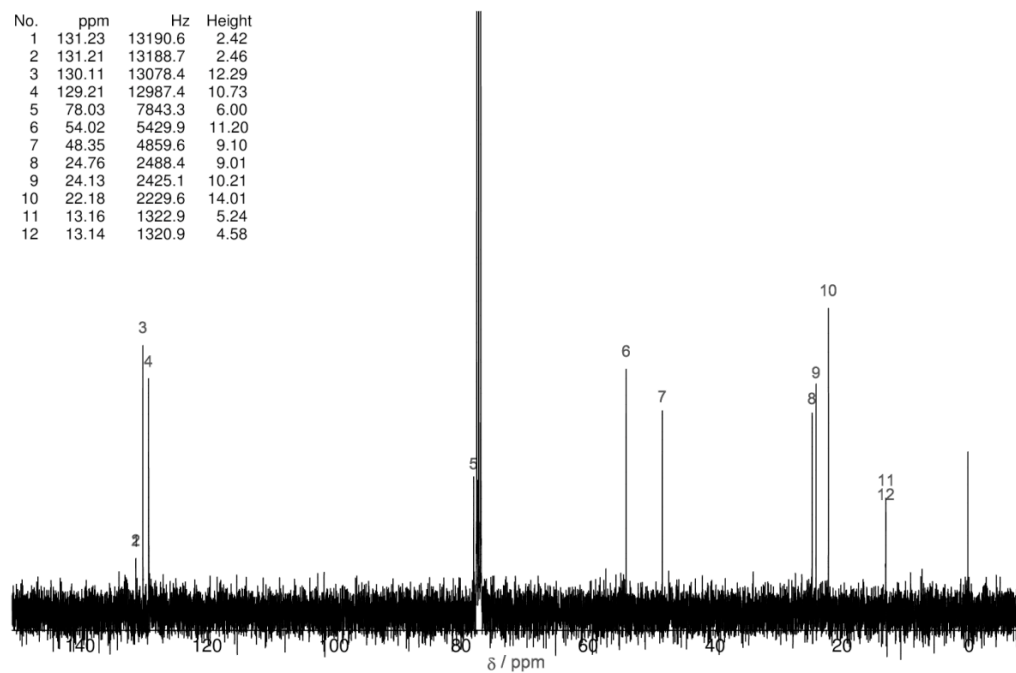

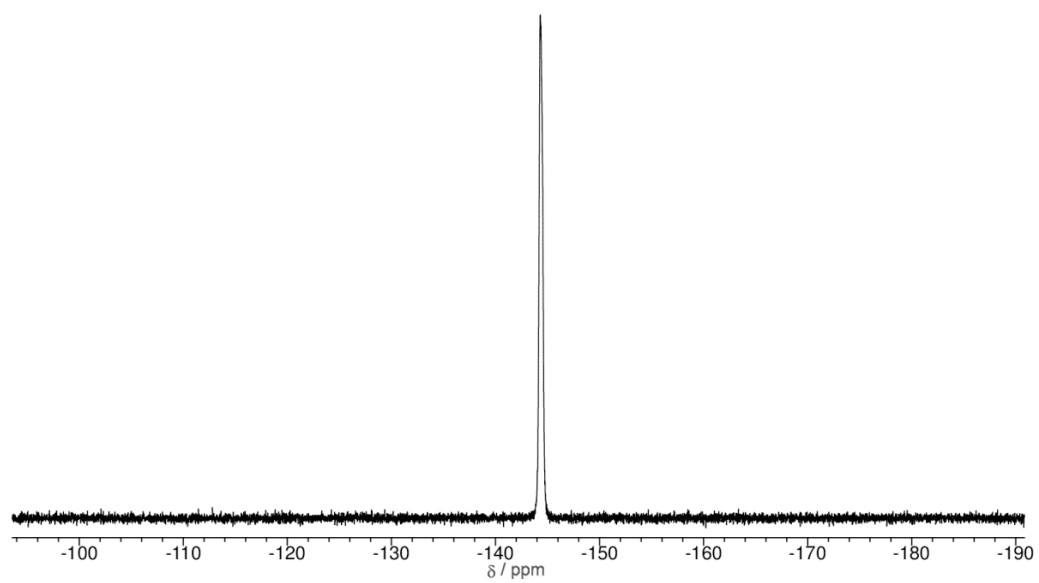

[<sup>1</sup>H, <sup>13</sup>C, and <sup>19</sup>F NMR Spectra of **3af-BF<sub>3</sub>**]

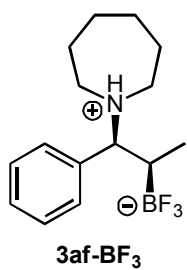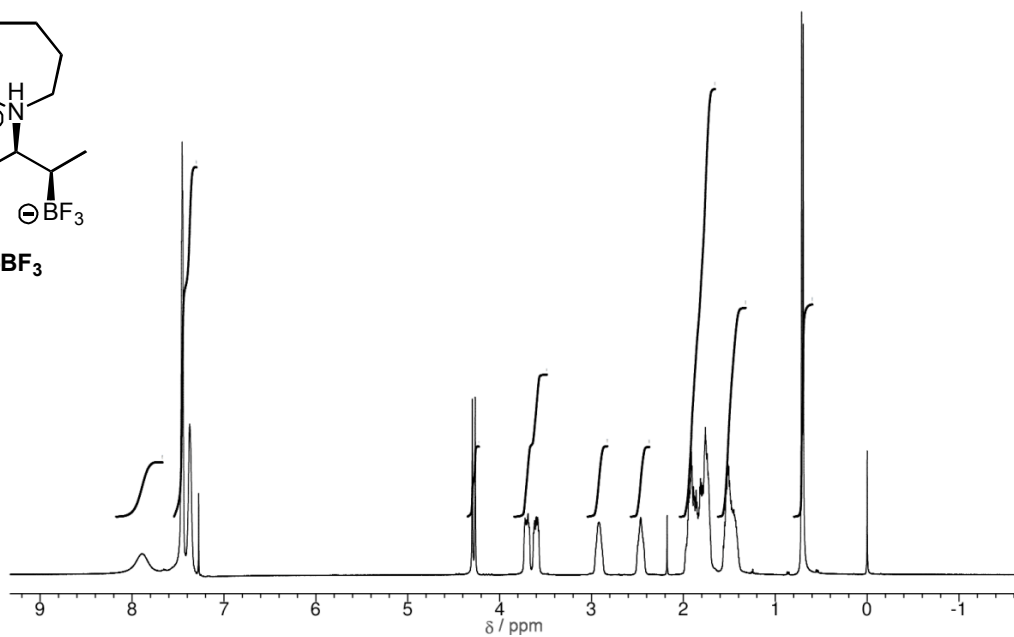

| No. | ppm    | Hz      | Height |
|-----|--------|---------|--------|
| 1   | 131.31 | 13198.3 | 6.94   |
| 2   | 131.29 | 13196.3 | 7.98   |
| 3   | 130.06 | 13072.7 | 33.89  |
| 4   | 129.16 | 12982.6 | 48.13  |
| 5   | 79.10  | 7950.7  | 28.71  |
| 6   | 56.89  | 5718.4  | 31.13  |
| 7   | 49.41  | 4966.9  | 29.90  |
| 8   | 25.60  | 2573.7  | 32.25  |
| 9   | 25.51  | 2564.1  | 36.48  |
| 10  | 25.19  | 2531.5  | 30.99  |
| 11  | 24.91  | 2503.7  | 27.77  |
| 12  | 13.04  | 1310.4  | 12.28  |
| 13  | 13.02  | 1308.5  | 11.94  |

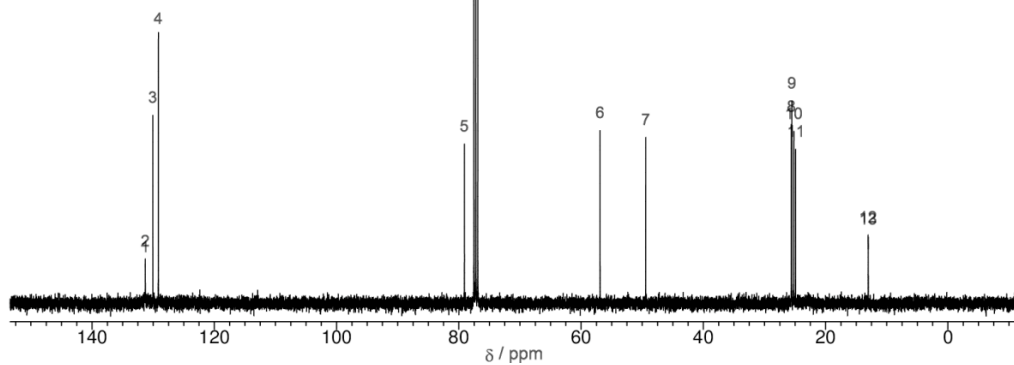

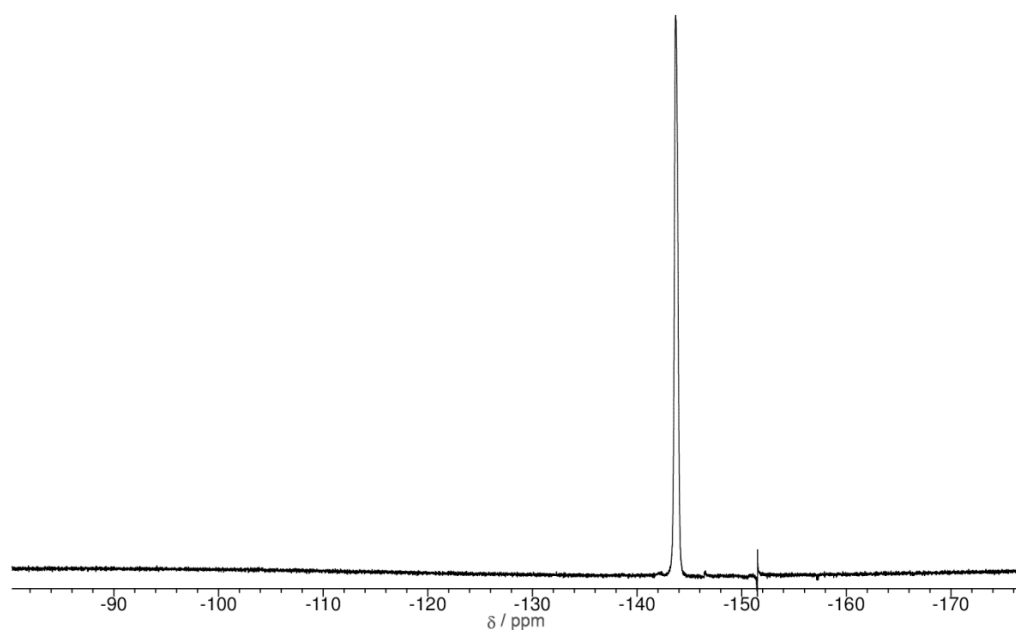

[ $^1\text{H}$ ,  $^{13}\text{C}$ , and  $^{19}\text{F}$  NMR Spectra of **3ia-BF<sub>3</sub>**]

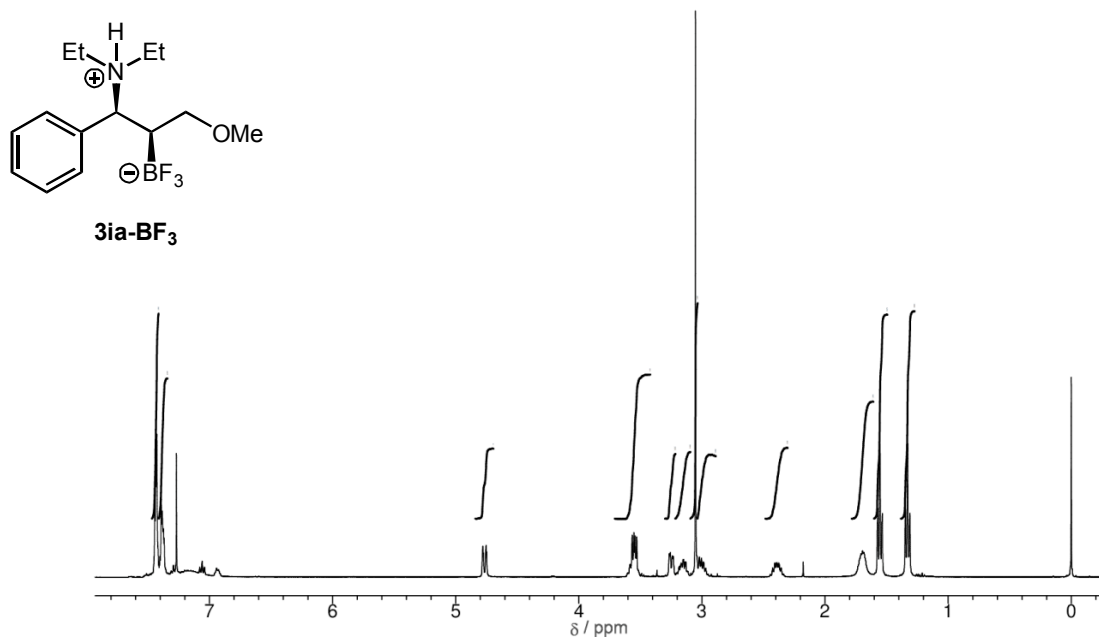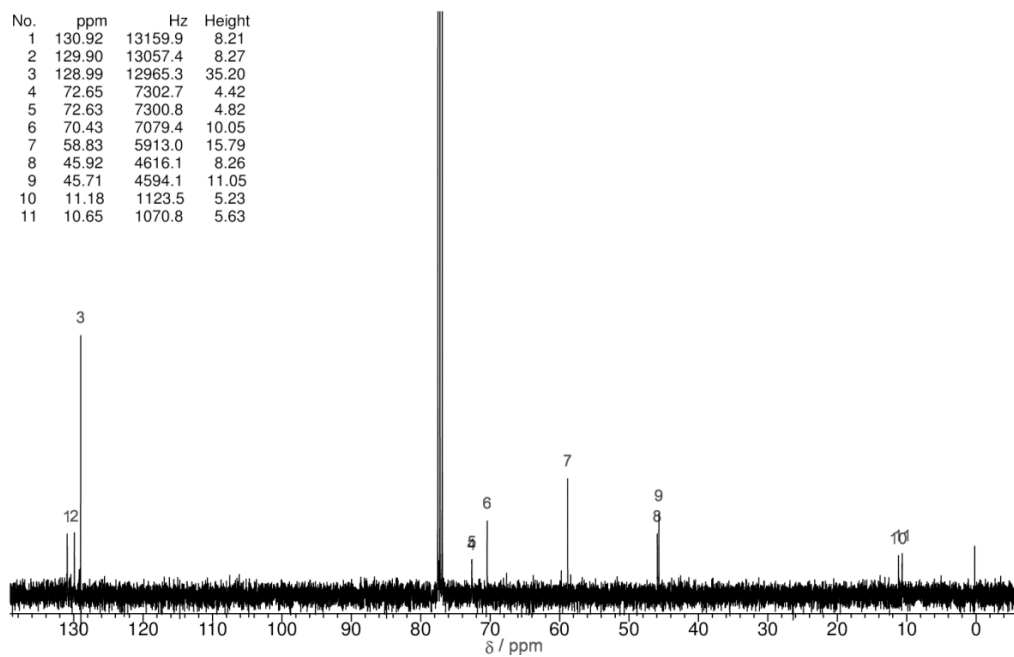

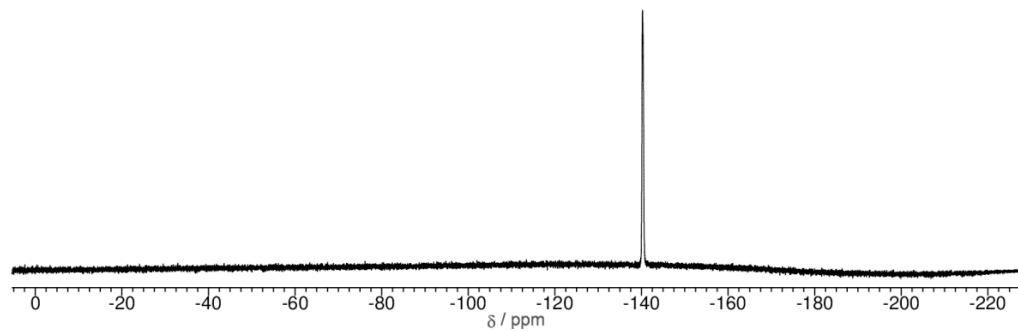

[ $^1\text{H}$  and  $^{13}\text{C}$  NMR Spectra of **4aa**]

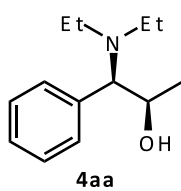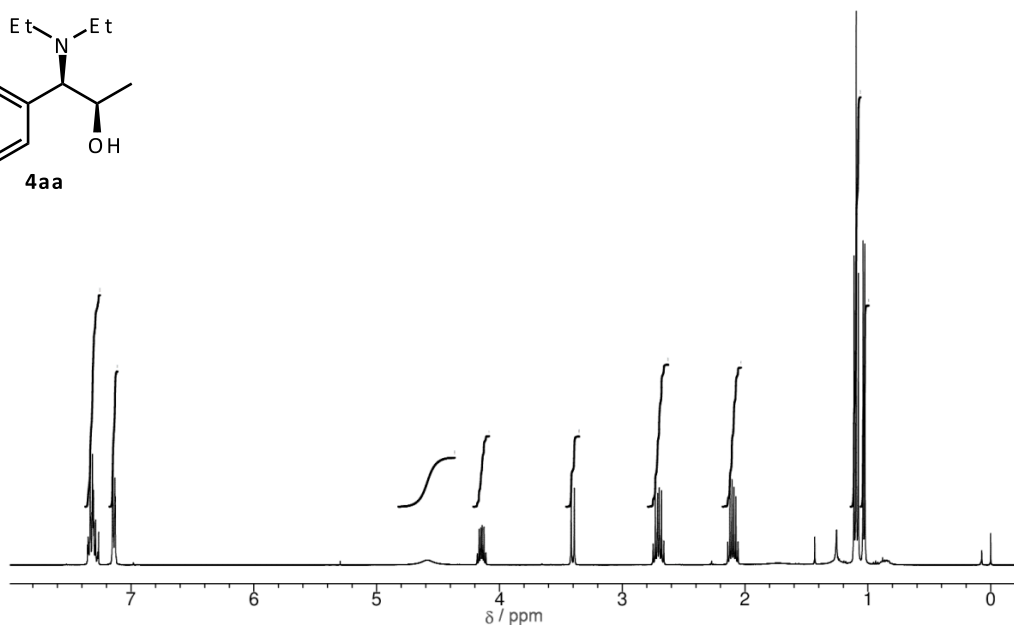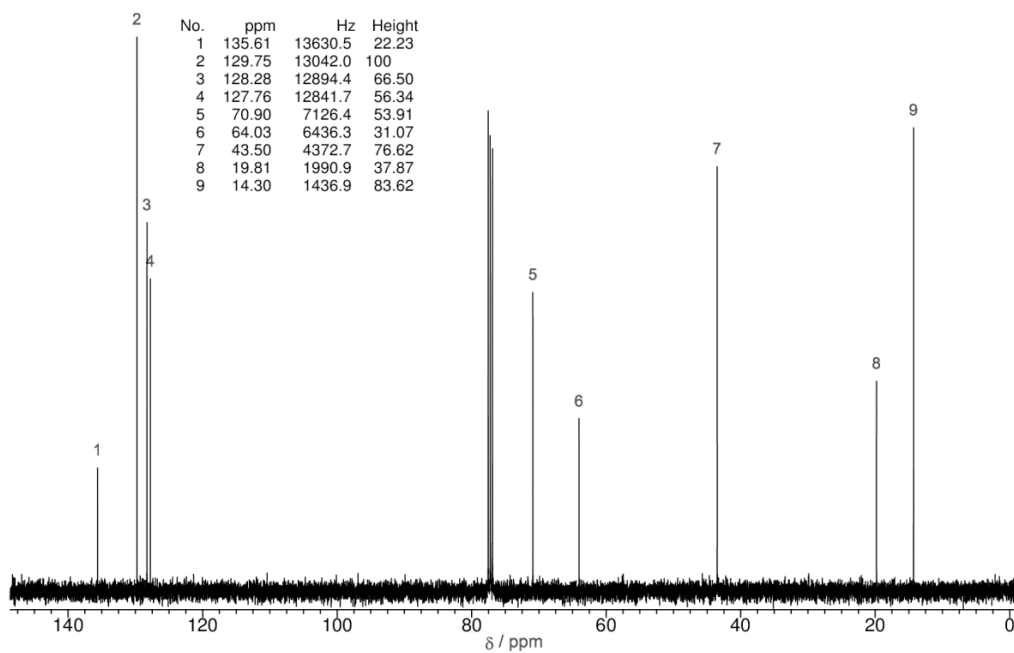

[ $^1\text{H}$  and  $^{13}\text{C}$  NMR Spectra of *syn-4ab*]

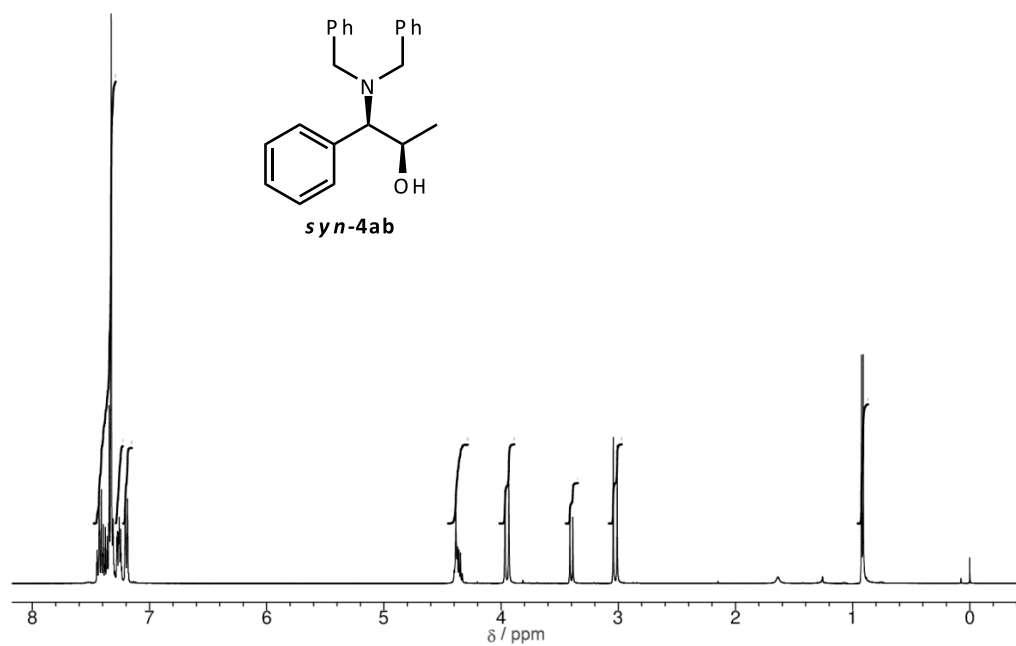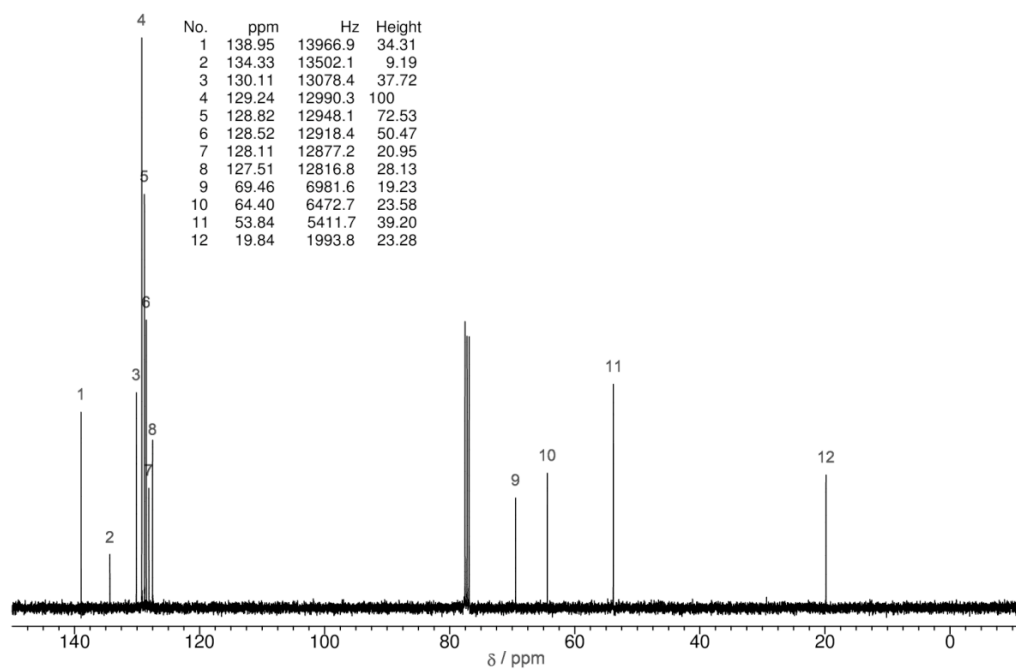

[ $^1\text{H}$  and  $^{13}\text{C}$  NMR Spectra of *anti*-4ab]

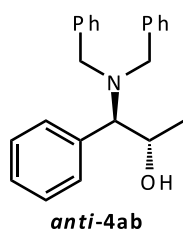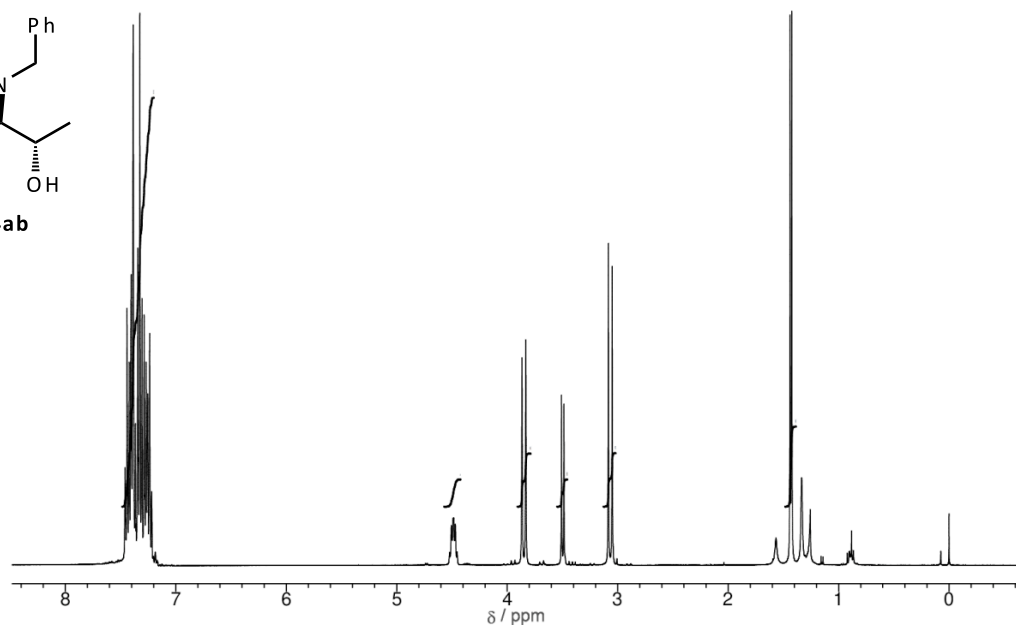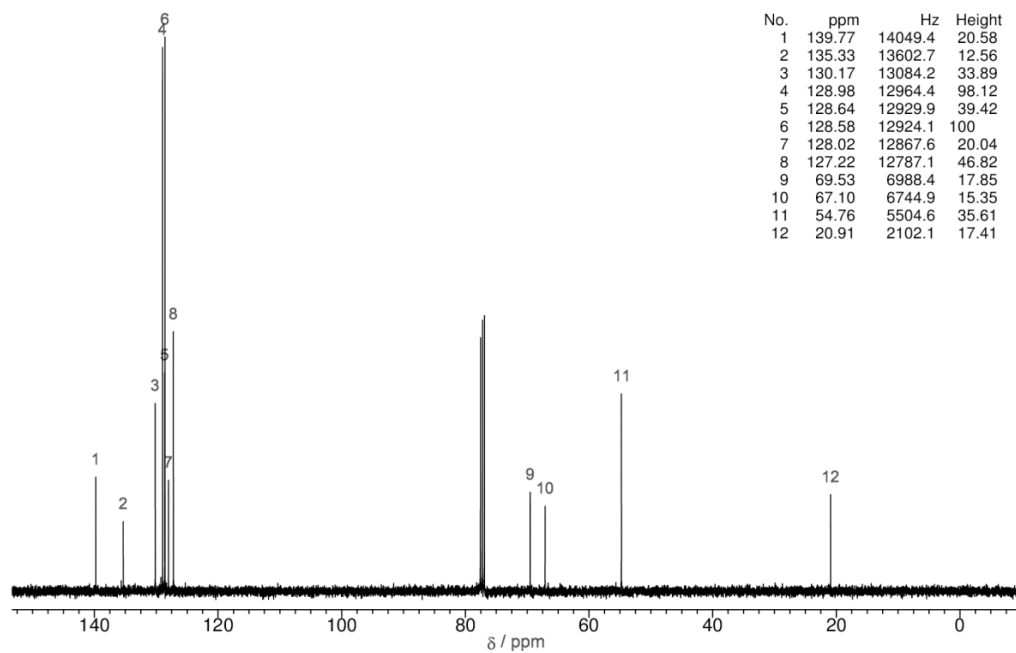

[ $^1\text{H}$  and  $^{13}\text{C}$  NMR Spectra of **4bb**]

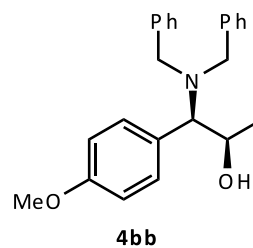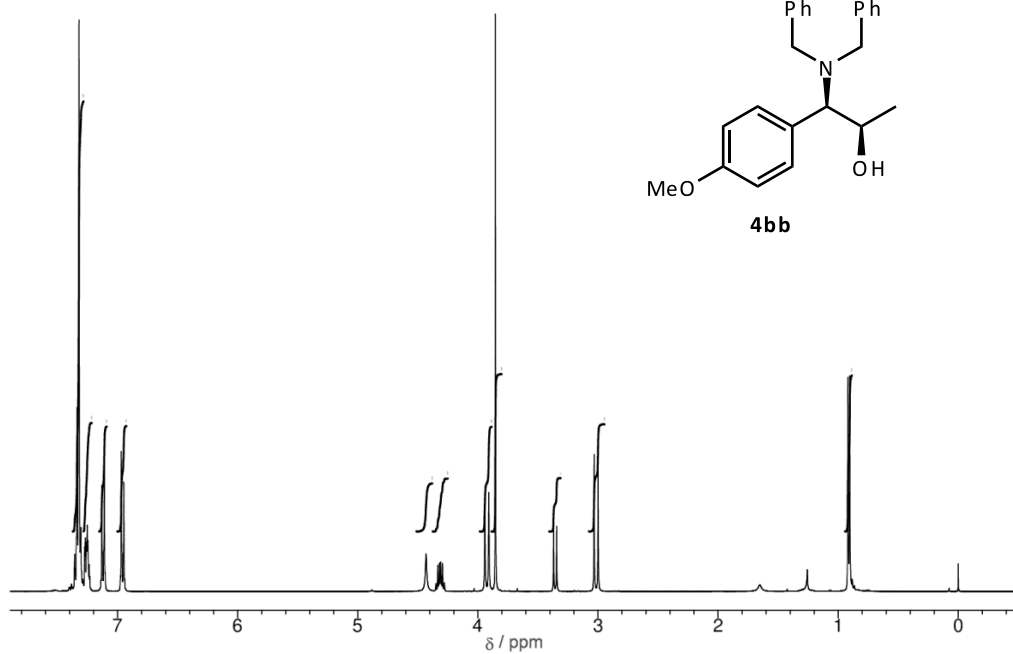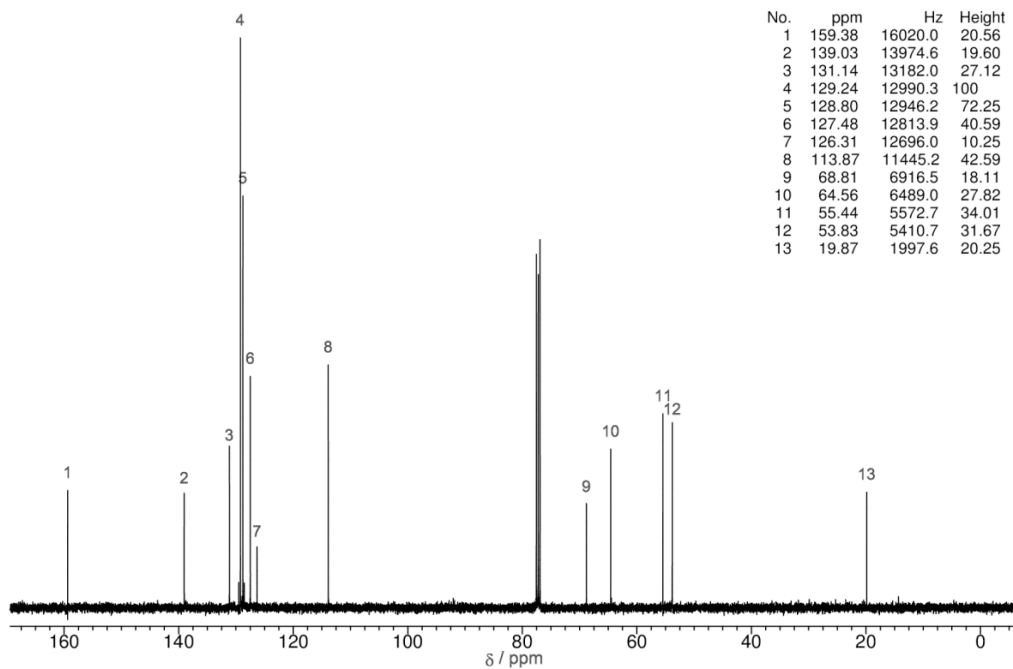

[ $^1\text{H}$  and  $^{13}\text{C}$  NMR Spectra of **4me**]

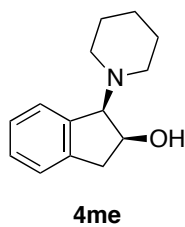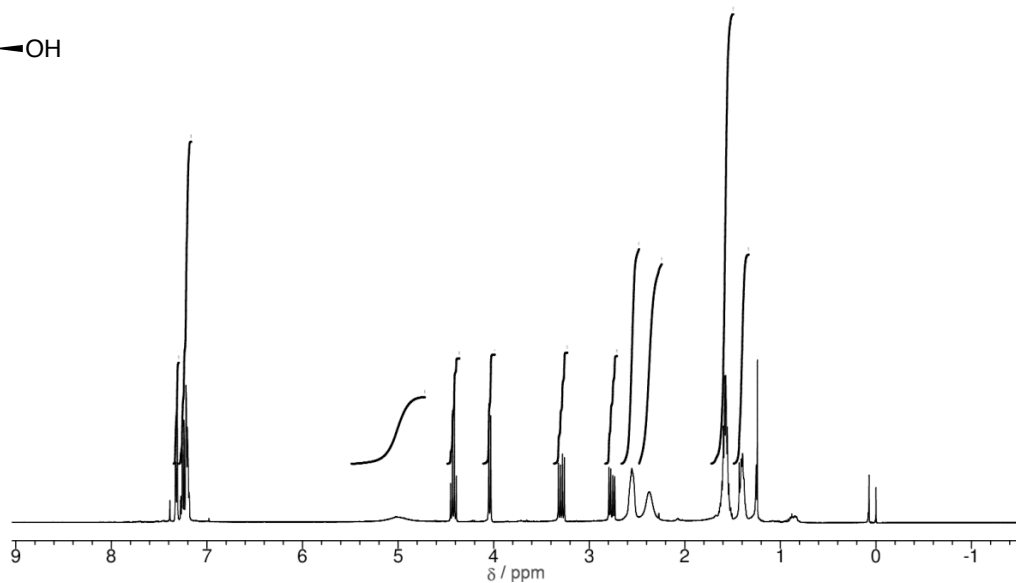

| No. | ppm    | Hz      | Height |
|-----|--------|---------|--------|
| 1   | 141.90 | 14263.1 | 31.54  |
| 2   | 139.16 | 13988.0 | 24.87  |
| 3   | 128.60 | 12926.1 | 57.51  |
| 4   | 126.59 | 12723.8 | 28.63  |
| 5   | 126.57 | 12721.9 | 68.15  |
| 6   | 125.68 | 12632.8 | 67.30  |
| 7   | 70.97  | 7133.1  | 38.56  |
| 8   | 69.16  | 6951.9  | 63.26  |
| 9   | 52.81  | 5308.2  | 5.57   |
| 10  | 41.99  | 4220.3  | 59.96  |
| 11  | 26.82  | 2695.4  | 44.54  |
| 12  | 24.29  | 2441.4  | 58.04  |

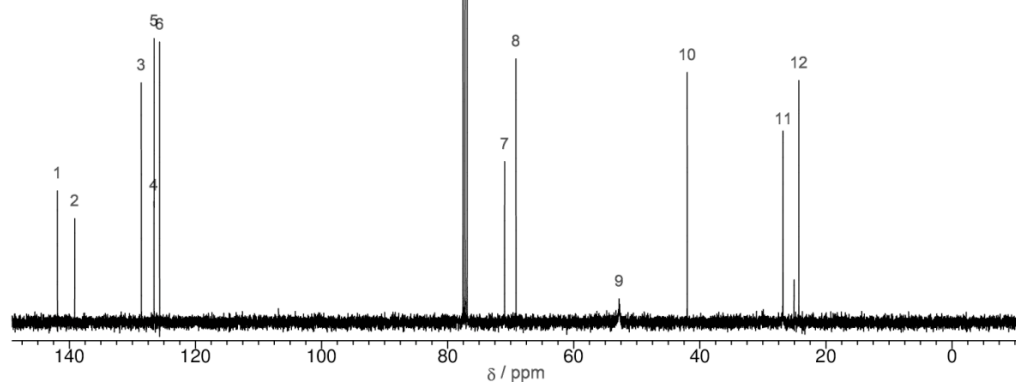

[<sup>1</sup>H and <sup>13</sup>C NMR Spectra of **5aa**]

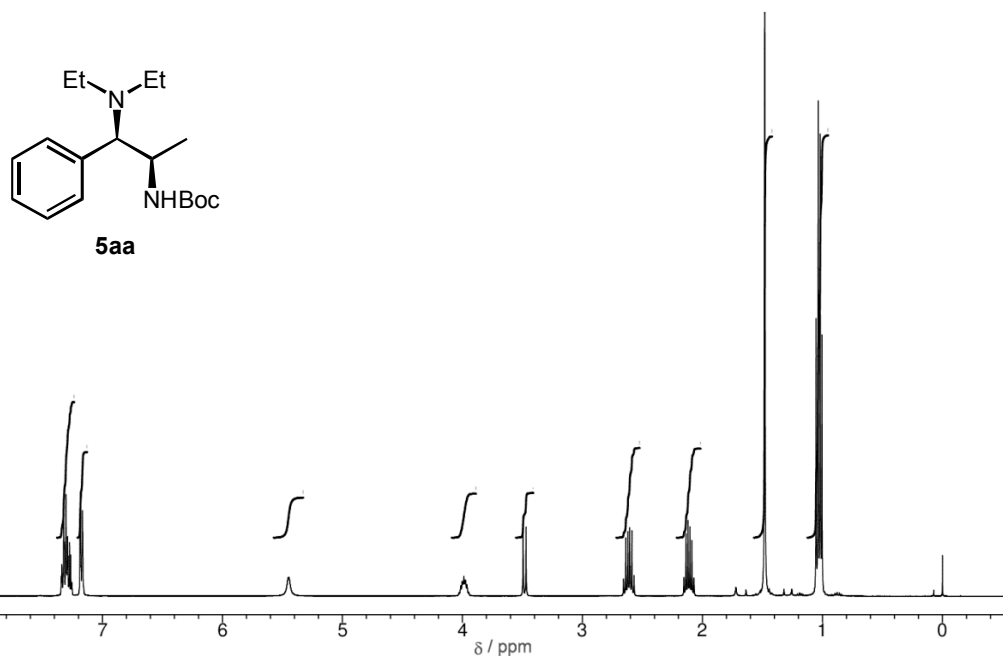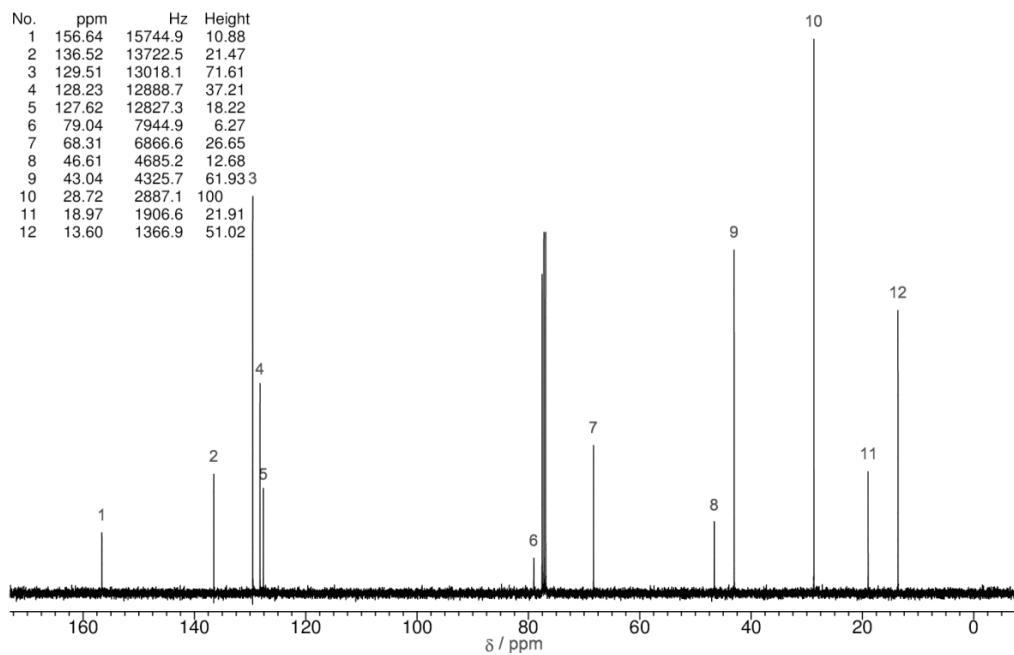

Supplement: Supplementary file 1 [file 4071229]
